# Supplementary material for: Fungal and ciliate protozoa are the main rumen microbes associated with methane emissions in dairy cattle
Source: PubMed Central journal article supplement (PMC8848325; doi:10.1093/gigascience/giab088), 2022-01-25
Supplement: giab088_giga-d-21-00239_original_submission.pdf [file giab088_giga-d-21-00239_original_submission.pdf]

## Fungal and ciliate protozoa are the main rumen microbes associated with methane emissions in dairy cattle

--Manuscript Draft--

|                                                      |                                                                                                                                                                                                                                                                                                                                                                                                                                                                                                                                                                                                                                                                                                                                                                                                                                                                                                                                                                                                                                                                                                                                                                                                                                                                                                                                                                                                                                                                                                                                                                                                                                                                                                                                                                                                                                                                                                                                                                                                                                                                                                                                                                                                                                                                                                                                                                                                                                                                                                                                                                                                                                                                                                                                                                                            |                        |
|------------------------------------------------------|--------------------------------------------------------------------------------------------------------------------------------------------------------------------------------------------------------------------------------------------------------------------------------------------------------------------------------------------------------------------------------------------------------------------------------------------------------------------------------------------------------------------------------------------------------------------------------------------------------------------------------------------------------------------------------------------------------------------------------------------------------------------------------------------------------------------------------------------------------------------------------------------------------------------------------------------------------------------------------------------------------------------------------------------------------------------------------------------------------------------------------------------------------------------------------------------------------------------------------------------------------------------------------------------------------------------------------------------------------------------------------------------------------------------------------------------------------------------------------------------------------------------------------------------------------------------------------------------------------------------------------------------------------------------------------------------------------------------------------------------------------------------------------------------------------------------------------------------------------------------------------------------------------------------------------------------------------------------------------------------------------------------------------------------------------------------------------------------------------------------------------------------------------------------------------------------------------------------------------------------------------------------------------------------------------------------------------------------------------------------------------------------------------------------------------------------------------------------------------------------------------------------------------------------------------------------------------------------------------------------------------------------------------------------------------------------------------------------------------------------------------------------------------------------|------------------------|
| <b>Manuscript Number:</b>                            | GIGA-D-21-00239                                                                                                                                                                                                                                                                                                                                                                                                                                                                                                                                                                                                                                                                                                                                                                                                                                                                                                                                                                                                                                                                                                                                                                                                                                                                                                                                                                                                                                                                                                                                                                                                                                                                                                                                                                                                                                                                                                                                                                                                                                                                                                                                                                                                                                                                                                                                                                                                                                                                                                                                                                                                                                                                                                                                                                            |                        |
| <b>Full Title:</b>                                   | Fungal and ciliate protozoa are the main rumen microbes associated with methane emissions in dairy cattle                                                                                                                                                                                                                                                                                                                                                                                                                                                                                                                                                                                                                                                                                                                                                                                                                                                                                                                                                                                                                                                                                                                                                                                                                                                                                                                                                                                                                                                                                                                                                                                                                                                                                                                                                                                                                                                                                                                                                                                                                                                                                                                                                                                                                                                                                                                                                                                                                                                                                                                                                                                                                                                                                  |                        |
| <b>Article Type:</b>                                 | Research                                                                                                                                                                                                                                                                                                                                                                                                                                                                                                                                                                                                                                                                                                                                                                                                                                                                                                                                                                                                                                                                                                                                                                                                                                                                                                                                                                                                                                                                                                                                                                                                                                                                                                                                                                                                                                                                                                                                                                                                                                                                                                                                                                                                                                                                                                                                                                                                                                                                                                                                                                                                                                                                                                                                                                                   |                        |
| <b>Funding Information:</b>                          | Ministerio de Economía y Competitividad (RTA2015-00022-C03-02)                                                                                                                                                                                                                                                                                                                                                                                                                                                                                                                                                                                                                                                                                                                                                                                                                                                                                                                                                                                                                                                                                                                                                                                                                                                                                                                                                                                                                                                                                                                                                                                                                                                                                                                                                                                                                                                                                                                                                                                                                                                                                                                                                                                                                                                                                                                                                                                                                                                                                                                                                                                                                                                                                                                             | Not applicable         |
|                                                      | INIA: Instituto Nacional de Investigacion y Tecnologia Agraria y Alimentaria (reference FPI-SGIT2016-06)                                                                                                                                                                                                                                                                                                                                                                                                                                                                                                                                                                                                                                                                                                                                                                                                                                                                                                                                                                                                                                                                                                                                                                                                                                                                                                                                                                                                                                                                                                                                                                                                                                                                                                                                                                                                                                                                                                                                                                                                                                                                                                                                                                                                                                                                                                                                                                                                                                                                                                                                                                                                                                                                                   | Mr Adrián López-García |
| <b>Abstract:</b>                                     | <p><b>Background:</b> This study analyzed whole rumen metagenome using long reads and considering its compositional nature in order to disentangle the role of rumen microbes in methane emissions. Efficient and low-cost strategies must be developed to characterize the taxonomical and functional composition of the rumen microbiome.</p> <p><b>Methods:</b> Rumen samples from 437 Holstein cows were sequenced using nanopore technology. After filtering, data were treated as compositional using a centered log-ratio transformation before statistical analyses. The association between overall microbiota composition and methane emissions was evaluated with PERMANOVA analysis. Differential abundance analyses were implemented to detect microbial taxa and functions associated to methane production. These associations were depicted in microbial networks.</p> <p><b>Results:</b> The beta-diversity analyses suggested an association between methane production and overall microbiota composition (<math>0.01 &lt; R^2 &lt; 0.02</math>). Differential abundance analysis identified 36 genera and 279 KEGGs as significantly associated to methane production (<math>P_{adj} &lt; 0.05</math>). Those genera associated to high methane production were Eukaryota from Alveolata and Fungi clades, while Bacteria were associated to low methane emissions. The genus-level association network showed two clusters grouping Eukaryota and Bacteria, respectively. Regarding microbial gene functions, 41 KEGGs resulted to be differentially abundant and were mainly involved in metabolic pathways. No KEGGs included in the methane metabolism pathway (ko00680) were detected as associated to high methane emissions. The KEGG network showed three clusters grouping KEGGs associated to high emissions, low emissions and not differentially abundant in either of them. A deeper analysis of the differentially abundant KEGGs revealed that genes related with anaerobic respiration through nitrate degradation were more abundant in low emissions animals.</p> <p><b>Conclusions:</b> This experiment has generated the largest ONT ruminal metagenomic dataset currently available. Methane emissions are largely associated to the relative abundance of ciliate and fungi. The role of nitrate electron acceptors can be particularly important as this respiration mechanism directly competes with methanogenesis. Therefore, whole metagenome sequencing is necessary to jointly consider relative abundance of Bacteria, Archaea and Eukaryota in the statistical analyses. Nutritional and genetic strategies to reduce CH<sub>4</sub> emissions should focus on reducing the relative abundance of Alveolata and Fungi in the rumen.</p> |                        |
| <b>Corresponding Author:</b>                         | Oscar Gonzalez-Recio<br>INIA: Instituto Nacional de Investigacion y Tecnologia Agraria y Alimentaria<br>Madrid, Ma SPAIN                                                                                                                                                                                                                                                                                                                                                                                                                                                                                                                                                                                                                                                                                                                                                                                                                                                                                                                                                                                                                                                                                                                                                                                                                                                                                                                                                                                                                                                                                                                                                                                                                                                                                                                                                                                                                                                                                                                                                                                                                                                                                                                                                                                                                                                                                                                                                                                                                                                                                                                                                                                                                                                                   |                        |
| <b>Corresponding Author Secondary Information:</b>   |                                                                                                                                                                                                                                                                                                                                                                                                                                                                                                                                                                                                                                                                                                                                                                                                                                                                                                                                                                                                                                                                                                                                                                                                                                                                                                                                                                                                                                                                                                                                                                                                                                                                                                                                                                                                                                                                                                                                                                                                                                                                                                                                                                                                                                                                                                                                                                                                                                                                                                                                                                                                                                                                                                                                                                                            |                        |
| <b>Corresponding Author's Institution:</b>           | INIA: Instituto Nacional de Investigacion y Tecnologia Agraria y Alimentaria                                                                                                                                                                                                                                                                                                                                                                                                                                                                                                                                                                                                                                                                                                                                                                                                                                                                                                                                                                                                                                                                                                                                                                                                                                                                                                                                                                                                                                                                                                                                                                                                                                                                                                                                                                                                                                                                                                                                                                                                                                                                                                                                                                                                                                                                                                                                                                                                                                                                                                                                                                                                                                                                                                               |                        |
| <b>Corresponding Author's Secondary Institution:</b> |                                                                                                                                                                                                                                                                                                                                                                                                                                                                                                                                                                                                                                                                                                                                                                                                                                                                                                                                                                                                                                                                                                                                                                                                                                                                                                                                                                                                                                                                                                                                                                                                                                                                                                                                                                                                                                                                                                                                                                                                                                                                                                                                                                                                                                                                                                                                                                                                                                                                                                                                                                                                                                                                                                                                                                                            |                        |
| <b>First Author:</b>                                 | Adrián López-García                                                                                                                                                                                                                                                                                                                                                                                                                                                                                                                                                                                                                                                                                                                                                                                                                                                                                                                                                                                                                                                                                                                                                                                                                                                                                                                                                                                                                                                                                                                                                                                                                                                                                                                                                                                                                                                                                                                                                                                                                                                                                                                                                                                                                                                                                                                                                                                                                                                                                                                                                                                                                                                                                                                                                                        |                        |
| <b>First Author Secondary Information:</b>           |                                                                                                                                                                                                                                                                                                                                                                                                                                                                                                                                                                                                                                                                                                                                                                                                                                                                                                                                                                                                                                                                                                                                                                                                                                                                                                                                                                                                                                                                                                                                                                                                                                                                                                                                                                                                                                                                                                                                                                                                                                                                                                                                                                                                                                                                                                                                                                                                                                                                                                                                                                                                                                                                                                                                                                                            |                        |

|                                                                                                                                                                                                                                                                                                                                                                                                                              |                           |
|------------------------------------------------------------------------------------------------------------------------------------------------------------------------------------------------------------------------------------------------------------------------------------------------------------------------------------------------------------------------------------------------------------------------------|---------------------------|
| <b>Order of Authors:</b>                                                                                                                                                                                                                                                                                                                                                                                                     | Adrián López-García       |
|                                                                                                                                                                                                                                                                                                                                                                                                                              | Alejandro Saborío-Montero |
|                                                                                                                                                                                                                                                                                                                                                                                                                              | Mónica Gutiérrez-Rivas    |
|                                                                                                                                                                                                                                                                                                                                                                                                                              | Raquel Atxaerandio        |
|                                                                                                                                                                                                                                                                                                                                                                                                                              | Idoia Goiri               |
|                                                                                                                                                                                                                                                                                                                                                                                                                              | Aser García-Rodríguez     |
|                                                                                                                                                                                                                                                                                                                                                                                                                              | José A. Jiménez-Montero   |
|                                                                                                                                                                                                                                                                                                                                                                                                                              | Carmen González           |
|                                                                                                                                                                                                                                                                                                                                                                                                                              | Javier Tamames            |
|                                                                                                                                                                                                                                                                                                                                                                                                                              | Fernando Puente-Sánchez   |
|                                                                                                                                                                                                                                                                                                                                                                                                                              | Magdalena Serrano         |
|                                                                                                                                                                                                                                                                                                                                                                                                                              | Rafael Carrasco           |
|                                                                                                                                                                                                                                                                                                                                                                                                                              | Cristina Óvilo            |
|                                                                                                                                                                                                                                                                                                                                                                                                                              | Oscar Gonzalez-Recio      |
| <b>Order of Authors Secondary Information:</b>                                                                                                                                                                                                                                                                                                                                                                               |                           |
| <b>Additional Information:</b>                                                                                                                                                                                                                                                                                                                                                                                               |                           |
| <b>Question</b>                                                                                                                                                                                                                                                                                                                                                                                                              | <b>Response</b>           |
| Are you submitting this manuscript to a special series or article collection?                                                                                                                                                                                                                                                                                                                                                | No                        |
| <b>Experimental design and statistics</b><br><br>Full details of the experimental design and statistical methods used should be given in the Methods section, as detailed in our <a href="#">Minimum Standards Reporting Checklist</a> . Information essential to interpreting the data presented should be made available in the figure legends.<br><br>Have you included all the information requested in your manuscript? | Yes                       |
| <b>Resources</b><br><br>A description of all resources used, including antibodies, cell lines, animals and software tools, with enough information to allow them to be uniquely identified, should be included in the Methods section. Authors are strongly encouraged to cite <a href="#">Research Resource Identifiers</a> (RRIDs) for antibodies, model organisms and tools, where possible.                              | Yes                       |

|                                                                                                                                                                                                                                                                                                                                                                                                                                                                                                                                                         |            |
|---------------------------------------------------------------------------------------------------------------------------------------------------------------------------------------------------------------------------------------------------------------------------------------------------------------------------------------------------------------------------------------------------------------------------------------------------------------------------------------------------------------------------------------------------------|------------|
| <p>Have you included the information requested as detailed in our <a href="#">Minimum Standards Reporting Checklist</a>?</p>                                                                                                                                                                                                                                                                                                                                                                                                                            |            |
| <p><b>Availability of data and materials</b></p> <p>All datasets and code on which the conclusions of the paper rely must be either included in your submission or deposited in <a href="#">publicly available repositories</a> (where available and ethically appropriate), referencing such data using a unique identifier in the references and in the “Availability of Data and Materials” section of your manuscript.</p> <p>Have you have met the above requirement as detailed in our <a href="#">Minimum Standards Reporting Checklist</a>?</p> | <p>Yes</p> |

## Fungal and ciliate protozoa are the main rumen microbes associated with methane emissions in dairy cattle.

1 **Adrián López-García<sup>1</sup>, Alejandro Saborío-Montero<sup>1,2</sup>, Mónica Gutiérrez-Rivas<sup>1</sup>,**  
2 **Raquel Atxaerandio<sup>3</sup>, Idoia Goiri<sup>3</sup>, Aser García-Rodríguez<sup>3</sup>, Jose A. Jiménez-**  
3 **Montero<sup>4</sup>, Carmen González<sup>1</sup>, Javier Tamames<sup>5</sup>, Fernando Puente-Sánchez<sup>5</sup>,**  
4 **Magdalena Serrano<sup>1</sup>, Rafael Carrasco<sup>6</sup>, Cristina Óvilo<sup>1</sup>, Oscar González-Recio<sup>1,7\*</sup>**

5 <sup>1</sup>Departamento de Mejora Genética Animal. Instituto Nacional de Investigación y  
6 Tecnología Agraria y Alimentaria, Crta. de la Coruña km 7.5, 28040 Madrid, Spain.

7 <sup>2</sup>Escuela de Zootecnia y Centro de Investigación en Nutrición Animal, Universidad de  
8 Costa Rica, 11501, San José, Costa Rica

9 <sup>3</sup>NEIKER – Instituto Vasco de Investigación y Desarrollo Agrario. Basque Research and  
10 Technology Alliance (BRTA). Campus Agroalimentario de Arkaute s/n, 01192 Arkaute,  
11 Spain.

12 <sup>4</sup>Confederación de Asociaciones de Frisona Española (CONAFE). Ctra. de Andalucía km  
13 23600 Valdemoro, 28340 Madrid, Spain.

14 <sup>5</sup>Departamento de Biología de Sistemas, Centro Nacional de Biotecnología, CSIC,  
15 Madrid, Spain

16 <sup>6</sup>Departamento de Periodismo y Nuevos Medios. Universidad Complutense de Madrid,  
17 Ciudad Universitaria s/n, 28040 Madrid, Spain.

18 <sup>7</sup>Departamento de Producción Agraria. Escuela Técnica Superior de Ingeniería  
19 Agronómica, Alimentaria y de Biosistemas. Universidad Politécnica de Madrid, Ciudad  
20 Universitaria s/n, 28040 Madrid, Spain.

21

22 **\* Correspondence:**

23 Óscar González-Recio

24 gonzalez.oscar@inia.es

25 **Keywords: dairy cattle, microbiome, rumen, methane, Nanopore, long reads.**

26

27 **1 Abstract**

28 Background: This study analyzed whole rumen metagenome using long reads and  
29 considering its compositional nature in order to disentangle the role of rumen microbes  
30 in methane emissions. Efficient and low-cost strategies must be developed to characterize  
31 the taxonomical and functional composition of the rumen microbiome.

32 Methods: Rumen samples from 437 Holstein cows were sequenced using nanopore  
33 technology. After filtering, data were treated as compositional using a centered log-ratio  
34 transformation before statistical analyses. The association between overall microbiota  
35 composition and methane emissions was evaluated with PERMANOVA analysis.  
36 Differential abundance analyses were implemented to detect microbial taxa and functions  
37 associated to methane production. These associations were depicted in microbial  
38 networks.

39 Results: The beta-diversity analyses suggested an association between methane  
40 production and overall microbiota composition ( $0.01 < R^2 < 0.02$ ). Differential abundance  
41 analysis identified 36 genera and 279 KEGGs as significantly associated to methane  
42 production ( $P_{adj} < 0.05$ ). Those genera associated to high methane production were  
43 Eukaryota from Alveolata and Fungi clades, while Bacteria were associated to low  
44 methane emissions. The genus-level association network showed two clusters grouping  
45 Eukaryota and Bacteria, respectively. Regarding microbial gene functions, 41 KEGGs  
46 resulted to be differentially abundant and were mainly involved in metabolic pathways.  
47 No KEGGs included in the methane metabolism pathway (ko00680) were detected as  
48 associated to high methane emissions. The KEGG network showed three clusters  
49 grouping KEGGs associated to high emissions, low emissions and not differentially  
50 abundant in either of them. A deeper analysis of the differentially abundant KEGGs

51 revealed that genes related with anaerobic respiration through nitrate degradation were  
52 more abundant in low emissions animals.

53 Conclusions: This experiment has generated the largest ONT ruminal metagenomic  
54 dataset currently available. Methane emissions are largely associated to the relative  
55 abundance of ciliate and fungi. The role of nitrate electron acceptors can be particularly  
56 important as this respiration mechanism directly competes with methanogenesis.  
57 Therefore, whole metagenome sequencing is necessary to jointly consider relative  
58 abundance of Bacteria, Archaea and Eukaryota in the statistical analyses. Nutritional and  
59 genetic strategies to reduce CH<sub>4</sub> emissions should focus on reducing the relative  
60 abundance of Alveolata and Fungi in the rumen.

## 61 **2 Introduction**

62 Next generation sequencing technologies have provided special relevance to microbial  
63 communities from different niches, as they allow identifying their taxonomic and  
64 functional profile. It has made possible to unravel the relationships between host and  
65 microbiota, as well as the complex interactions between microbes, with a special  
66 contribution to the role of digestive microbiome on complex traits both in humans <sup>1</sup> (e.g.  
67 type II diabetes, cancer, mental diseases) and in domestic animals <sup>2,3</sup> (e.g. feed efficiency,  
68 methane emissions, animal health).

69 Microbial communities are of special relevance in livestock. In ruminants, one of the  
70 main microbial communities lays in the rumen, due to its high diversity and large  
71 microbial mass <sup>4</sup> and its main role in feed fermentation to provide substrate to the animal,  
72 which is then transformed into product. Additionally, enteric methane is produced in the  
73 rumen by methanogenic microorganisms during feed fermentation <sup>5</sup> and is the main  
74 contributor of greenhouse gases (GHG) from livestock, with around 2,448 million tonnes

75 of CO<sub>2</sub>-equivalent (CO<sub>2</sub>e) per year <sup>6,7</sup>. The ongoing climate emergency urgently calls for  
76 efficient strategies to mitigate the carbon footprint from all sectors, including agriculture  
77 and livestock farming. Former studies have proven that complex traits in ruminants are  
78 usually influenced by global changes in microbial communities, more than by fluctuations  
79 in the abundance of specific microorganisms <sup>8,9</sup>. These global changes are usually due to  
80 the intricate interactions between different species in these communities (*i.e.*, predation,  
81 competition of ecological niche or co-dependency). Consequently, a better understanding  
82 of the interactions between microbial genes during methanogenesis is needed to propose  
83 strategies for reducing methane emissions. Promising strategies have been proposed to  
84 modulate the metagenome, nutrition and genetics <sup>10</sup>.

85 Classical statistical approaches do not allow to accurately assess the results of  
86 microbiome studies. The high sparsity of these data and their compositional nature  
87 generate multiple problems in statistical analysis, including subcompositional  
88 incoherence, increase of false positive rates in differential abundance analyses and  
89 detection of spurious correlations <sup>11</sup>.

90 As a consequence, new approaches considering both compositionality and multiple  
91 correlations are needed. It is also important to point out the advantages of whole  
92 metagenome sequencing over metataxonomic studies, because the latter cannot be used  
93 to determine functionality and because they pose some difficulties at simultaneously  
94 analyzing different superkingdoms <sup>12</sup>, which is necessary to account for the total  
95 variability of microbiomes and the interactions among their components. Different  
96 amplicons must be used to correctly classify Bacteria, Archaea, Protozoa and Fungi,  
97 increasing the cost of the studies and involving additional bias due to PCR <sup>13</sup>. They pose  
98 the additional difficulty of a proper comparison between communities sequenced in  
99 different reactions with different primers. Nanopore sequencing offers a cost-efficient

100 sequencing strategy for metagenomics studies providing both taxonomical and functional  
101 information simultaneously and for microbes from all superkingdoms. This technology  
102 has been improved in recent years, allowing to perform taxonomic and functional  
103 assignments with an accuracy comparable to Illumina <sup>14</sup>.

104 The objective of this study was to characterize the taxonomical and functional  
105 composition of rumen microbiota using long sequence reads obtained with Nanopore  
106 technology, and their relationship with enteric methane emission.

## 107 **3 Results**

### 108 **3.1 Cohort description**

109 Our cohort included 437 Holstein lactating cows sampled at 14 different herds from  
110 northern Spain (Cantabria, Euskadi, Navarra and Girona regions).

### 111 **3.2 Taxonomy of microbial composition**

112 After initial quality control, 6,394,671 reads with N50=4194 bp were classified in 3,921  
113 taxonomical features up to genus level. A filtering strategy was implemented to filter out  
114 low abundance microbes while keeping the core microbiome relevant for methane  
115 emissions. This filtering excluded 48,517 reads (<1%) which reduced the sparsity of the  
116 metagenome from 87% to 68%, although a large number of singleton and doubleton  
117 features remained (**Figure 1A**). The final core subcomposition included a total of  
118 6,318,344 reads, in 437 samples, classified in 1,240 taxonomical features: 967 known  
119 genera (722 bacteria, 13 archaea and 232 eukaryotes), and 273 that only reached family  
120 rank (*i.e.*, *Unclassified* denomination). Overall, 503 families, 277 orders, 158 classes and  
121 86 different phyla (37 bacterial phyla, 3 archaeal phyla and 46 eukaryotic clades) were  
122 classified.



123 Predominant microorganisms in this core rumen subcomposition were bacteria (91.6% ±  
124 6.93 of total average RA) from Bacteroidetes, Firmicutes and Fibrobacteres (**Figure 2**),  
125 representing an average relative abundance (RA) of 63%, 16% and 5%, respectively. The  
126 Bacteroidetes fraction was majorly composed by *Prevotella*, and was the main  
127 representative genus in the total community (19.4% average RA), along with other  
128 Prevotellaceae members. The Firmicutes group included a large number of genera. The  
129 order of Clostridiales dominated in terms of RA, with Lachnospiraceae and  
130 Ruminococcaceae families being the most representative ones. The remaining phyla (34)  
131 from the Bacteria superkingdom represented 7.6% averaged RA of the core metagenome.  
132 Eukaryotes represented a total average RA of 8.2% (±6.95) of the core subcomposition.  
133 Predominant eukaryotic clades were those included in the SAR supergroup  
134 (Stramenopiles-Alveolata-Rhizaria)<sup>15</sup>, accounting for 6% of total average RA, followed  
135 by Fungi (1.3% of total average RA). Alveolata clade was the most abundant among the  
136 eukaryotes, with a high representation of unclassified Ophryoscolecidae, *Stentor* and  
137 *Paramecium*. Archaea representation in the core subcomposition (0.24% ± 0.25 of total  
138 average RA) consisted mostly of Methanomicrobia, Methanobacteria and  
139 Thermoplasmata members. Yet, a large number of reads could not be assigned to a known  
140 genus. The relative abundance per animal of the most relevant taxonomic groups is  
141 depicted in **Figure 3**.

### 142 **3.3 Functionality of microbial composition**

143 A total of 30,326,550 reads were assigned to KEGGs. After quality control and  
144 prevalence filtering, a total of 84,219 reads (0,28%) were removed and the sparsity was  
145 reduced from 72% to 39% (**Figure 1B**). The final KEGG table was composed by  
146 30,145,459 reads from 437 samples, classified in 6,644 KEGGs. These KEGG pathways  
147 and BRITE hierarchies<sup>16-18</sup> were represented in a Treemap according to their average

148 RA (**Figure 4**). Most of the rumen metagenome functions were in pathways that represent  
149 the metabolism of carbohydrate, amino acid and other biological compounds, as well as  
150 of energy metabolism. In addition, functions involved in cellular generic processes (cell  
151 growth, transport, or genetic and environmental information processing) were also  
152 present. KEGG BRITE classification showed a high presence of proteins involved in  
153 cellular processes and metabolism.

### 154 **3.4 Beta-diversity and PERMANOVA analysis**

155 Beta-diversity was represented in PCA between samples at five different taxonomic  
156 levels (phylum, class, order, family and genus), as well as with KEGG, using centered  
157 log-ratio (CLR) transformed datasets. Then a permutational analysis of variance  
158 (PERMANOVA) was implemented (Gloor et al., 2017), sequentially adding the effect of  
159 farm-batch (B), stage of lactation (SL), number of lactation (NL) and level of methane  
160 emissions (CH<sub>4</sub>) discretized in four groups (LOW, L-MID, H-MID and HIGH). The  
161 visualization did not show a clear visual clustering of samples by methane emission levels  
162 (**Figure 5**). However, a generalized additive model (GAM) smooth fitting allowed  
163 visualizing non-linear distribution patterns of the microbial samples according to CH<sub>4</sub>  
164 emissions inside the ordination at all taxonomic levels. The non-linear pattern was more  
165 evident at the phylum, class and genus levels, although the proportion of methane  
166 variability explained was low ( $\approx 4.8\%$  according to GAM model fitting). No relevant  
167 differences were visually appreciated using the KEGG information. Nonetheless, some  
168 differences in the overall rumen microbiome composition between animals with different  
169 methane emissions were evidenced by the PERMANOVA analysis, both for taxonomy  
170 and functionality (Table 1). The results showed significant differences for the centroid  
171 distance between methane emission groups at every taxonomic level and also for KEGGs,  
172 but they explained a low percentage of total variance ( $0.01 < R^2 < 0.02$ ).

### 173 3.5 Rumen microbes associated to CH<sub>4</sub> emissions

174 The effect of taxonomical features on methane emission levels was evaluated through  
175 differential abundance analysis. Thirty-three genera were found as differentially abundant  
176 (DA) ( $P_{adj} < 0.05$ ) between LOW and HIGH emitters (**Figure 6A**), while 15 genera  
177 showed DA between LOW and H-MID emitters and one genus between LOW and L-  
178 MID emitters (**Supplementary Data 1**). Note that 13 out of the 15 genera showing DA  
179 ( $P_{adj} < 0.05$ ) between LOW and H-MID groups were also significant in the LOW vs HIGH  
180 contrast, but not in LOW vs L-MID contrast, indicating gradual abundance change from  
181 low to high emitters. Accounting for all contrasts and duplicated genera, 36 DA genera  
182 resulted significant. We classified these genera according to in which group they resulted  
183 overabundant (OA). Thus, 10 of them were more abundant in the LOW group (LOW-  
184 OA) and 1 in the L-MID group. The remaining 25 genera were OA in the HIGH groups  
185 (HIGH-OA): HIGH (12), HIGH and H-MID (11) or H-MID (2). HIGH-OA genera  
186 represented an overall RA of 4.15%, whereas LOW-OA genera accounted for 0.25% of  
187 total RA. The two genera over-abundant in H-MID were *Dictyostelium* and *Unclassified*  
188 *Eimeriidae*, and the one associated to L-MID was classified as *Candidatus Izimaplasma*  
189 (Tenericutes). The log<sub>2</sub>FC values ranged between 0.7 and -0.7 in genera showing DA for  
190 methane emission levels, highlighting that the differences between groups were moderate.

191 Overall, DA results indicate that taxa associated to higher methane levels belong to the  
192 Eukaryota superkingdom, while those associated to lower emissions were bacteria. We  
193 found multiple Ciliophora genera associated to the HIGH group (mostly Parameciidae,  
194 Stentoridae and Pseudocohnilembidae members) but also Amoebozoa and some Fungi or  
195 Pseudo-fungi. Other bacterial genera associated to lower methane production were  
196 *Hespellia*, from Clostridiales, and *Sutterella*, an asaccharolytic genus from  
197 Betaproteobacteria.

### 198 **3.6 Microbial gene function associated to CH<sub>4</sub> emissions**

199 Differential abundance analysis was also performed for KEGG features on methane  
200 emission levels. A total of 192 KEGGs were DA between the LOW and HIGH emissions  
201 groups (**Figure 6B**). Differences were also found between the LOW and H-MID groups  
202 (**Supplementary Data 1**). As in the taxonomy dataset, some of the KEGGs presented  
203 significant DA in both LOW vs HIGH and LOW vs H-MID contrasts. Accounting for  
204 these duplicates and all the contrasts, 182 were over-abundant in the high emissions  
205 groups (HIGH-OA), whereas 97 KEGGs were over-abundant in low emissions groups  
206 (LOW-OA). The overall RA for HIGH-OA KEGGs was 2.31% and 0.64% for LOW-OA  
207 KEGGs. Of these, 13 HIGH-OA KEGGs and 28 LOW-OA KEGGs were assigned to  
208 metabolic pathways. No KEGGs from the ko00680 pathway were found as HIGH-OA.  
209 KEGGs related to inositol-phosphate metabolism (K00889, K01110, K18082 and  
210 K20279), starch and sucrose metabolism (K01203) or several lipid metabolism pathways  
211 were present in the HIGH-OA group. According to LOW-OA KEGGs, some of them  
212 were involved in volatile fatty acid (VFA) metabolism (e.g., K00209 enoyl-[acyl-carrier  
213 protein] reductase [EC:1.3.1.9], K01902 succinyl-CoA synthetase alpha subunit  
214 [EC:6.2.1.5] and K01682 aconitate hydratase 2 [EC:4.2.1.3]) and the K09251 putrescine  
215 aminotransferase [EC:2.6.1.82] related to putrescine and cadaverine degradation to 4-  
216 amino-butanoate (GABA) or 2-oxoglutarate. Also, several KEGGs in the LOW-OA  
217 group were related to N metabolism (K00370 and K00371 nitrate reductase subunits  
218 [EC:1.7.5.1]), oxidative phosphorylation (K03885 NADH dehydrogenase [EC:1.6.99.3])  
219 and to carbohydrate, lipid or vitamin metabolism pathways. The ko00680 KEGG K13788  
220 was also over-abundant in the LOW emissions group.

### 221 **3.7 Interaction networks**

222 Interaction networks were built using the previous results in order to visualize the  
223 association between taxa and genes using pairwise correlations between features.  
224 Pairwise proportionality correlation coefficients ( $\rho_p$ ) were calculated on the CLR-  
225 transformed datasets for phylum, genus and KEGG features to avoid spurious correlations  
226 that can potentially surge in compositional data <sup>19</sup>.

227 The most relevant pairwise proportionalities between genera and between KEGGs were  
228 visualized as interaction networks, classifying features as associated to high methane  
229 emissions (HIGH), low methane emissions (LOW) or not associated to methane  
230 emissions (N/A), according to the results from the differential abundance analyses. The  
231 interaction networks for genera and KEGGs are shown in **Figure 7** and **Figure 8**,  
232 respectively.

233 Eukaryotes clustered together in the network with large representation of the SAR  
234 supergroup, and showed negative proportionality to Bacteria. The genera that were  
235 associated to higher methane emissions belonged to the Eukaryota superkingdom  
236 (Ciliophora and Fungi), whereas Bacteria were associated to lower CH<sub>4</sub> production. The  
237 strongest inverse proportionalities between both subpopulations connected several  
238 eukaryotes with *Unclassified Veillonellaceae* and *Oribacterium* ( $-0.64 < \rho_p < -0.53$ ),  
239 *i.e.*, microbiomes with lower abundance of *Oribacterium* or Veillonellaceae tend to  
240 present larger abundances of protozoa and Fungi, and were therefore associated to larger  
241 emissions. Unclassified microbes from Neocallimastigaceae, Oxytrichidae and  
242 Vibrionaceae families showed the highest centrality and a large connectivity degree.

243 The functional network showed three main clusters that grouped KEGGs associated to  
244 HIGH methane level (cluster H), KEGGs not related to methane emissions (cluster N),  
245 and a small one including KEGGs associated to lower emissions (cluster L). Connections

246 between clusters were not symmetric: H cluster was connected to N cluster by inverse  
247 proportionalities between some of their components, but the L cluster appeared connected  
248 only to N cluster by direct proportionalities through non-clustered KEGGs. Also, most of  
249 the ko00680 KEGGs (*i.e.*, directly involved in methanogenesis or participating in  
250 pathways leading to methanogenesis precursors) did not appear as differentially abundant  
251 between high-emission and low-emission cows.

### 252 **3.8 Taxonomy of genes**

253 A traceback of genes' taxonomy was carried out, separately for ko00680 KEGGs and for  
254 DA KEGGs. Thirty out of the 85 ko00680 KEGGs were predominant in Archaea groups,  
255 one predominated in Eukaryota (K05979) and the rest were predominant in Bacteria  
256 (**Figure 9**). Although the RA distribution of these KEGGs was normally between 60%  
257 and 100% in the predominant superkingdom, 4 KEGGs were more evenly distributed  
258 between clades: K01007 and K00863 had a RA < 60% in Bacteria and showed RA > 30%  
259 in Eukaryota; K05979 was the KEGG predominating in Eukaryota, but with a RA near  
260 to 60% (38% in Bacteria and 12% in Archaea); and K14080 had a RA of 57% in Archaea  
261 and 43% in Bacteria. Regarding the DA KEGGs, those from the LOW-OA group showed  
262 larger abundance in Bacteria, mostly in genera from Proteobacteria, Bacteroidetes and  
263 Firmicutes phyla. Different groups of bacteria also carried KEGGs from the HIGH-OA  
264 group although these KEGGs were more abundant in eukaryotes. The HIGH-OA KEGGs  
265 were mainly mapped to unclassified eukaryotes, but those which could be classified  
266 belonged majorly to Fungi and SAR supergroup (**Figure 10**).

## 267 **4 Discussion**

268 In this study we assessed the composition of the ruminal microbiota using long reads from  
269 Nanopore sequencing technology. We observed predominance of Bacteroidetes,

270 Firmicutes and Fibrobacteres in the rumen metagenome, as reported in previous studies  
271 <sup>8,20</sup>. Bacteroidetes and Firmicutes are common bacteria in all kind of ecosystems,  
272 including gut microbiota of multiple animals. The fraction of Bacteroidetes was mainly  
273 composed by *Prevotella*. This group includes anaerobic gram-negative bacteria involved  
274 in saccharolytic processes <sup>21</sup>. Their large abundance in the digestive microbiota has been  
275 previously reported in ruminant <sup>22–25</sup> and monogastric species <sup>26,27</sup>. A wide representation  
276 of polysaccharide fermenters is represented in the rumen communities <sup>28</sup>. Fibrobacteres  
277 comprises a small group of cellulose-degrading bacteria usually present in ruminant  
278 digestive system <sup>29</sup>. Eukaryotes also represented a relevant amount of the rumen core  
279 metagenome. This group has been reported to contribute up to 50% of total ruminal  
280 biomass <sup>30</sup>. The SAR supergroup and Fungi were the most relevant ones <sup>15</sup>. This group of  
281 Eukaryota is found in a wide variety of ruminants and pseudoruminants <sup>31</sup>. Other  
282 eukaryotes included *Stentor*, aquatic free-living heterotricheans which can be particle  
283 filtrators or predators of other protozoa, and usually live symbiotically with some algae  
284 species <sup>32,33</sup>. Also *Paramecium* are well-known ciliates which predate bacteria and other  
285 microorganisms, including protozoa <sup>34</sup>. Archaeal fraction was mostly composed by strict  
286 methanogenic organisms from Methanomicrobia and Methanobacteria clades <sup>35</sup>, but also  
287 included Thermoplasmata, which are methylotrophic-methanogenic acidophilic  
288 organisms <sup>36</sup>. Gene Ontology associated found KEGGs to several metabolic functions as  
289 well as cellular processes. Additionally, pathways related to pathogenic activity were also  
290 present, in agreement with the RA of several genera that included some known pathogenic  
291 species. For instance, some species from genera such as *Vibrio*, *Haemophilus*,  
292 *Trypanosoma* or *Staphylococcus*, although not every species from these genera are  
293 pathogenic, but opportunistic or commensal organisms. In addition, pathogenic activity

294 presence in our dataset might be biased due to a larger representation of human related  
295 diseases in the databases.

296 The SqueezeMeta software applies a stringent threshold for taxonomy classification to  
297 ensure that reads have a large probability of being correctly classified, at expense of a  
298 large number of reads remaining unclassified, which explains the larger number of reads  
299 assigned to a known KEGG than to taxa. Despite this strict requirement, this composition  
300 is consistent with other populations reported before<sup>2,3,20</sup>. Most studies to date report large  
301 abundance of *Bacteroidetes* and *Firmicutes*, with *Prevotella spp.* as the most prevalent  
302 genus. Some minor discrepancies with other studies were observed in the RA of the core  
303 subcomposition. For example, Wallace et al.<sup>20</sup> showed a higher presence of  
304 Proteobacteria and Euryarchaeota, although using amplicons instead of whole  
305 metagenome sequencing.

306 We performed several statistical approaches to infer association between the rumen  
307 metagenome and methane emissions. Our approach evidenced the difficulty of inferring  
308 a phenotypic association between microbiome composition and methane production, with  
309 environmental factors covering the statistical signal. However, our compositional  
310 approach showed a meaningful relationship between the microbiome composition and  
311 methane emissions, emphasizing the role of the different phyla, with Eukaryota  
312 superkingdom being of particular relevance. Microbial networks contributed to detect  
313 genes associated to ko00680 pathway and elucidated some methane emission dynamics.  
314 These interactions configure the level of methane production and must be considered  
315 jointly at modulating the rumen microbiome. Former studies already revealed the link  
316 between ruminal microbiota and methane production. For instances, Difford et al.<sup>3</sup>  
317 observed clustering of high and low methane emitters within bacterial and archaeal  
318 subcommunities. Danielsson et al.<sup>37</sup> also found clustering for low and high methane



319 emitters within bacterial rumen subcompositions. Wallace et al.<sup>20</sup> found that a core set  
320 of rumen microbiome was capable of explaining up to 30% of methane emissions  
321 variability, this set mostly formed by prokaryotes. The aforementioned studies used  
322 different methodologies, like amplicon analysis and OTU clustering, contrasting with our  
323 full-metagenome genus-clustering protocol, which increases the information entropy.  
324 Stewart et al.<sup>38</sup> used Nanopore sequencing and found significant differences between low  
325 and high-methane emitter sheep, with clear clustering between groups but using a lower  
326 number of microbial groups, and animals in the same farm with similar management  
327 practices.

328 The DA analysis allowed us to define specific taxa that were different between high and  
329 low methane emitters. Ciliates, fungi and pseudo-fungi were more abundant in cows with  
330 higher levels of methane emissions. Microbes associated to lower methane emissions  
331 were saccharolytic members of class Gammaproteobacteria (*Anaerobiospirillum*<sup>39</sup>,  
332 *Vibrio*<sup>40</sup> or *Pseudoalteromonas*<sup>41</sup>), as well as Negativicutes genera from Veillonellaceae  
333 (*Dialister*, *Megasphaera*) and Selenomonadaceae (*Mitsuokella*). *Dialister* produce  
334 succinate decarboxylation, and *Megasphaera* ferment carbohydrate and lactate<sup>42</sup>, while  
335 *Mitsuokella* are saccharolytic bacteria<sup>43</sup>. Interestingly, no taxonomic group of  
336 methanogenic archaea showed association with methane emissions. The relationship  
337 between Archaea and methane production in rumen is not consistent in the literature.  
338 Some authors reported either individual relationships between methane emissions and  
339 some archaeal species<sup>37,44</sup> or correlations between overall archaeal gene abundance and  
340 methane emissions level<sup>45,46</sup>. However, other studies showed no relationship between  
341 methanogenic *Archaea* and methane<sup>44,47</sup>. Ciliates play a central role in the abundance of  
342 archaea, as many are known to symbiotically engulf a variety of methanogenic archaea  
343<sup>48</sup>. The association between protozoa abundance in rumen and methane emissions is well

344 known, as protozoa have an impact in the archaeal population structure <sup>49</sup> and some  
345 protozoa defaunation experiments, both *in vitro* <sup>50,51</sup> and *in vivo* <sup>52,53</sup>, have demonstrated  
346 a reduction in methane emissions <sup>54</sup>. This may explain the relevant association estimated  
347 between ciliates and fungi with methane.

348 Despite this association between methane and large taxonomic groups, it is of interest to  
349 infer which specific clades and microbial genes are participating directly or indirectly in  
350 methanogenesis. This may help at disentangling the role of the different microbes in feed  
351 fermentation and methanogenesis. Microbial networks contributed to elucidate methane  
352 emission dynamics and associate genes to pathways indirectly related to methane  
353 metabolism. They clearly clustered eukaryotes together, with many of them being  
354 significantly more abundant in the high emissions group. Other authors have already  
355 established a positive correlation between fungi abundance and methane emissions <sup>8</sup>, as  
356 well as a close interdependence of protists and fungi. Although correlation between  
357 methane emissions and protozoa abundances is still a matter of discussion <sup>45,53</sup>, current  
358 meta analyses point to a linear relationship between protozoan numbers and methane  
359 emissions ( $r=0.96$ ) <sup>55</sup>. Among eukaryotes, anaerobic protozoa and some *Chytridiomycota*  
360 produce H<sub>2</sub> in their hydrogenosomes <sup>56</sup> (e.g. *Neocallimastix sp.*). These organelles supply  
361 endosymbiotic methanogenic archaea with substrate for methane production and provide  
362 protection against oxygen toxicity <sup>30,48</sup>. Methanogenic taxa and their enzymes were not  
363 highly represented in the high-emissions cluster. The relative abundance of archaea in the  
364 rumen is low compared to eukaryotes and bacteria. However, they are tightly linked to  
365 ciliate protozoa and fungi. Free-living methanogens represent a low-abundant population  
366 <sup>55</sup>, and CH<sub>4</sub> biosynthesis might be more influenced by methanogens engulfed by protozoa,  
367 mostly ciliates <sup>48</sup>. Hence, a larger methanogenesis activity is expected to be correlated  
368 with a larger abundance of eukaryotes which are more abundant and better represented in

369 the network than archaea. Furthermore, lysis of archaea cell walls often requires specific  
370 protocols during DNA extraction, and they might be under-represented<sup>57</sup> in metagenomic  
371 studies, including this experiment. This could partially explain the lack of association  
372 between archaea abundance and methane in some previous studies<sup>10</sup>. On the other hand,  
373 the ruminotype in low-emissions animals has more abundance of *Proteobacteria* and  
374 *Firmicutes* genera. Other authors also reported higher abundances of these bacterial phyla  
375 in low methane emissions animals<sup>8</sup>. Also, lactate- and succinate-producers have been  
376 reported to be more abundant in low-emitters<sup>58</sup>, supporting the higher abundance of  
377 *Anaerobiospirillum* or *Megasphaera* in LOW animals.

378 According to microbial genes, we firstly classified KEGGs according to their presence or  
379 absence in ko00680 pathway (methane metabolism), as a way to evaluate their direct  
380 involvement in methanogenesis or else their participation in pathways leading to  
381 biosynthesis of precursor compounds. Although we found several ko00680 KEGGs  
382 which are presumably involved in the biosynthesis of methanogenesis precursors, most  
383 of them were not associated to methane emissions (*i.e.*, not differentially abundant  
384 between methane groups), as it can be visualized in the KEGG network. The taxonomy  
385 distribution of these KEGGs showed that most of them are mainly present in bacteria or  
386 eukaryotes and might be functioning in metabolic pathways not related with  
387 methanogenesis. For instance, some of the KEGGs inside the methane metabolism  
388 pathway can also be involved in glycine, serine and threonine metabolism (e.g. K00058,  
389 K00831, K01079 and K00600), pyruvate and propanoate metabolism (e.g. K00625 and  
390 K13788), glycolysis (e.g. K01689, K15633, K01624 and K02446) or anaerobic carbon  
391 fixation (e.g. K00198)<sup>16-18</sup>. Furthermore, the presence of genes does not mean that they  
392 are transcribed. In a metagenomic analysis, all present genes are sequenced regardless  
393 whether they are transcribed or not. Also, bacterial epigenetic mechanisms affected by

394 the animal diet could play a role in this gene expression <sup>59</sup>. Another group of ko00680  
395 KEGGs is exclusive from *Archaea*, but the under-representation of this clade in our  
396 dataset might obscure statistical significance.

397 Since no methanogenesis KEGGs were detected as associated to methane emissions, a  
398 deeper evaluation of individual DA genes allowed us to find some KEGGs which could  
399 be involved in the biosynthesis of methanogenesis precursors, or else influence the  
400 abundance of methanogenic archaea.

401 We found some KEGGs which could be indirectly related with methanogenesis through  
402 biosynthesis of precursor compounds. K00209 and K13788 are involved in butyrate and  
403 propanoate biosynthesis, being essentially carried by primary fermentative bacteria <sup>60</sup>.  
404 Their relationship with methanogenesis is indicated by the fact that VFA can be used by  
405 secondary fermenters to produce methanogenesis precursors such as H<sub>2</sub>, CO<sub>2</sub>, acetate and  
406 formate <sup>61,62</sup>. In fact, K13788 is a phosphate acetyltransferase [EC:2.3.1.8] that can be  
407 involved in the biosynthesis of acetate from acetyl-CoA <sup>63</sup>. Also, K09251 is involved in  
408 biosynthesis of GABA and 2-oxoglutarate. GABA has been related with a VFA  
409 concentration increment <sup>64</sup>, while 2-oxoacid compounds can be used by archaea has been  
410 linked to synthesize coenzyme M and coenzyme B, which are essential in methane  
411 production in methanogens <sup>65</sup>. However, all these KEGGs were observed as over-  
412 abundant in LOW methane group, suggesting a strong presence of fermentative bacteria  
413 in these animals, not directly correlated with methane production.

414 Other KEGGs that were over-abundant in LOW emitters might offer an explanation to  
415 the lower presence of active methanogenesis processes through competence mechanisms.  
416 LOW-OA KEGGs K01682, K01902 and, once more, K13788, are involved in citrate  
417 cycle and pyruvate metabolism, related to respiration. Also, KEGGs K00370 and K00371

418 are nitrate oxidoreductase subunits having a role in anaerobic respiration using nitrate as  
419 electron acceptor. This enzyme uses nitrate as electron acceptor, a process that has been  
420 reported as competitive inhibitor of methanogenesis<sup>66,67</sup> and nitrate supplementation has  
421 proven a useful strategy to mitigate methane emissions<sup>68</sup>. Furthermore, nitrite produced  
422 by the nitrate-reductases has a known antimicrobial effect and toxicity to animal cells<sup>69–</sup>  
423 <sup>71</sup>, which might as well reduce the proportion of free archaea in LOW animals, although  
424 toxicity to archaea must be further studied<sup>72</sup>. However, the role of ciliates and fungi must  
425 be clarified, as their abundance is also lower in LOW emitters. We hypothesize that the  
426 predatory nature of these eukaryotes might be a control mechanism for bacterial  
427 populations, and their lower relative abundance in LOW animals might allow overgrowth  
428 of related bacteria. Nevertheless, we cannot discard the possibility that a higher  
429 proportion of facultative anaerobes using nitrate as acceptor might affect ciliate  
430 populations by toxicity, thus reducing the presence of endosymbiotic methanogenic  
431 archaea.

## 432 **5 Conclusions**

433 This study grants a huge amount of metagenomic information, since we generated the  
434 largest publicly-available ruminal metagenomic dataset sequenced using ONT long reads  
435 approach. The complexity of the rumen microbiome and the compositional nature of their  
436 sequencing data require proper statistical methods to allow disentangling the role of  
437 microbes and their genes in host complex traits such as methane emissions. The full  
438 metagenome compositional analysis used in this study provided novel insights in the  
439 association between the microbiota and CH<sub>4</sub> emissions through differential abundance  
440 analysis, pairwise correlation and interaction networks.

441 Our approach evidenced a phenotypic association between microbiome composition and  
442 methane production, regardless of the challenges posed by the microbiome complexity  
443 and the compositional nature of the data. This association is mainly driven by the relative  
444 abundance of ciliates and fungi, which carry host specific genetic functions providing  
445 substrate to the methanogenic archaea. On the other side, we detected some bacterial  
446 groups that performed a more efficient feed digestion, leaving less hydrogen available to  
447 archaea and hence associated to lower methane emissions. Further studies must be carried  
448 out to determine proper nutritional and breeding strategies that modulate the microbiome  
449 composition towards lower emissions and larger feed efficiency.

## 450 **6 Methods**

### 451 **6.1 Animal housing and feeding**

452 The animals received total mixed ration (TMR) diet differently formulated on each  
453 individual herd, although most of them were based on maize and grass silage plus  
454 concentrate. Cows were fed ad-libitum, with concentrate supplementation in the  
455 automatic milking station (AMS) during milking.

### 456 **6.2 Methane measuring**

457 Methane concentration was individually recorded through breath sampling during each  
458 cow visit to the AMS (3-7 times daily) in a period of 2-3 weeks. Eructation peaks were  
459 recorded using a non-dispersive infrared methane detector (Guardian NG infrared gas  
460 monitor, Edinburgh Sensors, Scotland, UK) as described by Rey et al. (2019)<sup>73</sup>. Each  
461 cow's peaks were then averaged in order to get a unique methane record per cow, as  
462 described in López-Paredes et al. (2020)<sup>74</sup>. Animals were distributed in groups according  
463 to number of lactation (NL) and stage of lactation (SL) criteria. Furthermore, quartile-

464 based qualitative categories were created for CH<sub>4</sub> recordings (ppm), resulting in a  
465 methane factor (CH<sub>4</sub>) with 4 levels (LOW, L-MID, H-MID and HIGH methane  
466 emissions).

### 467 **6.3 Ruminal content sampling**

468 Ruminal fluid was sampled using an oral tube (18 mm diameter and 160 mm long)  
469 connected to a 1000 mL Erlenmeyer flask and continued to a mechanical pump  
470 (Vacubrand ME 2SI, Wertheim, Germany), with all the material contacting the cow being  
471 carefully cleaned between cows. Each animal was moved to an individual stall for this  
472 process. The solid fraction of the ruminal content was discarded by filtering through 4  
473 layers of sterile cheesecloth, while the outcoming liquid fraction was instantly frozen  
474 using liquid nitrogen (LN<sub>2</sub>) and then stored at -80 °C until DNA extraction.

### 475 **6.4 DNA extraction and sequencing**

476 Genomic DNA was extracted from 250 µl of each thawed and homogenized ruminal  
477 content sample, using the “DNeasy Power Soil” commercial kit (QIAGEN, Valencia, CA,  
478 USA). Qubit fluorometer (ThermoFisher Scientific, 150 Waltham, MA, USA) and  
479 Nanodrop ND-1000 UV/Vis spectrophotometer (Nanodrop Technologies Inc., DE, USA)  
480 were used to measure DNA concentration and purity. 260/280 and 260/230 ratios were  
481 around 1.8 and 2.0, respectively. Oxford Nanopore Technologies (ONT) SQK-LSK109  
482 Ligation Sequencing kit was used for multiplexed sequencing in MinION automatic  
483 sequencer. The 1D Native barcoding ONT kit (EXP-NBD104 or EXP-NBD114) was used  
484 for multiplexing the samples, pooling barcoded DNA from 12 samples for each run.  
485 Pooling was done using a 1.5 ml DNA LoBind tube to perform adapter ligation and  
486 sequenced using a R9.4.1 flow cell.

## 487 **6.5 Bioinformatics**

488 Guppy toolkit (ONT) was used for basecalling. A quality control was then applied  
489 removing sequences with  $QS < 7$  and  $length < 150$  bp. Sequence analysis was performed  
490 using SqueezeMeta (SQM) pipeline for long reads <sup>75</sup>, which performs Diamond Blastx  
491 against GenBank nr taxonomic database and against COG and KEGG functional  
492 databases, then identifying and annotating ORFs using the lca (last common ancestor)  
493 method for taxonomy and the fun3 algorithm for functional annotation (based on e-value  
494 and identity scores). This tool is specifically designed to process long reads from ONT.

495 49,718,901 reads were processed in Blastx by SQM longreads pipeline. Blastx mapped  
496 25,750,755 reads (51.79%) to taxonomy (NCBI-nr database) or function (KEGG  
497 database). All sequences mapped as non-microbial (*i.e.*, virus, animals and plants) were  
498 discarded. Microbial sequences were then filtered by prevalence to reduce data sparsity  
499 and sequencing errors (**Supplementary Data 2**). A first estimation of sample sparsity and  
500 reads distribution was assessed using R. Two animals were then withdrawn from the  
501 filtered dataset, one due to low read coverage and other due to lack of host information,  
502 leaving 437 animals in the final dataset.

503 Genera were divided into superkingdom groups (Archaea, Bacteria or Eukaryota) and  
504 KEGGs were sorted by their involvement in methane metabolism (MP): KEGGs included  
505 in the KEGG orthology pathway ko00680 (Methane metabolism) were labeled as  
506 “ko00680”, while the rest were identified as “Other”.

## 507 **6.6 Compositional data**



508 Considering the compositional nature of metagenomic data, a CLR method <sup>76</sup> was  
509 applied using the unweighted option of the *CLR* function from the *easyCODA* R package  
510 <sup>77</sup> as follows:

$$511 \quad \mathbf{x}_{\text{clr}} = [\log(x_1/G(x)), \log(x_2/G(x)) \dots \log(x_D/G(x))],$$

$$512 \quad \text{with } G(x) = \sqrt[D]{x_1 * x_2 * \dots * x_D}.$$

513 Being  $\mathbf{x} = [x_1, x_2, \dots, x_D]$  a vector of counted features (taxa or KEGGs) in one sample and  
514  $G(x)$  the geometric mean of  $\mathbf{x}$ . Count zero values in the initial data frame were imputed  
515 through the Geometric Bayesian Multiplicative (GBM) procedure, using the  
516 *zCompositions* R package <sup>78</sup> *cmultRepl* function, so that logarithms could be computed.

## 517 **6.7 Beta-diversity and PERMANOVA analysis**

518 The CLR-transformed data (at phylum, class, order, family, genus and KEGG levels)  
519 were used to explore beta-diversity in the samples through PCA using the *prcomp*  
520 function in R. Fitted smooth surface of methane emissions corrected by SL and NL was  
521 included for principal components 1 and 2 using *ordisurf* function from the *vegan* R  
522 package <sup>79</sup>. A generalized additive model smooth fitting (GAM) was used in order to  
523 elucidate non-linear distribution of samples in PCA according to methane emissions.  
524 Differences between centroid distances using methane as grouping variable (*CH4*) were  
525 determined through Permutational Multivariate Analysis of Variance (PERMANOVA)  
526 <sup>80,81</sup> following this model and using the matrix of Aitchison distances between samples  
527 (*i.e.*, the Euclidean distance on CLR-transformed data) as input variable:

$$528 \quad D_{jkltni} = \mu + B_j + SL_k + NL_l + CH4_n + e_{jkltni}$$

529 with  $B_j$  being the farm-batch effect ( $j = 24$  levels),  $SL_k$  being the stage of lactation at the  
530 day of sampling ( $k = 3$  levels),  $NL_l$  the number of lactation ( $l = 2$  levels) and  $CH4_n$  the  
531 methane emission level ( $n = 4$  levels: LOW, L-MID, H-MID, HIGH), and  $e_{jklmi}$  was the  
532 corresponding residual term.

## 533 **6.8 Association between microbiota and methane production**

534 Differential abundance of genera and KEGGs between samples regarding the different  
535 methane emissions levels was addressed through linear regression using Limma<sup>82</sup>. Count  
536 normalization and log-transformation were addressed using CLR-transformed data as  
537 inputs.  $P$ -values were adjusted by Benjamini-Hochberg method, to control false discovery  
538 rate. Differential abundance threshold was set to  $|\log_2FC| \geq 0.5$  and the adjusted  
539 significance threshold was set to  $\alpha = 0.05$ .

## 540 **6.9 Pairwise proportionality analysis**

541 Pairwise correlations between phyla, genera and KEGGs were calculated as described in  
542 the *propr* R package<sup>83</sup>. Proportionality coefficient  $\rho_p$ <sup>84</sup> under CLR data transformation  
543 was chosen. Thresholds were selected according to two conditions: 1) representing the  
544 maximum number of proportionalities avoiding computational issues; 2) FDR lower than  
545 1%. Used threshold were  $|\rho_p| \geq 0.4$  for genera proportionalities and  $|\rho_p| \geq 0.7$  for KEGG  
546 proportionalities.

## 547 **6.10 Microbial networks**

548 Microbial networks for taxonomy (at the genus level) and functionality were built from  
549 the proportionality matrices described above. Input edges were defined from the  
550 cytoscape function in *propr* package in R, which converts a *propr* object into a data frame  
551 of node connections compatible with Cytoscape software (v. 3.8.0). Results from the DA

552 analyses were used to associate each feature (node) to high or low methane emissions  
553 levels. Significantly over-abundant genera and KEGGs in the low methane emitters group  
554 (*i.e.*, more abundant in LOW than in HIGH or H-MID groups) were designated as LOW-  
555 associated, while those contrary over-abundant in high methane emitters were appointed  
556 as HIGH-associated. Non-DA features were classified as N/A (not associated). In  
557 addition, SK and MP factors were included as node attributes for genera and KEGGs,  
558 respectively. For graph visualization, Kamada-Kawai algorithm (Edge-weighted spring  
559 embedded layout) was set <sup>85</sup>, using  $\rho_p$  coefficient as force parameter.

## 560 **7 Ethical statement**

561 This study was conducted in accordance with Spanish Royal Decree 53/2013 for the  
562 protection of animals used for experimental and other scientific purposes and was  
563 approved by the Basque Institute for Agricultural Research and Development Ethics  
564 Committee (Neiker-OEBA-2017-004) on March 28, 2017.

## 565 **8 Conflict of Interest**

566 The authors have not stated any conflicts of interest.

## 567 **9 Author Contributions**

568 A.L.G. and A.S.M. filtered and prepared the data, implemented the statistical analyses  
569 and prepared the first draft of the manuscript. M.G.R and C.G. performed the DNA  
570 extraction and sequencing. O.G.R. supervised the DNA sequencing and contributed to  
571 the statistical analyses. R.C. contributed to develop interaction networks. O.G.R., A.G.R,  
572 R.A., I.G. conceived the study and designed the experiments. J.T. and F.P.S developed  
573 the computational pipelines for the metagenome and assisted on its analyses. A.L.G.,

574 A.S.M. and O.G.R. wrote the manuscript. All authors helped writing and configuring the  
575 last version of the manuscript.

## 576 **10 Funding**

577 This research was financed by RTA2015-00022-C03-02 (METALGEN) project from the  
578 national plan of research, development and innovation 2013-2020 and the Department of  
579 Economic Development and Competitiveness (Madrid, Spain).

## 580 **11 Acknowledgments**

581 We thank the regional Holstein Associations and farmers collaborating in the project.  
582 Computational support from the High-Performance Computing Centre in Galicia (Spain)  
583 is acknowledged. A.L.G. was funded by FPI-INIA grant with reference FPI-SGIT2016-  
584 06.

## 585 **12 Consent for publication**

586 Not applicable.

## 587 **13 Data and material**

588 The data set supporting the results of this article are available in the European Nucleotide  
589 Archive (ENA) repository, with accession number PRJEB44278.

## 590 **14 Availability of source code and requirements**

591 Project name: SqueezeMeta

592 Project home page: <https://github.com/jtamames/SqueezeMeta>

593 Operating system(s): x86\_64 Linux OS

594 Programming language: C, C++, Python, Perl, R, Roff

595 Other requirements: Conda

596 License: GNU GPL v3

597

598 Project name: Guppy

599 Project home page: <https://community.nanoporetech.com/downloads>

600 Operating system(s): Platform independent

601 License: N/A

602

603 Project name: CoreOme

604 Project home page: <https://github.com/aloggar/CoreOme>

605 Operating system(s): Platform independent

606 Programming language: R, shell, awk

607 Other requirements: R 3.6.1 or higher

608 License: GNU GPL v3

609

610 Project name: R-metagenomics

611 Project home page: <https://github.com/aloggar/R-metagenomics>

612 Operating system(s): Platform independent

613 Programming language: R

614 Other requirements: R 3.6.1 or higher

615 License: GNU GPL v3

616

617 **15 References**

- 618 1. Wang, B., Yao, M., Lv, L., Ling, Z. & Li, L. The Human Microbiota in Health and Disease.  
619 *Engineering* **3**, 71–82 (2017).
- 620 2. Delgado, B. *et al.* Whole rumen metagenome sequencing allows classifying and  
621 predicting feed efficiency and intake levels in cattle. *Sci. Rep.* **9**, 1–13 (2018).
- 622 3. Difford, G. F. *et al.* Host genetics and the rumen microbiome jointly associate with  
623 methane emissions in dairy cows. *PLOS Genet.* **14**, e1007580 (2018).
- 624 4. Weimer, P. J. Redundancy, resilience, and host specificity of the ruminal microbiota:  
625 Implications for engineering improved ruminal fermentations. *Front. Microbiol.* **6**,  
626 296 (2015).
- 627 5. Knapp, J. R., Laur, G. L., Vadas, P. A., Weiss, W. P. & Tricarico, J. M. Invited review:  
628 Enteric methane in dairy cattle production: Quantifying the opportunities and impact  
629 of reducing emissions. *J. Dairy Sci.* **97**, 3231–3261 (2014).
- 630 6. Gerber *et al.* Tackling Climate Change Through Livestock. A global assessment of  
631 emissions and mitigation opportunities. 139 (2013) doi:www.fao.org/publications.
- 632 7. FAO. Global Livestock Environmental Assessment Model (GLEAM). *Food and*  
633 *Agriculture Organization* <http://www.fao.org/gleam/results/en/> (2019).
- 634 8. Martínez-Álvaro, M. *et al.* Identification of Complex Rumen Microbiome Interaction  
635 Within Diverse Functional Niches as Mechanisms Affecting the Variation of Methane  
636 Emissions in Bovine. *Front. Microbiol.* **11**, 659 (2020).
- 637 9. Malmuthuge, N. & Guan, L. L. Understanding host-microbial interactions in rumen:  
638 searching the best opportunity for microbiota manipulation. *J. Anim. Sci. Biotechnol.*  
639 **8**, 8 (2017).
- 640 10. Negussie, E. *et al.* Invited review: Large-scale indirect measurements for enteric  
641 methane emissions in dairy cattle: A review of proxies and their potential for use in  
642 management and breeding decisions. *J. Dairy Sci.* **100**, 2433–2453 (2017).
- 643 11. Gloor, G. B., Macklaim, J. M., Pawlowsky-Glahn, V. & Egozcue, J. J. Microbiome datasets  
644 are compositional: And this is not optional. *Front. Microbiol.* **8**, 2224 (2017).
- 645 12. Liu, Y. X. *et al.* A practical guide to amplicon and metagenomic analysis of microbiome  
646 data. *Protein Cell* (2020) doi:10.1007/s13238-020-00724-8.
- 647 13. Bonk, F., Popp, D., Harms, H. & Centler, F. PCR-based quantification of taxa-specific  
648 abundances in microbial communities: Quantifying and avoiding common pitfalls. *J.*  
649 *Microbiol. Methods* **153**, 139–147 (2018).
- 650 14. Brandt, C., Bongcam-Rudloff, E. & Müller, B. Abundance Tracking by Long-Read  
651 Nanopore Sequencing of Complex Microbial Communities in Samples from 20  
652 Different Biogas/Wastewater Plants. *Appl. Sci.* **10**, 7518 (2020).
- 653 15. Burki, F. *et al.* Phylogenomics Reshuffles the Eukaryotic Supergroups. *PLoS One* **2**,  
654 e790 (2007).

- 655 16. Kanehisa, M. & Goto, S. KEGG: Kyoto Encyclopedia of Genes and Genomes. *Nucleic*  
656 *Acids Res.* **28**, 27–30 (2000).
- 657 17. Kanehisa, M. Toward understanding the origin and evolution of cellular organisms.  
658 *Protein Sci.* **28**, 1947–1951 (2019).
- 659 18. Kanehisa, M., Sato, Y., Furumichi, M., Morishima, K. & Tanabe, M. New approach for  
660 understanding genome variations in KEGG. *Nucleic Acids Res.* **47**, D590–D595 (2019).
- 661 19. Lovell, D., Pawlowsky-Glahn, V., Egozcue, J. J., Marguerat, S. & Bähler, J.  
662 Proportionality: A Valid Alternative to Correlation for Relative Data. *PLOS Comput.*  
663 *Biol.* **11**(3), e1004075, 1–12 (2015).
- 664 20. Wallace, R. J. *et al.* A heritable subset of the core rumen microbiome dictates dairy  
665 cow productivity and emissions. *Sci. Adv.* **5**, 1–12 (2019).
- 666 21. Shah, H. N. & Collins, D. M. *Prevotella*, a new genus to include *Bacteroides*  
667 *melaninogenicus* and related species formerly classified in the genus *Bacteroides*.  
668 *Int. J. Syst. Bacteriol.* **40**, 205–208 (1990).
- 669 22. Pitta, D. W. *et al.* Rumen bacterial diversity dynamics associated with changing from  
670 bermudagrass hay to grazed winter wheat diets. *Microb. Ecol.* **59**, 511–522 (2010).
- 671 23. Lee, H. J. *et al.* Comparative survey of rumen microbial communities and metabolites  
672 across one caprine and three bovine groups, using bar-coded pyrosequencing and 1H  
673 nuclear magnetic resonance spectroscopy. *Appl. Environ. Microbiol.* **78**, 5983–5993  
674 (2012).
- 675 24. Lopes, L. D. *et al.* Exploring the sheep rumen microbiome for carbohydrate-active  
676 enzymes. *Antonie van Leeuwenhoek, Int. J. Gen. Mol. Microbiol.* **108**, 15–30 (2015).
- 677 25. Li, J. *et al.* A catalog of microbial genes from the bovine rumen unveils a specialized  
678 and diverse biomass-degrading environment. *Gigascience* **9**, 1–15 (2020).
- 679 26. Crespo-Piazuelo, D. *et al.* Characterization of bacterial microbiota compositions  
680 along the intestinal tract in pigs and their interactions and functions. *Sci. Rep.* **8**, 1–  
681 12 (2018).
- 682 27. Han, G. G. *et al.* Tracing of the fecal microbiota of commercial pigs at five growth  
683 stages from birth to shipment. *Sci. Rep.* **8**, 1–9 (2018).
- 684 28. Seshadri, R. *et al.* Cultivation and sequencing of rumen microbiome members from  
685 the Hungate1000 Collection. *Nat. Biotechnol.* **36**, 359–367 (2018).
- 686 29. Ransom-Jones, E., Jones, D. L., McCarthy, A. J. & McDonald, J. E. The Fibrobacteres: An  
687 Important Phylum of Cellulose-Degrading Bacteria. *Microb. Ecol.* **63**, 267–281  
688 (2012).
- 689 30. Newbold, C. J., De La Fuente, G., Belanche, A., Ramos-Morales, E. & McEwan, N. R. The  
690 Role of Ciliate Protozoa in the Rumen. *Front. Microbiol.* **6**, 1–14 (2015).
- 691 31. Williams, A. G. & Coleman, G. S. *The Rumen Protozoa*. (Springer New York, 1992).  
692 doi:10.1007/978-1-4612-2776-2.
- 693 32. Johnson, H. P. A contribution to the morphology and biology of the Stentors. *J.*



- 694 *Morphol.* **8**, 467–562 (1893).
- 695 33. Tartar, V. *The Biology of Stentor*. (Pergamon Press, 1961). doi:10.1016/c2013-0-  
696 01654-4.
- 697 34. Wichterman, R. *The Biology of Paramecium*. (Springer US, 1986). doi:10.1007/978-  
698 1-4757-0372-6.
- 699 35. Cavalier-Smith, T. The neomuran origin of archaeobacteria, the negibacterial root of  
700 the universal tree and bacterial megaclassification. *Int. J. Syst. Evol. Microbiol.* **52**, 7–  
701 76 (2002).
- 702 36. Poulsen, M. *et al.* Methylotrophic methanogenic Thermoplasmata implicated in  
703 reduced methane emissions from bovine rumen. *Nat. Commun.* **4**, 1–7 (2013).
- 704 37. Danielsson, R. *et al.* Methane Production in Dairy Cows Correlates with Rumen  
705 Methanogenic and Bacterial Community Structure. *Front. Microbiol.* **8**, 226 (2017).
- 706 38. Stewart, R. D. *et al.* Compendium of 4,941 rumen metagenome-assembled genomes  
707 for rumen microbiome biology and enzyme discovery. *Nat. Biotechnol.* **37**, 953–961  
708 (2019).
- 709 39. Santos, E. de O. & Thompson, F. The family Succinivibrionaceae. in *The Prokaryotes:*  
710 *Gammaproteobacteria* (eds. Rosenberg, E., DeLong, E. F., Lory, S., Stackebrandt, E. &  
711 Thompson, F.) vol. 9783642389 639–648 (Springer, Berlin, Heidelberg, 2014).
- 712 40. Gomez-Gil, B. *et al.* The Family Vibrionaceae. in *The Prokaryotes:*  
713 *Gammaproteobacteria* (eds. Rosenberg, E., DeLong, E. F., Lory, S., Stackebrandt, E. &  
714 Thompson, F.) 659–747 (Springer, Berlin, Heidelberg, 2014). doi:10.1007/978-3-  
715 642-38922-1\_225.
- 716 41. Ivanova, E. P., Ng, H. J. & Webb, H. K. The family Pseudoalteromonadaceae. in *The*  
717 *Prokaryotes: Gammaproteobacteria* (eds. Rosenberg, E., DeLong, E. F., Lory, S.,  
718 Stackebrandt, E. & Thompson, F.) 575–582 (Springer, Berlin, Heidelberg, 2014).  
719 doi:10.1007/978-3-642-38922-1\_229.
- 720 42. Marchandin, H. & Jumas-Bilak, E. The family Veillonellaceae. in *The Prokaryotes:*  
721 *Firmicutes and Tenericutes* (eds. Rosenberg, E., DeLong, E. F., Lory, S., Stackebrandt,  
722 E. & Thompson, F.) vol. 9783642301 433–453 (Springer, Berlin, Heidelberg, 2014).
- 723 43. Shah, H. N. & Collins, M. D. Reclassification of *Bacteroides multiacidus* (Mitsuoka,  
724 Terada, Watanabe and Uchida) in a new genus *Mitsuokella*, as *Mitsuokella*  
725 *multiacidus* comb. nov. *Zentralblatt fur Bakteriologie. Angew. und Okol. Microbiol. Abt.1*  
726 *Orig.C Hyg.* **3**, 491–494 (1982).
- 727 44. Shi, W. *et al.* Methane yield phenotypes linked to differential gene expression in the  
728 sheep rumen microbiome. *Genome Res.* **24**, 1517–1525 (2014).
- 729 45. Wallace, R. J. *et al.* Archaeal abundance in post-mortem ruminal digesta may help  
730 predict methane emissions from beef cattle. *Sci. Rep.* **4**, (2014).
- 731 46. Wallace, R. J. *et al.* The rumen microbial metagenome associated with high methane  
732 production in cattle. *BMC Genomics* **16**, 1–14 (2015).
- 733 47. Aguinaga Casañas, M. A. *et al.* Methyl-coenzyme M reductase A as an indicator to

- 734 estimate methane production from dairy cows. *J. Dairy Sci.* **98**, 4074–4083 (2015).
- 735 48. Belanche, A., de la Fuente, G. & Newbold, C. J. Study of methanogen communities  
736 associated with different rumen protozoal populations. *FEMS Microbiol. Ecol.* **90**,  
737 663–677 (2014).
- 738 49. Janssen, P. H. & Kirs, M. Structure of the archaeal community of the rumen. *Appl.*  
739 *Environ. Microbiol.* **74**, 3619–3625 (2008).
- 740 50. Newbold, C. J., Lassalas, B. & Jouany, J. P. The importance of methanogens associated  
741 with ciliate protozoa in ruminal methane production in vitro. *Lett. Appl. Microbiol.*  
742 **21**, 230–234 (1995).
- 743 51. Qin, W. Z., Li, C. Y., Kim, J. K., Ju, J. G. & Song, M. K. Effects of defaunation on  
744 fermentation characteristics and methane production by rumen microbes in vitro  
745 when incubated with starchy feed sources. *Asian-Australasian J. Anim. Sci.* **25**, 1381–  
746 1388 (2012).
- 747 52. Schönhusen, U. *et al.* Effects of protozoa on methane production in rumen and  
748 hindgut of calves around time of weaning. *Arch. Anim. Nutr.* **57**, 279–295 (2003).
- 749 53. Morgavi, D. P., Martin, C., Jouany, J. P. & Ranilla, M. J. Rumen protozoa and  
750 methanogenesis: Not a simple cause-effect relationship. *Br. J. Nutr.* **107**, 388–397  
751 (2012).
- 752 54. Guyader, J. *et al.* Influence of rumen protozoa on methane emission in ruminants: a  
753 meta-analysis approach. *Animal* **8**, 1816–1825 (2014).
- 754 55. Tapio, I., Snelling, T. J., Strozzi, F. & Wallace, R. J. The ruminal microbiome associated  
755 with methane emissions from ruminant livestock. *Journal of Animal Science and*  
756 *Biotechnology* vol. 8 1–11 (2017).
- 757 56. Hackstein, J. H. P. & de Graaf, R. M. Anaerobic Ciliates and Their Methanogenic  
758 Endosymbionts. in *(Endo)symbiotic Methanogenic Archaea* (ed. Hackstein, J. H. P.)  
759 13–23 (Springer Berlin, 2018). doi:10.1007/978-3-319-98836-8\_2.
- 760 57. Roopnarain, A., Mukhuba, M., Adeleke, R. & Moeletsi, M. Biases during DNA extraction  
761 affect bacterial and archaeal community profile of anaerobic digestion samples.  
762 *Biotech* **7:375**, 1–12 (2017).
- 763 58. Kittelmann, S. *et al.* Two Different Bacterial Community Types Are Linked with the  
764 Low-Methane Emission Trait in Sheep. *PLoS One* **9**, e103171 (2014).
- 765 59. Casadesús, J. & Low, D. Epigenetic Gene Regulation in the Bacterial World. *Microbiol.*  
766 *Mol. Biol. Rev.* **70**, 830–856 (2006).
- 767 60. Esquivel-Elizondo, S., Ilhan, Z. E., Garcia-Peña, E. I. & Krajmalnik-Brown, R. Insights  
768 into Butyrate Production in a Controlled Fermentation System via Gene Predictions.  
769 *mSystems* **2**, (2017).
- 770 61. Crable, B. R., Plugge, C. M., McInerney, M. J. & Stams, A. J. M. Formate formation and  
771 formate conversion in biological fuels production. *Enzyme Res.* **2011**, 1–8 (2011).
- 772 62. Hao, L. *et al.* Novel syntrophic bacteria in full-scale anaerobic digesters revealed by  
773 genome-centric metatranscriptomics. *ISME J.* **14**, 906–918 (2020).

- 774 63. Brown, T. D. K., Jones-Mortimer, M. C. & Kornberg, H. L. The enzymic interconversion  
775 of acetate and acetyl-coenzyme A in *Escherichia coli*. *J. Gen. Microbiol.* **102**, 327–336  
776 (1977).
- 777 64. Xie, M., Chen, H. H., Nie, S. P., Yin, J. Y. & Xie, M. Y. Gamma-aminobutyric acid increases  
778 the production of short-chain fatty acids and decreases pH values in mouse colon.  
779 *Molecules* **22**, (2017).
- 780 65. Graham, D. E. 2-oxoacid metabolism in methanogenic CoM and CoB biosynthesis. in  
781 *Methods in Enzymology* vol. 494 301–326 (Academic Press Inc., 2011).
- 782 66. Klüber, H. D. & Conrad, R. Effects of nitrate, nitrite, NO and N<sub>2</sub>O on methanogenesis  
783 and other redox processes in anoxic rice field soil. *FEMS Microbiol. Ecol.* **25**, 301–318  
784 (2006).
- 785 67. Yang, C., Rooke, J. A., Cabeza, I. & Wallace, R. J. Nitrate and inhibition of ruminal  
786 methanogenesis: Microbial ecology, obstacles, and opportunities for lowering  
787 methane emissions from ruminant livestock. *Front. Microbiol.* **7**, 132 (2016).
- 788 68. Lee, C. & Beauchemin, K. A. Une revue de l'ajout de nitrate dans l'alimentation des  
789 ruminants: Toxicité aux nitrates, émissions de méthane et performance de  
790 production. *Can. J. Anim. Sci.* **94**, 557–570 (2014).
- 791 69. Cui, X. The bacteriocidal effects of transition metal complexes containing the NO+  
792 group on the food-spoilage bacterium *Clostridium sporogenes*. *FEMS Microbiol. Lett.*  
793 **98**, 67–70 (1992).
- 794 70. Zumft, W. G. The biological role of nitric oxide in bacteria. *Arch. Microbiol.* **160**, 253–  
795 264 (1993).
- 796 71. Reed, B. *et al.* Alterations in mammalian cells induced by inactivation of vitamin B12  
797 with nitrous oxide. in *Vitamin B12* (eds. Zagalak, B. & Friedrich, W.) 1061–1064 (De  
798 Gruyter, 1979). doi:10.1515/9783111510828-120.
- 799 72. Klüber, H. D. & Conrad, R. Inhibitory effects of nitrate, nitrite, NO and N<sub>2</sub>O on  
800 methanogenesis by *Methanosarcina barkeri* and *Methanobacterium bryantii*. *FEMS*  
801 *Microbiol. Ecol.* **25**, 331–339 (1998).
- 802 73. Rey, J. *et al.* Comparison Between Non-Invasive Methane Measurement Techniques  
803 in Cattle. *Animals* **9**, 1–9 (2019).
- 804 74. López-Paredes, J. *et al.* Mitigation of greenhouse gases in dairy cattle via genetic  
805 selection: 1. Genetic parameters of direct methane using noninvasive methods and  
806 proxies of methane. *J. Dairy Sci.* **103**, 7199–7209 (2020).
- 807 75. Tamames, J. & Puente-Sánchez, F. SqueezeMeta, A Highly Portable, Fully Automatic  
808 Metagenomic Analysis Pipeline. *Front. Microbiol.* **9**, 1–10 (2019).
- 809 76. Aitchison, J. The Statistical Analysis of Compositional Data. *J. R. Stat. Soc. Ser. B* **44**,  
810 139–160 (1982).
- 811 77. Greenacre, M. Package 'easyCODA'. Compositional Data Analysis in Practice. 35  
812 (2019).
- 813 78. Palarea-Albaladejo, J. & Martín-Fernández, J. A. ZCompositions - R package for

814 multivariate imputation of left-censored data under a compositional approach.  
815 *Chemometrics and Intelligent Laboratory Systems* vol. 143 85–96 (2015).

816 79. Oksanen, J. *et al.* vegan: Community Ecology Package. R package version 2.5-6.  
817 (2020).

818 80. Anderson, M. J. A new method for non-parametric multivariate analysis of variance.  
819 *Austral Ecol.* **26**, 32–46 (2001).

820 81. McArdle, B. H. & Anderson, M. J. Fitting multivariate models to community data: A  
821 comment on distance-based redundancy analysis. *Ecology* **82**, 290–297 (2001).

822 82. Ritchie, M. E. *et al.* limma powers differential expression analyses for RNA-  
823 sequencing and microarray studies. *Nucleic Acids Res.* **43**, (2015).

824 83. Quinn, T. P., Richardson, M. F., Lovell, D. & Crowley, T. M. Propr: An R-package for  
825 Identifying Proportionally Abundant Features Using Compositional Data Analysis.  
826 *Sci. Rep.* **7**, 1–9 (2017).

827 84. Erb, I. & Notredame, C. How should we measure proportionality on relative gene  
828 expression data? *Theory Biosci.* **135**, 21–36 (2016).

829 85. Kamada, T. & Kawai, S. An algorithm for drawing general undirected graphs. *Inf.*  
830 *Process. Lett.* **31**, 7–15 (1989).

831

832

833

834 **16 Tables**

835 **Table 1:** F statistic and P-values for stage of lactation (SL), number of lactation (NL) and  
 836 methane emission (CH<sub>4</sub>) variables (added sequentially) and P-values from  
 837 PERMANOVA of the entire dataset (i.e., including all superkingdoms).

|        |                       | F statistic | R <sup>2</sup> | P-value |
|--------|-----------------------|-------------|----------------|---------|
| Phylum | <i>SL</i>             | 6.1         | 0.014          | <0.01*  |
|        | <i>NL</i>             | 1.4         | 0.003          | 0.11    |
|        | <i>CH<sub>4</sub></i> | 2.8         | 0.019          | <0.01*  |
| Class  | <i>SL</i>             | 5.6         | 0.013          | <0.01*  |
|        | <i>NL</i>             | 1.5         | 0.003          | 0.07    |
|        | <i>CH<sub>4</sub></i> | 2.4         | 0.016          | <0.01*  |
| Order  | <i>SL</i>             | 5.4         | 0.012          | <0.01*  |
|        | <i>NL</i>             | 1.7         | 0.004          | 0.03*   |
|        | <i>CH<sub>4</sub></i> | 2.3         | 0.016          | <0.01*  |
| Family | <i>SL</i>             | 4.9         | 0.011          | <0.01*  |
|        | <i>NL</i>             | 1.6         | 0.004          | 0.03*   |
|        | <i>CH<sub>4</sub></i> | 2.1         | 0.014          | <0.01*  |
| Genus  | <i>SL</i>             | 4.0         | 0.009          | <0.01*  |
|        | <i>NL</i>             | 1.4         | 0.003          | 0.03*   |
|        | <i>CH<sub>4</sub></i> | 1.7         | 0.012          | <0.01*  |
| KEGG   | <i>SL</i>             | 5.3         | 0.012          | <0.01*  |
|        | <i>NL</i>             | 2.0         | 0.004          | 0.02*   |
|        | <i>CH<sub>4</sub></i> | 2.4         | 0.016          | <0.01*  |

838 \*P-value &lt; 0.05

839

840

841 **17 Figure captions**

842 **Figure 1: Feature counts distribution.** Features with zero counts, singletons, doubletons  
843 and 3 or more counts per sample in the final taxonomy table (A) and in the final  
844 functionality table (B).

845 **Figure 2: Average relative abundance of genera.** A) All features, including those  
846 classified only to family level (i.e., unclassified genera); B) Features classified to genus  
847 level (unclassified genera removed).

848 **Figure 3: Phyla relative abundance per sample.** Samples are sorted from lowest to  
849 highest methane emissions.

850 **Figure 4: Metagenome functionality.** TreeMap distribution of functionality abundances  
851 classified as KEGG pathways (left) and BRITE hierarchies (right) associated with core  
852 KEGG subcomposition.

853 **Figure 5. Fitted surface representation of Principal Component Analysis.** Dots  
854 represent the samples using euclidean distances of CLR-transformed taxa abundances,  
855 colored by CH<sub>4</sub> levels. CH<sub>4</sub> emissions (ppm) corrected by number and stage of lactation  
856 are represented as smooth fitting following a generalized additive model (GAM) (–). *Dev.*  
857 *Explained:* variability explained by GAM; *P-val:* approximate significance of the smooth  
858 terms being zero ( $\alpha=0.05$ ).

859 **Figure 6. Volcano plots.** Volcano plot representing the differential abundance (DA) of  
860 genera (A) and KEGGs (B) between LOW and HIGH groups from limma. Significance  
861 thresholds were established at  $adj.P\text{-}val = 0.05$  and  $\log_2FC = \pm 0.5$ . • Significant features  
862 with DA above the fold change (FC) threshold. • Significant features with DA below the

863 FC threshold. • Non-significant features with DA above the FC threshold. • Non-  
864 significant features with DA below the FC threshold.

865 **Figure 7. Taxonomy interaction network.** Pairwise proportionalities between genera  
866 with  $|\rho_p| \geq 0.4$ . Superkingdom:  $\Delta$  Archaea;  $\square$  Bacteria;  $\bigcirc$  Eukaryota. / CH<sub>4</sub> association:  
867  $\text{---}$  HIGH CH<sub>4</sub>;  $\text{---}$  LOW CH<sub>4</sub>;  $\text{---}$  No CH<sub>4</sub> associated. / Proportionality sense:  $\leftrightarrow$  direct ( $>$   
868 0);  $\leftrightarrow$  inverse ( $<$  0).

869 **Figure 8. Functionality interaction network.** Presented pairwise proportionalities  
870 between KEGGs with  $|\rho_p| \geq 0.7$ / Participation in methane metabolism:  $\square$  ko00680 (direct  
871 or indirect part.);  $\bigcirc$  Other (no part.) / CH<sub>4</sub> association:  $\text{---}$  HIGH CH<sub>4</sub>;  $\text{---}$  LOW CH<sub>4</sub>;  $\text{---}$   
872 No CH<sub>4</sub> associated. / Proportionality sense:  $\leftrightarrow$  direct ( $>$  0);  $\leftrightarrow$  inverse ( $<$  0). Clusters are  
873 indicated as L (KEGGs associated to LOW methane), H (KEGGs associated to HIGH  
874 methane) and N (KEGGs not related to methane emissions).

875 **Figure 9: Taxonomy of ko00680 KEGGs.** Relative abundance of KEGGs present in  
876 ko00680 pathway for each phylum in Archaea ( $\text{---}$ ), Bacteria ( $\text{---}$ ) and Eukaryota ( $\text{---}$ )  
877 superkingdoms. Relative abundance of each ko00680-KEGG respect to the sum of reads  
878 mapped to all ko00680-KEGGs.

879 **Figure 10. Taxonomic distribution of DA KEGGs.** Red density scale represents  
880 KEGGs over-abundant (OA) in HIGH emitters; Blue density scale represents KEGGs OA  
881 in LOW emitters. More intense colors mean a higher number of reads assigned to one  
882 phylum. Superkingdom:  $\bullet$  Archaea;  $\bullet$  Bacteria;  $\bullet$  Eukaryota.

883

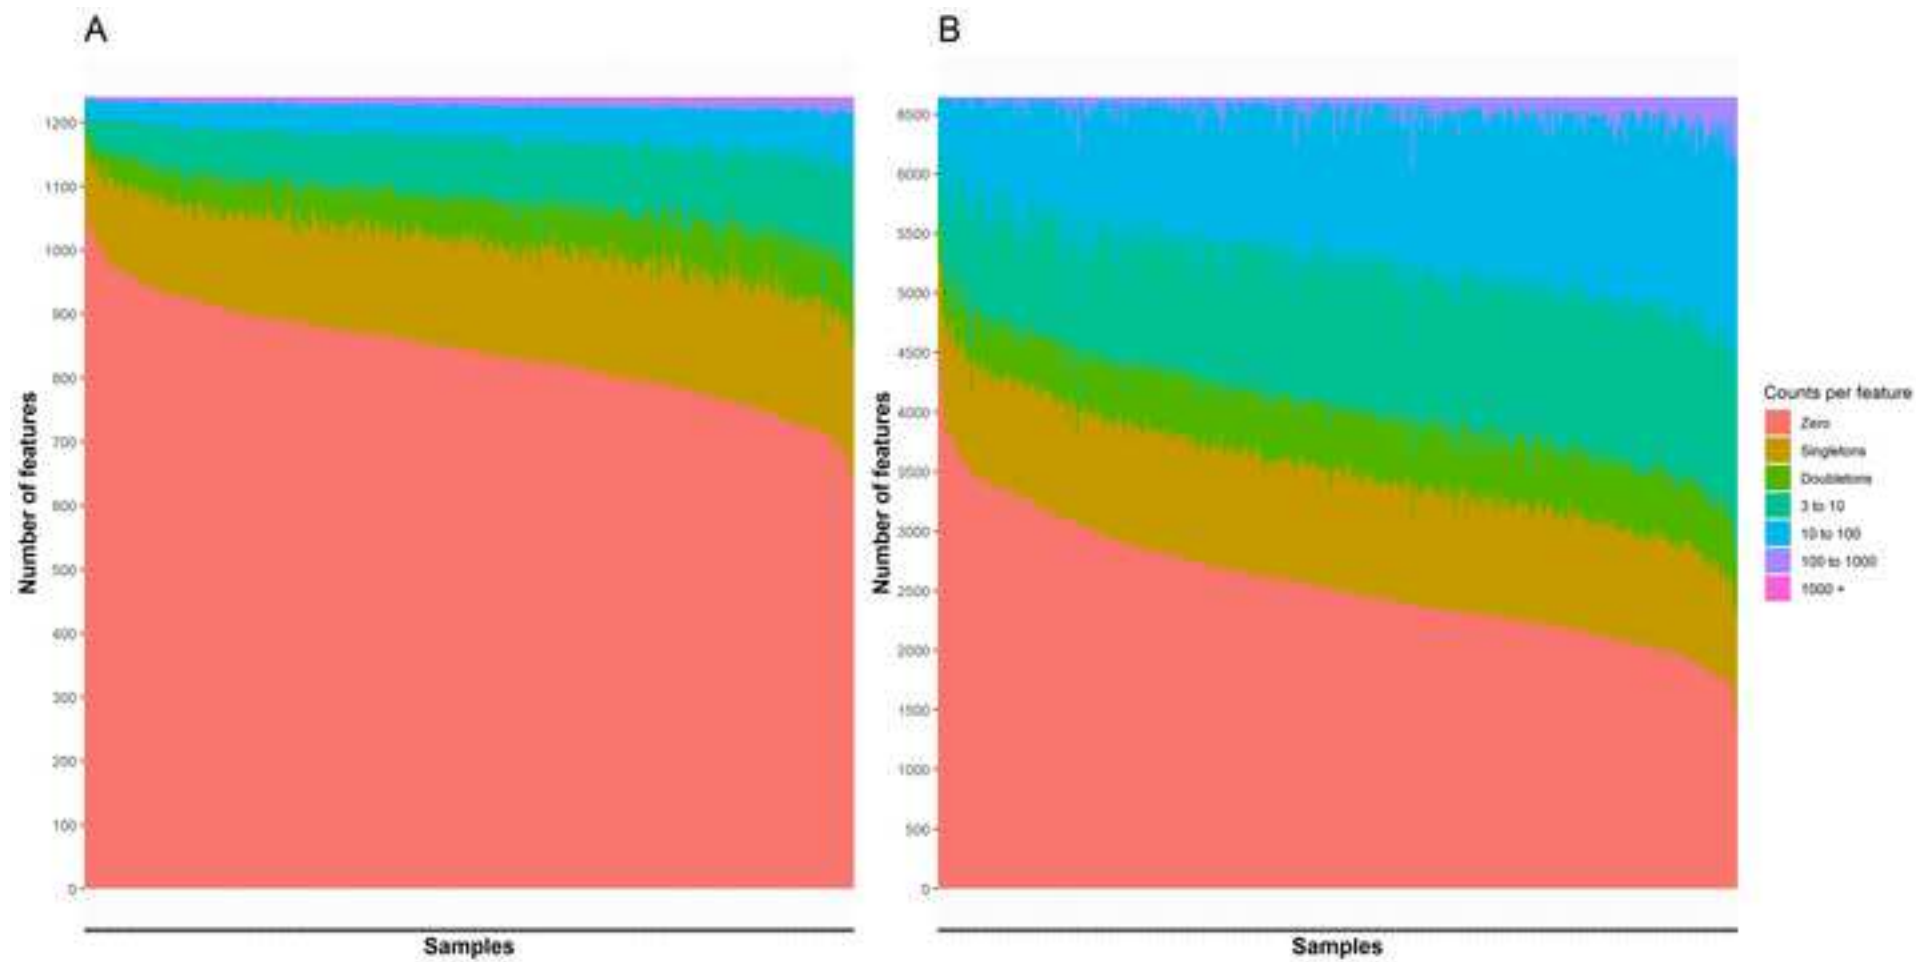



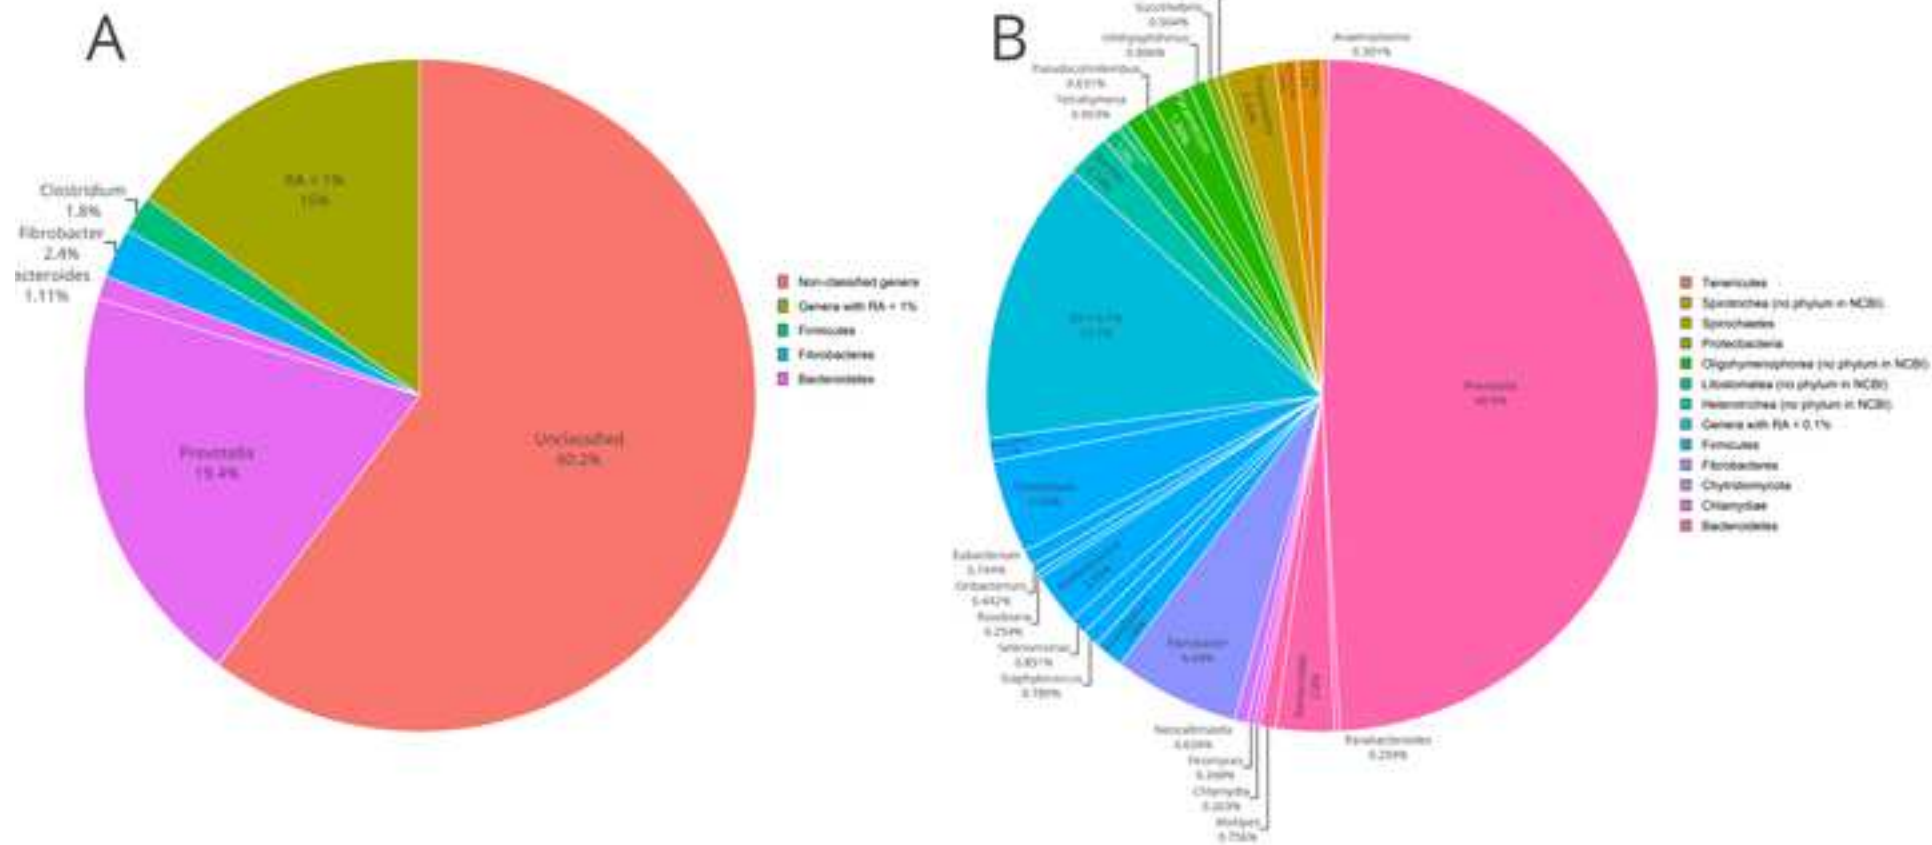

Figure 3

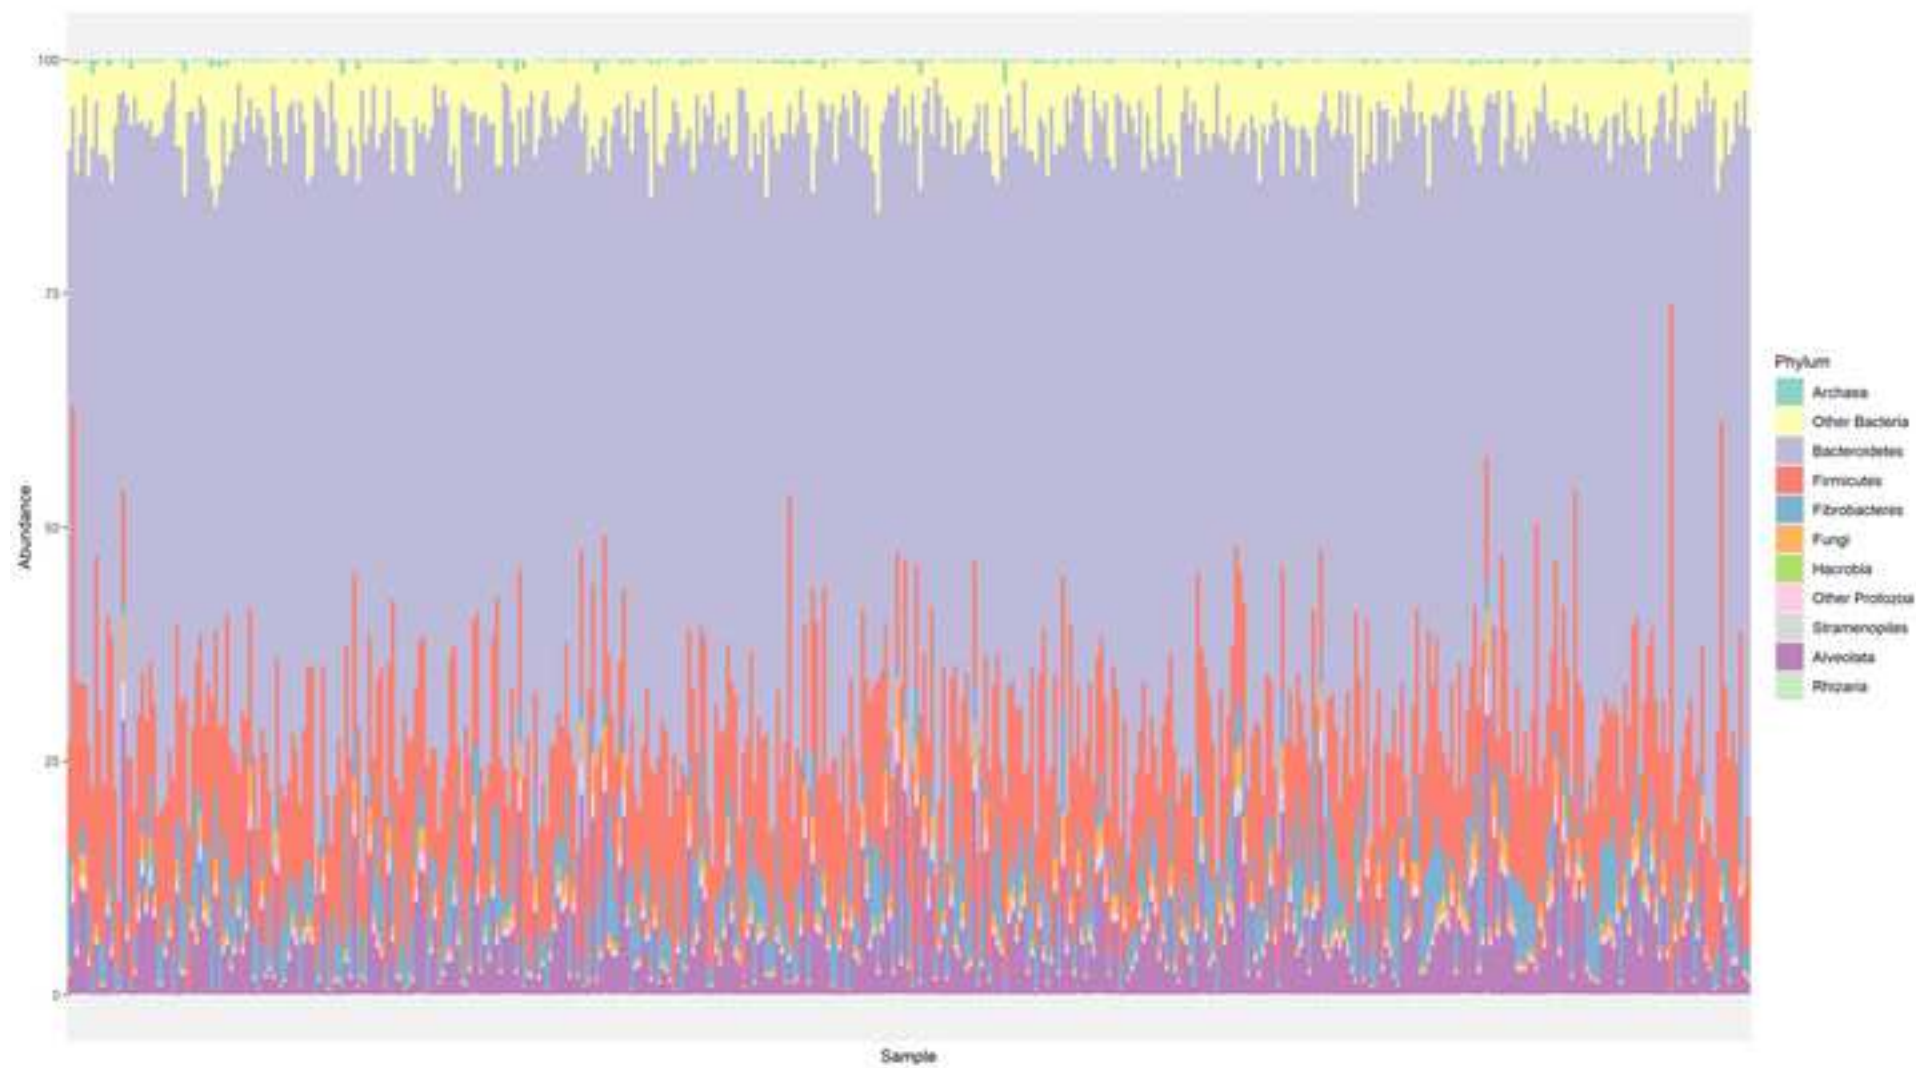

KEGG Pathway abundance treemap

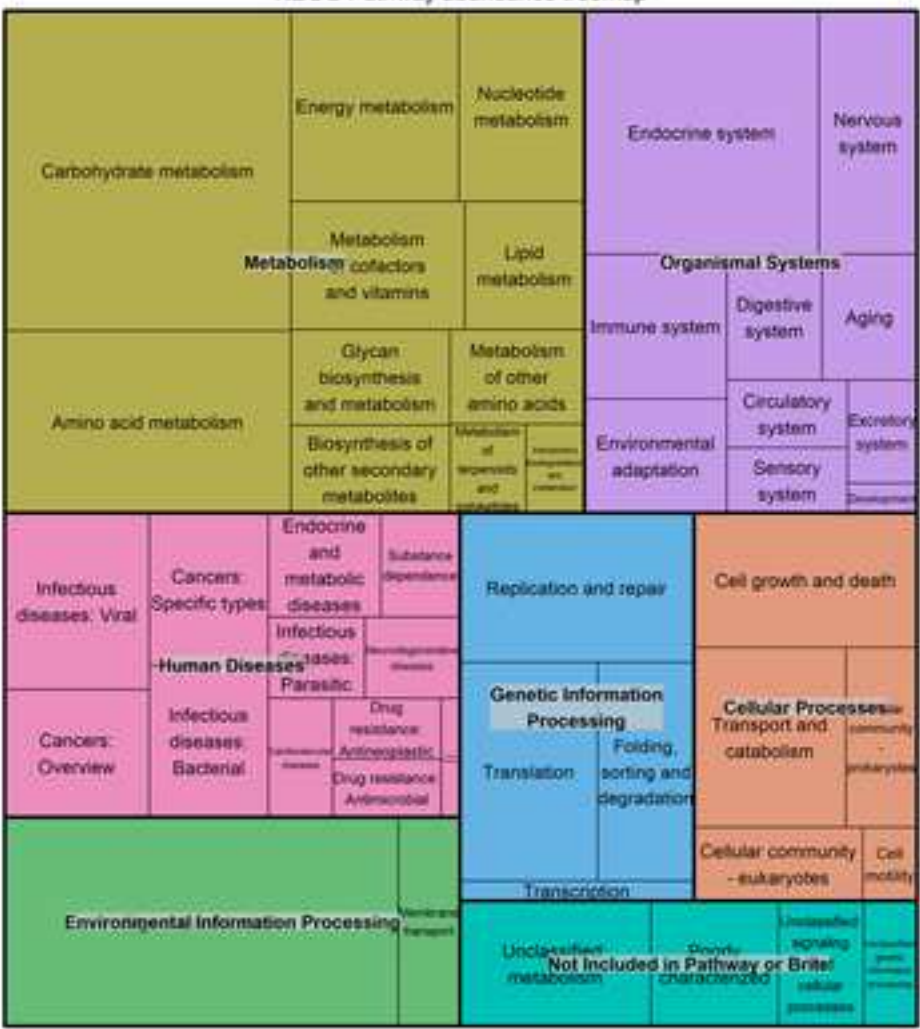

BRITE Hierarchies abundance treemap

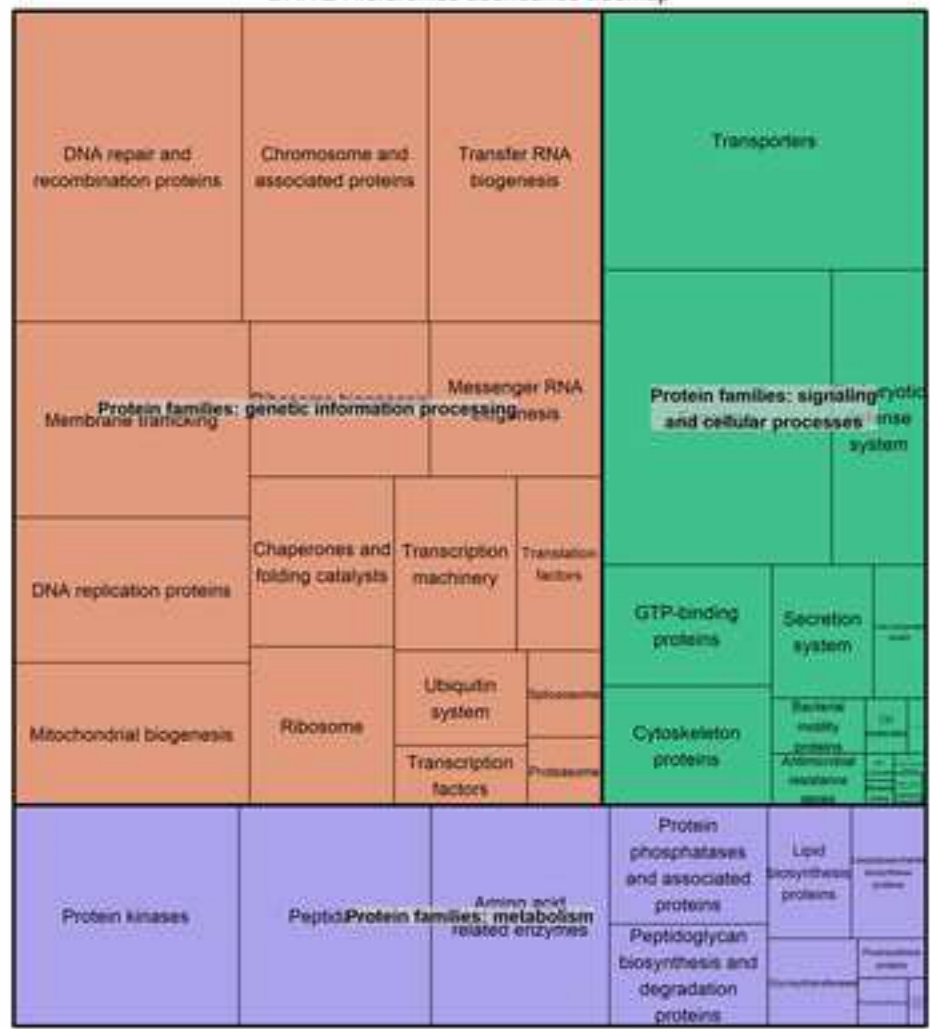



Figure 5

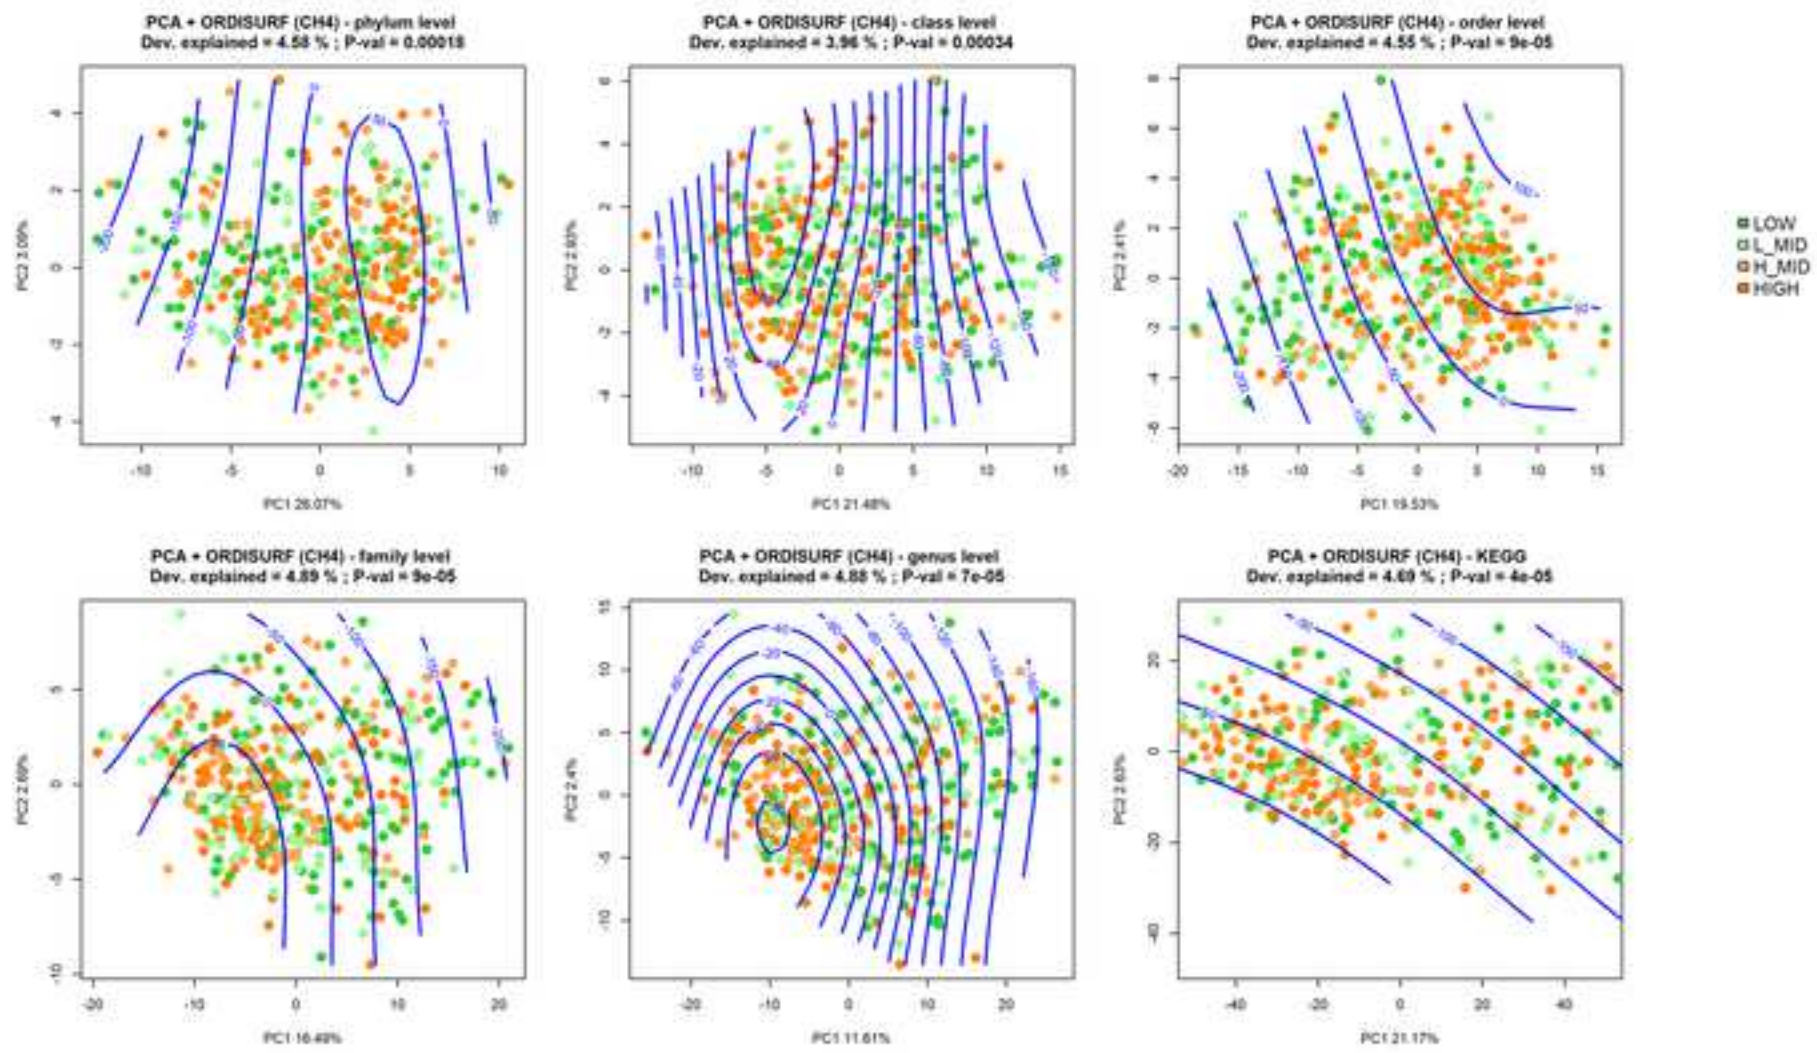

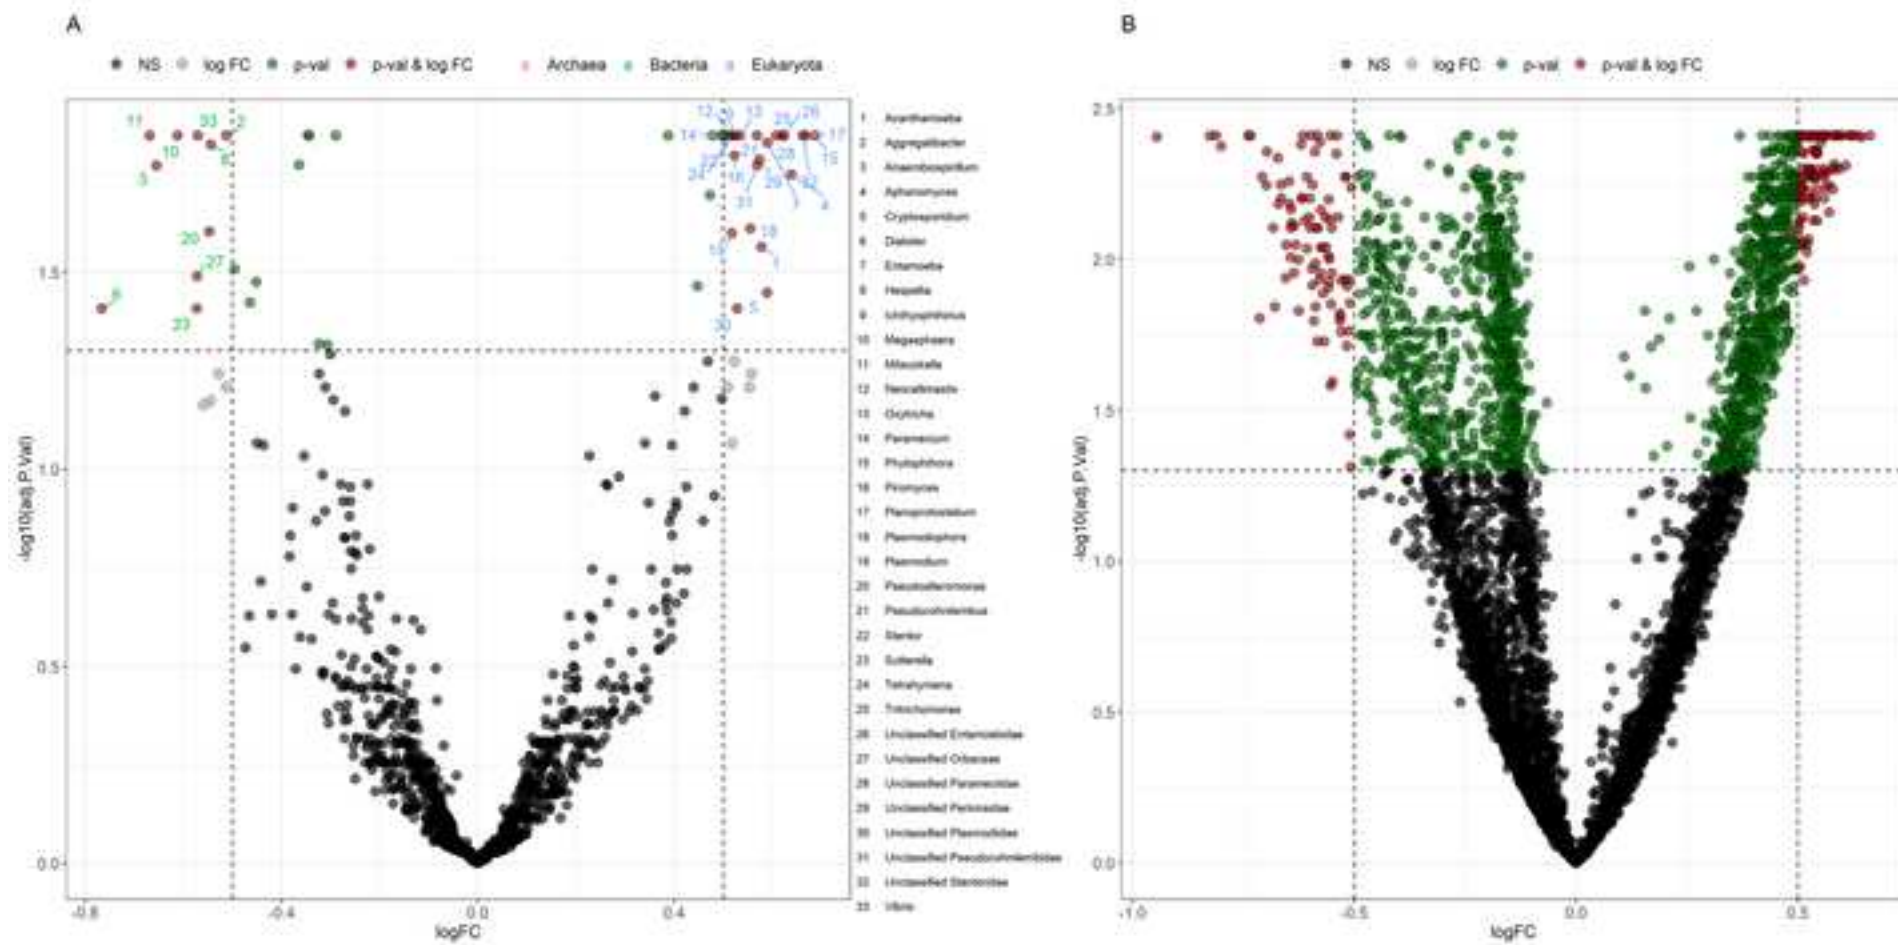

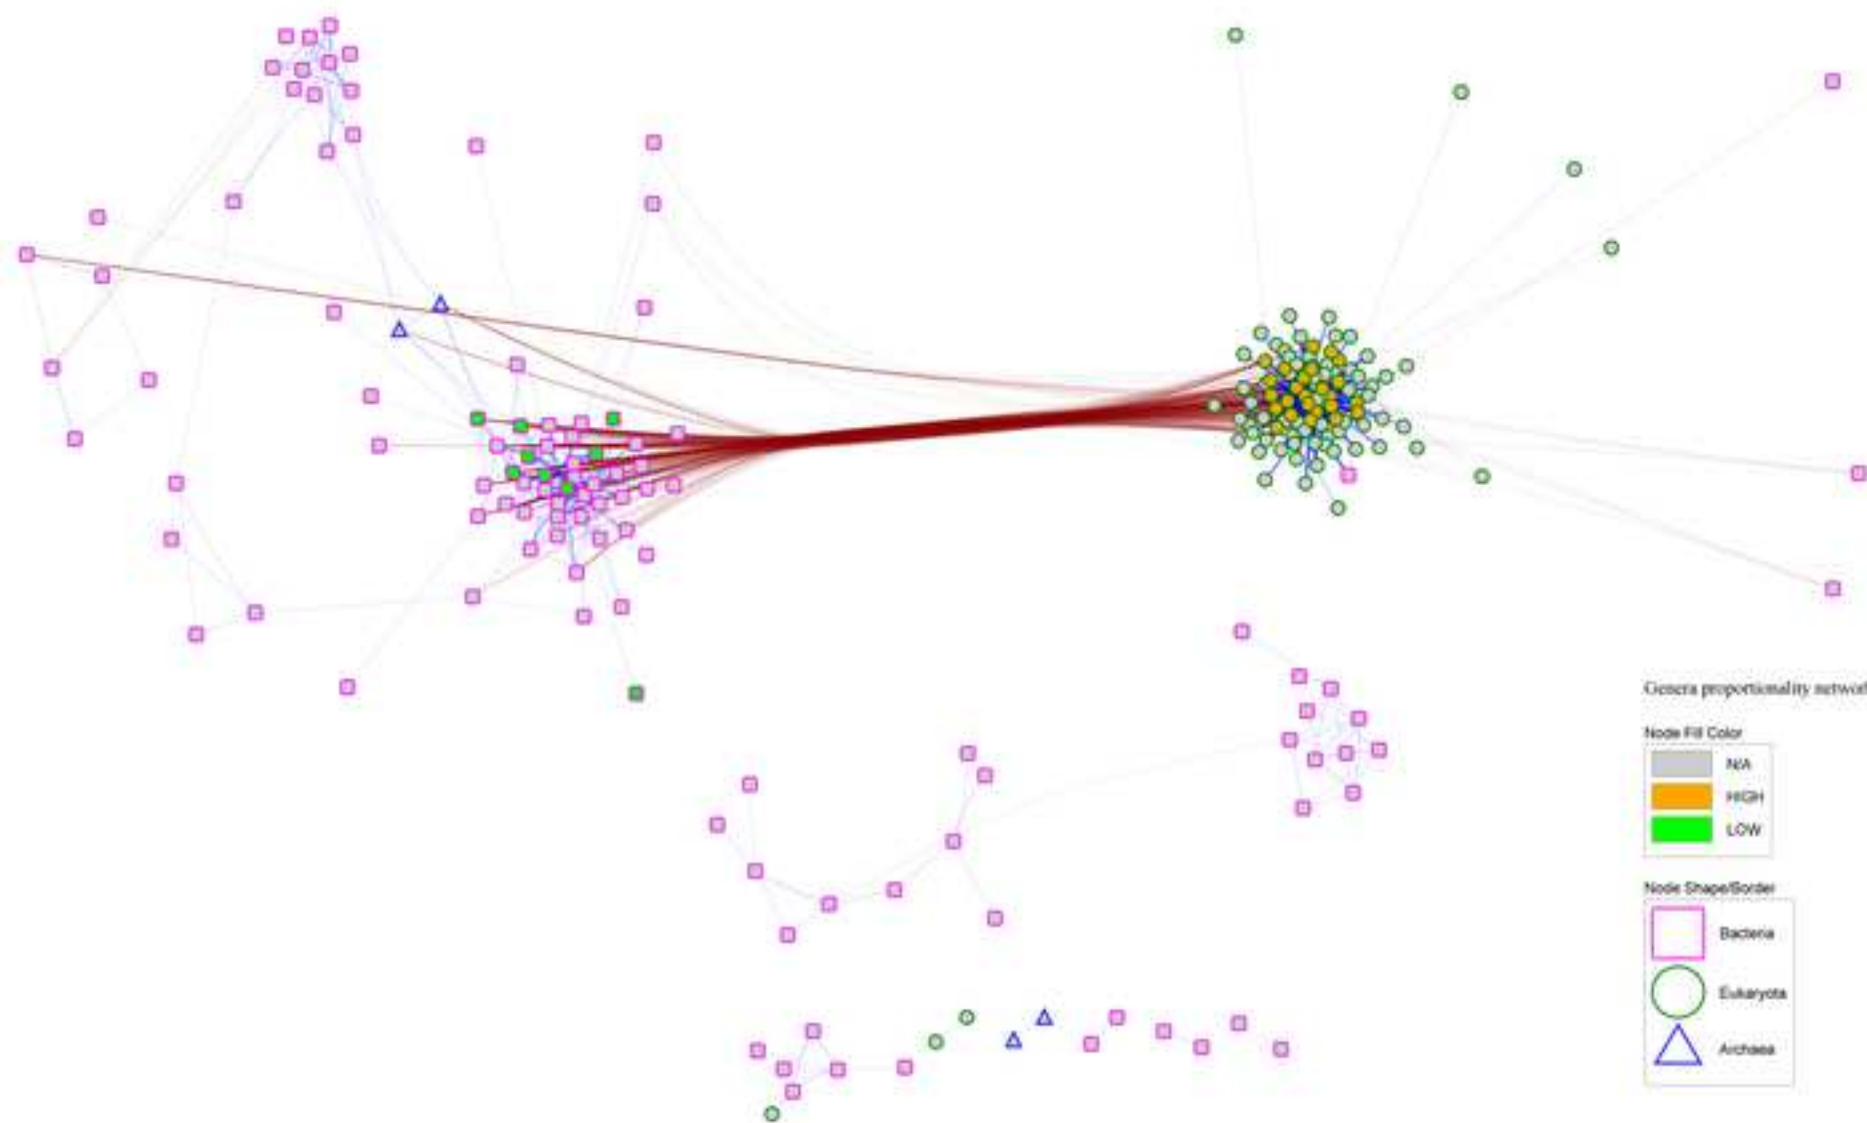

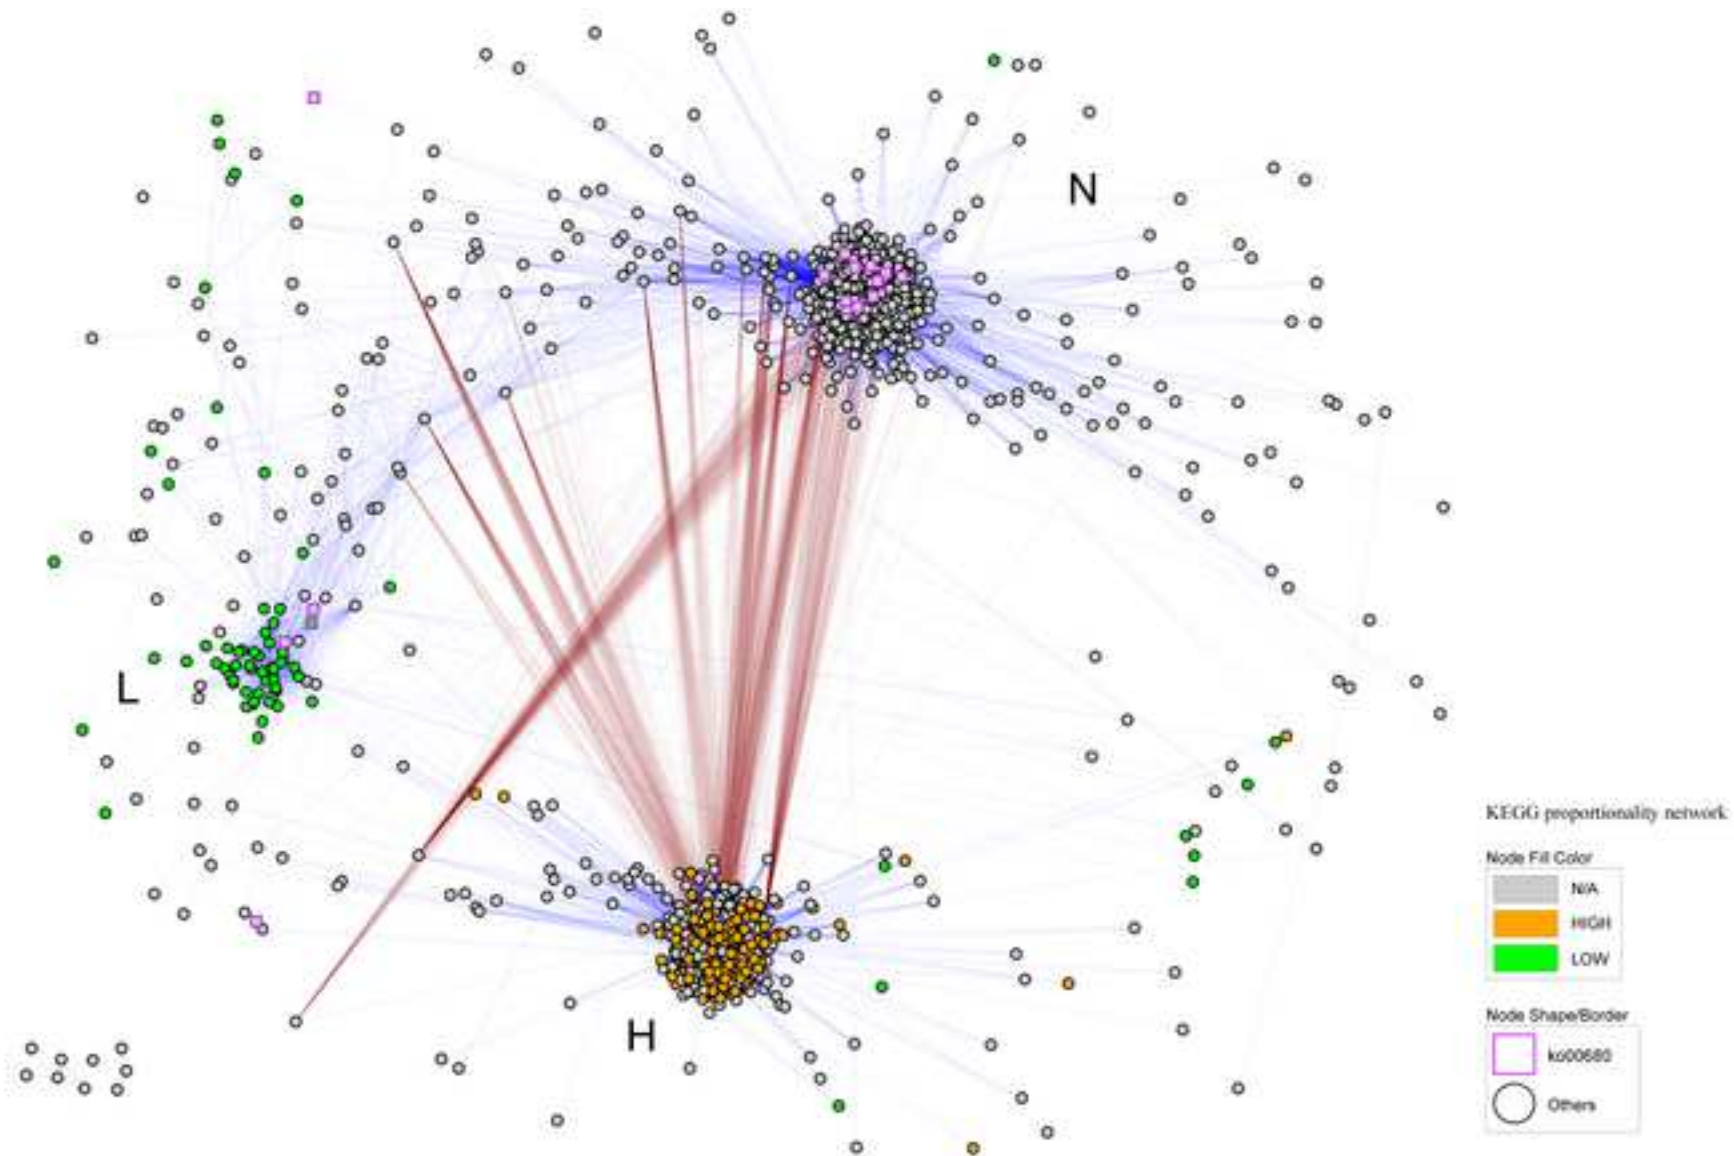







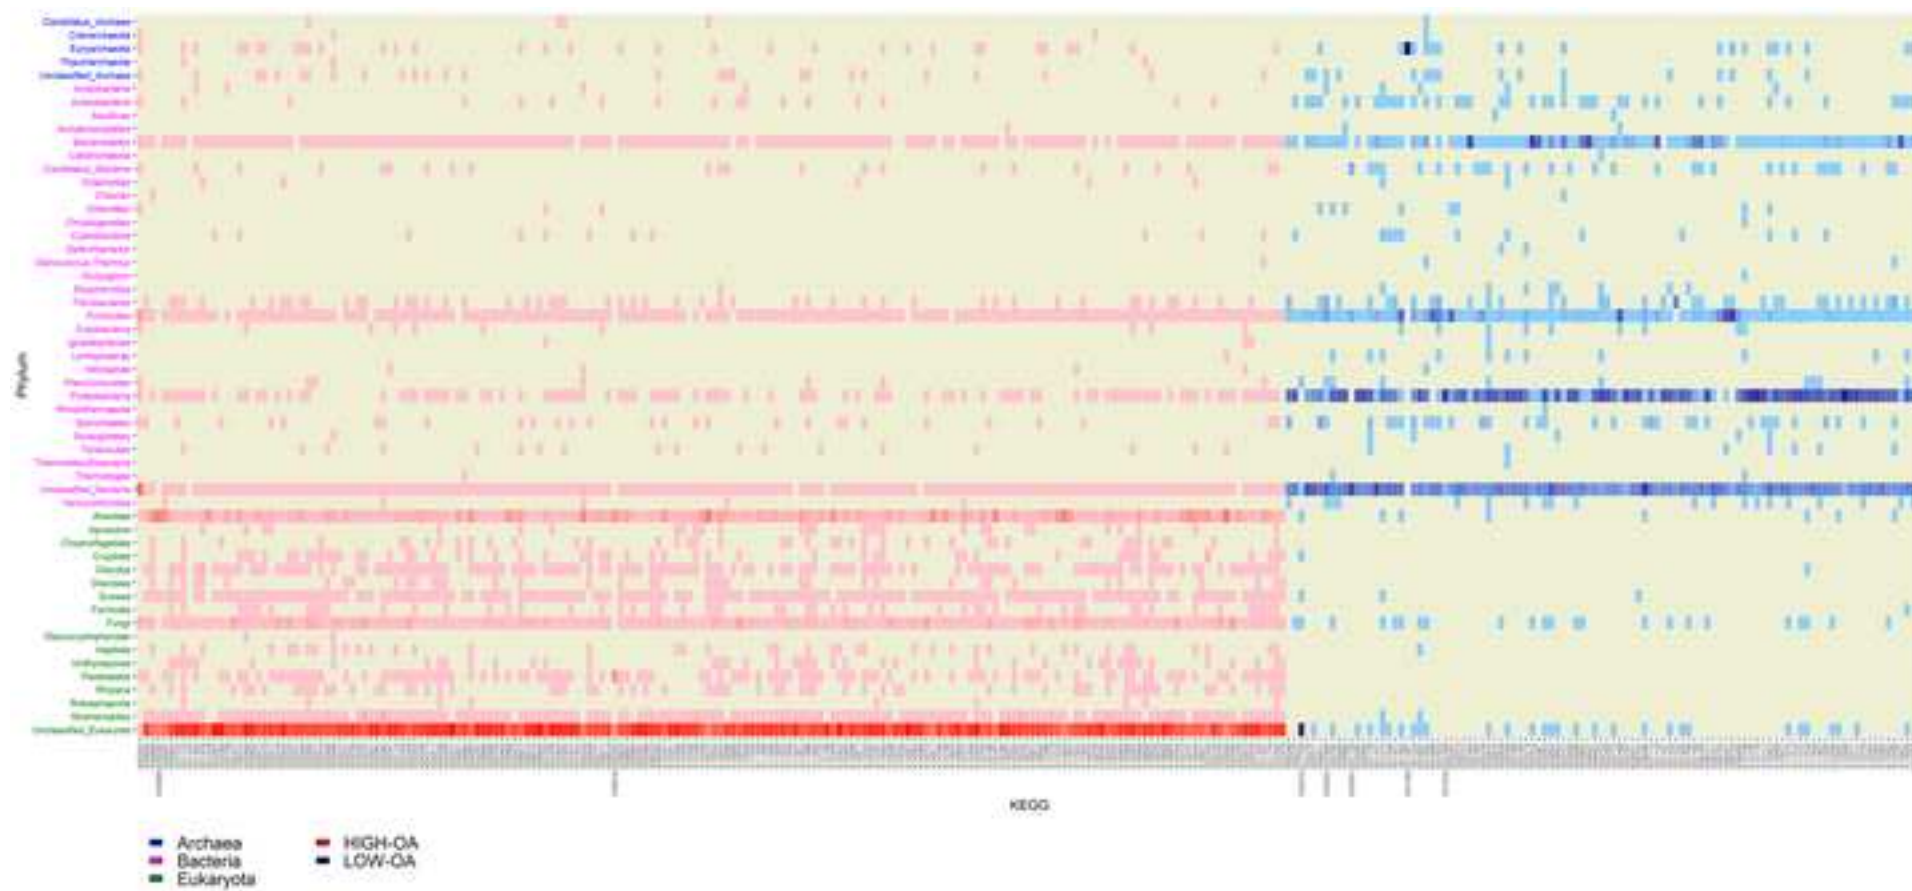

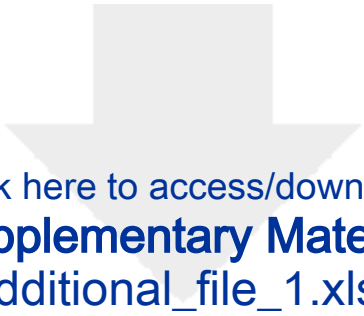

Click here to access/download  
**Supplementary Material**  
Additional\_file\_1.xlsx



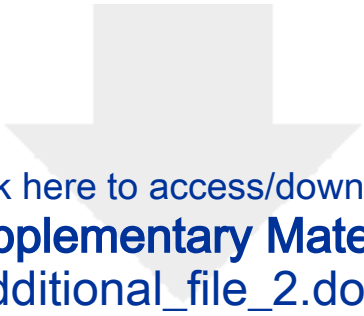

Click here to access/download  
**Supplementary Material**  
Additional\_file\_2.docx



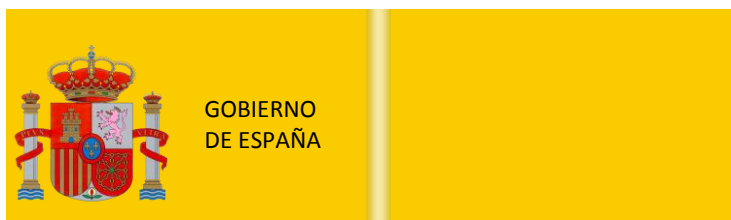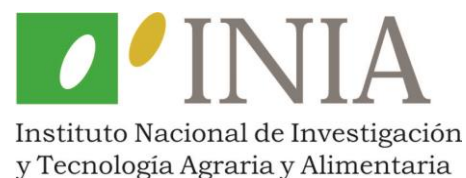

DEPARTAMENTO DE MEJORA GENETICA ANIMAL

Madrid, 02nd august, 2021

Dear Editor,

herewith, we submit our manuscript entitled "FUNGAL AND CILIATE PROTOZOA ARE THE MAIN RUMEN MICROBES ASSOCIATED WITH METHANE EMISSIONS IN DAIRY CATTLE", to be considered for publication in GigaScience.

The manuscript we are enclosing is a full research paper on animal microbiome, which reports results of an experiment performed using 437 Holstein cows. We explored the differences in the ruminal microbiota composition between cows with different methane emission levels, using nanopore technologies for long-reads metagenome sequencing and subsequent compositional data analysis. The uniqueness of the current research is that we generated one of the largest nanopore long-read ruminal metagenome datasets currently available, providing a comprehensive approach to rumen microbial ecosystem, accounting representative microbial taxonomy within all superkingdoms, as well as their potential metabolic activity related to methane emissions. Our results contribute to a better understanding of the complex interactions between rumen microbiota and host phenotype.

All authors are aware of the paper submission and agreed to be listed as co-authors, as affirmed by my signature as corresponding author, and there is no conflict of interest that would prejudice the information offered in the paper.

It is our understanding that this manuscript clearly fits in the journal scope and that it provides new, coherent, and sound addition to scientific knowledge. We sincerely hope you will find the paper a useful contribution to the field and adequate for publication in the journal.

Data are already uploaded in ENA, and they will be made available upon acceptance of the study.

Thank you in advance for considering this manuscript.

Sincerely,

Dr. Óscar González-Recio  
Senior Research Scientist,  
SGIT – INIA

Adrián López-García  
PhD student,  
SGIT – INIA
