# Supplementary material for: Fungal and ciliate protozoa are the main rumen microbes associated with methane emissions in dairy cattle
Source: PubMed Central journal article supplement (PMC8848325; doi:10.1093/gigascience/giab088), 2022-01-25
Supplement: giab088_giga-d-21-00239_revision_1.pdf [file giab088_giga-d-21-00239_revision_1.pdf]

# GigaScience

## Fungal and ciliate protozoa are the main rumen microbes associated with methane emissions in dairy cattle --Manuscript Draft--

|                                                      |                                                                                                                                                                                                                                                                                                                                                                                                                                                                                                                                                                                                                                                                                                                                                                                                                                                                                                                                                                                                                                                                                                                                                                                                                                                                                                                                                                                                                                                                                                                                                                                                                                                                                                                                                                                                                                                                                                                                                                                                                                                                                                                                                                                                                                                                                                                                                                                                                                                                                                                                                                                                                                                           |                        |
|------------------------------------------------------|-----------------------------------------------------------------------------------------------------------------------------------------------------------------------------------------------------------------------------------------------------------------------------------------------------------------------------------------------------------------------------------------------------------------------------------------------------------------------------------------------------------------------------------------------------------------------------------------------------------------------------------------------------------------------------------------------------------------------------------------------------------------------------------------------------------------------------------------------------------------------------------------------------------------------------------------------------------------------------------------------------------------------------------------------------------------------------------------------------------------------------------------------------------------------------------------------------------------------------------------------------------------------------------------------------------------------------------------------------------------------------------------------------------------------------------------------------------------------------------------------------------------------------------------------------------------------------------------------------------------------------------------------------------------------------------------------------------------------------------------------------------------------------------------------------------------------------------------------------------------------------------------------------------------------------------------------------------------------------------------------------------------------------------------------------------------------------------------------------------------------------------------------------------------------------------------------------------------------------------------------------------------------------------------------------------------------------------------------------------------------------------------------------------------------------------------------------------------------------------------------------------------------------------------------------------------------------------------------------------------------------------------------------------|------------------------|
| <b>Manuscript Number:</b>                            | GIGA-D-21-00239R1                                                                                                                                                                                                                                                                                                                                                                                                                                                                                                                                                                                                                                                                                                                                                                                                                                                                                                                                                                                                                                                                                                                                                                                                                                                                                                                                                                                                                                                                                                                                                                                                                                                                                                                                                                                                                                                                                                                                                                                                                                                                                                                                                                                                                                                                                                                                                                                                                                                                                                                                                                                                                                         |                        |
| <b>Full Title:</b>                                   | Fungal and ciliate protozoa are the main rumen microbes associated with methane emissions in dairy cattle                                                                                                                                                                                                                                                                                                                                                                                                                                                                                                                                                                                                                                                                                                                                                                                                                                                                                                                                                                                                                                                                                                                                                                                                                                                                                                                                                                                                                                                                                                                                                                                                                                                                                                                                                                                                                                                                                                                                                                                                                                                                                                                                                                                                                                                                                                                                                                                                                                                                                                                                                 |                        |
| <b>Article Type:</b>                                 | Research                                                                                                                                                                                                                                                                                                                                                                                                                                                                                                                                                                                                                                                                                                                                                                                                                                                                                                                                                                                                                                                                                                                                                                                                                                                                                                                                                                                                                                                                                                                                                                                                                                                                                                                                                                                                                                                                                                                                                                                                                                                                                                                                                                                                                                                                                                                                                                                                                                                                                                                                                                                                                                                  |                        |
| <b>Funding Information:</b>                          | Ministerio de Ciencia, Innovación y Universidades (RTI2018-096487-RC33)                                                                                                                                                                                                                                                                                                                                                                                                                                                                                                                                                                                                                                                                                                                                                                                                                                                                                                                                                                                                                                                                                                                                                                                                                                                                                                                                                                                                                                                                                                                                                                                                                                                                                                                                                                                                                                                                                                                                                                                                                                                                                                                                                                                                                                                                                                                                                                                                                                                                                                                                                                                   | Not applicable         |
|                                                      | Ministerio de Economía y Competitividad (RTA2015-00022-C03-02)                                                                                                                                                                                                                                                                                                                                                                                                                                                                                                                                                                                                                                                                                                                                                                                                                                                                                                                                                                                                                                                                                                                                                                                                                                                                                                                                                                                                                                                                                                                                                                                                                                                                                                                                                                                                                                                                                                                                                                                                                                                                                                                                                                                                                                                                                                                                                                                                                                                                                                                                                                                            | Not applicable         |
|                                                      | INIA: Instituto Nacional de Investigación y Tecnología Agraria y Alimentaria (reference FPI-SGIT2016-06)                                                                                                                                                                                                                                                                                                                                                                                                                                                                                                                                                                                                                                                                                                                                                                                                                                                                                                                                                                                                                                                                                                                                                                                                                                                                                                                                                                                                                                                                                                                                                                                                                                                                                                                                                                                                                                                                                                                                                                                                                                                                                                                                                                                                                                                                                                                                                                                                                                                                                                                                                  | Mr Adrián López-García |
| <b>Abstract:</b>                                     | <p>Background: Mitigating the effects of global warming has become the main challenge for humanity in the last decades. Livestock farming contributes to greenhouse gas emissions, with an important output of methane from enteric fermentation processes, mostly in ruminants. As ruminal microbiota is directly involved in digestive fermentation processes and methane biosynthesis, understanding the ecological relationships between rumen microorganisms and their active metabolic pathways is essential for reducing emissions. This study analyzed whole rumen metagenome using long reads and considering its compositional nature in order to disentangle the role of rumen microbes in methane emissions.</p> <p>Results: The beta-diversity analyses suggested an association between methane production and overall microbiota composition (<math>0.01 &lt; R^2 &lt; 0.02</math>). Differential abundance analysis identified 36 genera and 279 KEGGs as significantly associated to methane production (<math>P_{adj} &lt; 0.05</math>). Those genera associated to high methane production were Eukaryota from Alveolata and Fungi clades, while Bacteria were associated to low methane emissions. The genus-level association network showed two clusters grouping Eukaryota and Bacteria, respectively. Regarding microbial gene functions, 41 KEGGs resulted to be differentially abundant between low and high emission animals, and were mainly involved in metabolic pathways. No KEGGs included in the methane metabolism pathway (ko00680) were detected as associated to high methane emissions. The KEGG network showed three clusters grouping KEGGs associated to high emissions, low emissions and not differentially abundant in either of them. A deeper analysis of the differentially abundant KEGGs revealed that genes related with anaerobic respiration through nitrate degradation were more abundant in low emissions animals.</p> <p>Conclusions: Methane emissions are largely associated to the relative abundance of ciliate and fungi. The role of nitrate electron acceptors can be particularly important as this respiration mechanism directly competes with methanogenesis. Therefore, whole metagenome sequencing is necessary to jointly consider relative abundance of Bacteria, Archaea and Eukaryota in the statistical analyses. Nutritional and genetic strategies to reduce CH<sub>4</sub> emissions should focus on reducing the relative abundance of Alveolata and Fungi in the rumen. This experiment has generated the largest ONT ruminal metagenomic dataset currently available.</p> |                        |
| <b>Corresponding Author:</b>                         | Oscar Gonzalez-Recio<br>INIA: Instituto Nacional de Investigación y Tecnología Agraria y Alimentaria<br>Madrid, Ma SPAIN                                                                                                                                                                                                                                                                                                                                                                                                                                                                                                                                                                                                                                                                                                                                                                                                                                                                                                                                                                                                                                                                                                                                                                                                                                                                                                                                                                                                                                                                                                                                                                                                                                                                                                                                                                                                                                                                                                                                                                                                                                                                                                                                                                                                                                                                                                                                                                                                                                                                                                                                  |                        |
| <b>Corresponding Author Secondary Information:</b>   |                                                                                                                                                                                                                                                                                                                                                                                                                                                                                                                                                                                                                                                                                                                                                                                                                                                                                                                                                                                                                                                                                                                                                                                                                                                                                                                                                                                                                                                                                                                                                                                                                                                                                                                                                                                                                                                                                                                                                                                                                                                                                                                                                                                                                                                                                                                                                                                                                                                                                                                                                                                                                                                           |                        |
| <b>Corresponding Author's Institution:</b>           | INIA: Instituto Nacional de Investigación y Tecnología Agraria y Alimentaria                                                                                                                                                                                                                                                                                                                                                                                                                                                                                                                                                                                                                                                                                                                                                                                                                                                                                                                                                                                                                                                                                                                                                                                                                                                                                                                                                                                                                                                                                                                                                                                                                                                                                                                                                                                                                                                                                                                                                                                                                                                                                                                                                                                                                                                                                                                                                                                                                                                                                                                                                                              |                        |
| <b>Corresponding Author's Secondary Institution:</b> |                                                                                                                                                                                                                                                                                                                                                                                                                                                                                                                                                                                                                                                                                                                                                                                                                                                                                                                                                                                                                                                                                                                                                                                                                                                                                                                                                                                                                                                                                                                                                                                                                                                                                                                                                                                                                                                                                                                                                                                                                                                                                                                                                                                                                                                                                                                                                                                                                                                                                                                                                                                                                                                           |                        |

|                                                |                                                                                                                                                                                                                                                                                                                                                                                                                                                                                                                                                                                                                                                                                                                                                                                                                                                                                                                                                                                                                                                                                                                                                                                                                                                                                                                                                                                                                                                                                                                                                                                                                                                                                                                                                                                                                                                                                                                                                                                                                                                                                                                                                                                                                                                                                                                                                                                                                                                                                                                                                                                                                                                                                                                                                              |
|------------------------------------------------|--------------------------------------------------------------------------------------------------------------------------------------------------------------------------------------------------------------------------------------------------------------------------------------------------------------------------------------------------------------------------------------------------------------------------------------------------------------------------------------------------------------------------------------------------------------------------------------------------------------------------------------------------------------------------------------------------------------------------------------------------------------------------------------------------------------------------------------------------------------------------------------------------------------------------------------------------------------------------------------------------------------------------------------------------------------------------------------------------------------------------------------------------------------------------------------------------------------------------------------------------------------------------------------------------------------------------------------------------------------------------------------------------------------------------------------------------------------------------------------------------------------------------------------------------------------------------------------------------------------------------------------------------------------------------------------------------------------------------------------------------------------------------------------------------------------------------------------------------------------------------------------------------------------------------------------------------------------------------------------------------------------------------------------------------------------------------------------------------------------------------------------------------------------------------------------------------------------------------------------------------------------------------------------------------------------------------------------------------------------------------------------------------------------------------------------------------------------------------------------------------------------------------------------------------------------------------------------------------------------------------------------------------------------------------------------------------------------------------------------------------------------|
| <b>First Author:</b>                           | Adrián López-García                                                                                                                                                                                                                                                                                                                                                                                                                                                                                                                                                                                                                                                                                                                                                                                                                                                                                                                                                                                                                                                                                                                                                                                                                                                                                                                                                                                                                                                                                                                                                                                                                                                                                                                                                                                                                                                                                                                                                                                                                                                                                                                                                                                                                                                                                                                                                                                                                                                                                                                                                                                                                                                                                                                                          |
| <b>First Author Secondary Information:</b>     |                                                                                                                                                                                                                                                                                                                                                                                                                                                                                                                                                                                                                                                                                                                                                                                                                                                                                                                                                                                                                                                                                                                                                                                                                                                                                                                                                                                                                                                                                                                                                                                                                                                                                                                                                                                                                                                                                                                                                                                                                                                                                                                                                                                                                                                                                                                                                                                                                                                                                                                                                                                                                                                                                                                                                              |
| <b>Order of Authors:</b>                       | Adrián López-García                                                                                                                                                                                                                                                                                                                                                                                                                                                                                                                                                                                                                                                                                                                                                                                                                                                                                                                                                                                                                                                                                                                                                                                                                                                                                                                                                                                                                                                                                                                                                                                                                                                                                                                                                                                                                                                                                                                                                                                                                                                                                                                                                                                                                                                                                                                                                                                                                                                                                                                                                                                                                                                                                                                                          |
|                                                | Alejandro Saborío-Montero                                                                                                                                                                                                                                                                                                                                                                                                                                                                                                                                                                                                                                                                                                                                                                                                                                                                                                                                                                                                                                                                                                                                                                                                                                                                                                                                                                                                                                                                                                                                                                                                                                                                                                                                                                                                                                                                                                                                                                                                                                                                                                                                                                                                                                                                                                                                                                                                                                                                                                                                                                                                                                                                                                                                    |
|                                                | Mónica Gutiérrez-Rivas                                                                                                                                                                                                                                                                                                                                                                                                                                                                                                                                                                                                                                                                                                                                                                                                                                                                                                                                                                                                                                                                                                                                                                                                                                                                                                                                                                                                                                                                                                                                                                                                                                                                                                                                                                                                                                                                                                                                                                                                                                                                                                                                                                                                                                                                                                                                                                                                                                                                                                                                                                                                                                                                                                                                       |
|                                                | Raquel Atxaerandio                                                                                                                                                                                                                                                                                                                                                                                                                                                                                                                                                                                                                                                                                                                                                                                                                                                                                                                                                                                                                                                                                                                                                                                                                                                                                                                                                                                                                                                                                                                                                                                                                                                                                                                                                                                                                                                                                                                                                                                                                                                                                                                                                                                                                                                                                                                                                                                                                                                                                                                                                                                                                                                                                                                                           |
|                                                | Idoia Goiri                                                                                                                                                                                                                                                                                                                                                                                                                                                                                                                                                                                                                                                                                                                                                                                                                                                                                                                                                                                                                                                                                                                                                                                                                                                                                                                                                                                                                                                                                                                                                                                                                                                                                                                                                                                                                                                                                                                                                                                                                                                                                                                                                                                                                                                                                                                                                                                                                                                                                                                                                                                                                                                                                                                                                  |
|                                                | Aser García-Rodríguez                                                                                                                                                                                                                                                                                                                                                                                                                                                                                                                                                                                                                                                                                                                                                                                                                                                                                                                                                                                                                                                                                                                                                                                                                                                                                                                                                                                                                                                                                                                                                                                                                                                                                                                                                                                                                                                                                                                                                                                                                                                                                                                                                                                                                                                                                                                                                                                                                                                                                                                                                                                                                                                                                                                                        |
|                                                | José A. Jiménez-Montero                                                                                                                                                                                                                                                                                                                                                                                                                                                                                                                                                                                                                                                                                                                                                                                                                                                                                                                                                                                                                                                                                                                                                                                                                                                                                                                                                                                                                                                                                                                                                                                                                                                                                                                                                                                                                                                                                                                                                                                                                                                                                                                                                                                                                                                                                                                                                                                                                                                                                                                                                                                                                                                                                                                                      |
|                                                | Carmen González                                                                                                                                                                                                                                                                                                                                                                                                                                                                                                                                                                                                                                                                                                                                                                                                                                                                                                                                                                                                                                                                                                                                                                                                                                                                                                                                                                                                                                                                                                                                                                                                                                                                                                                                                                                                                                                                                                                                                                                                                                                                                                                                                                                                                                                                                                                                                                                                                                                                                                                                                                                                                                                                                                                                              |
|                                                | Javier Tamames                                                                                                                                                                                                                                                                                                                                                                                                                                                                                                                                                                                                                                                                                                                                                                                                                                                                                                                                                                                                                                                                                                                                                                                                                                                                                                                                                                                                                                                                                                                                                                                                                                                                                                                                                                                                                                                                                                                                                                                                                                                                                                                                                                                                                                                                                                                                                                                                                                                                                                                                                                                                                                                                                                                                               |
|                                                | Fernando Puente-Sánchez                                                                                                                                                                                                                                                                                                                                                                                                                                                                                                                                                                                                                                                                                                                                                                                                                                                                                                                                                                                                                                                                                                                                                                                                                                                                                                                                                                                                                                                                                                                                                                                                                                                                                                                                                                                                                                                                                                                                                                                                                                                                                                                                                                                                                                                                                                                                                                                                                                                                                                                                                                                                                                                                                                                                      |
|                                                | Magdalena Serrano                                                                                                                                                                                                                                                                                                                                                                                                                                                                                                                                                                                                                                                                                                                                                                                                                                                                                                                                                                                                                                                                                                                                                                                                                                                                                                                                                                                                                                                                                                                                                                                                                                                                                                                                                                                                                                                                                                                                                                                                                                                                                                                                                                                                                                                                                                                                                                                                                                                                                                                                                                                                                                                                                                                                            |
|                                                | Rafael Carrasco                                                                                                                                                                                                                                                                                                                                                                                                                                                                                                                                                                                                                                                                                                                                                                                                                                                                                                                                                                                                                                                                                                                                                                                                                                                                                                                                                                                                                                                                                                                                                                                                                                                                                                                                                                                                                                                                                                                                                                                                                                                                                                                                                                                                                                                                                                                                                                                                                                                                                                                                                                                                                                                                                                                                              |
|                                                | Cristina Óvilo                                                                                                                                                                                                                                                                                                                                                                                                                                                                                                                                                                                                                                                                                                                                                                                                                                                                                                                                                                                                                                                                                                                                                                                                                                                                                                                                                                                                                                                                                                                                                                                                                                                                                                                                                                                                                                                                                                                                                                                                                                                                                                                                                                                                                                                                                                                                                                                                                                                                                                                                                                                                                                                                                                                                               |
|                                                | Oscar Gonzalez-Recio                                                                                                                                                                                                                                                                                                                                                                                                                                                                                                                                                                                                                                                                                                                                                                                                                                                                                                                                                                                                                                                                                                                                                                                                                                                                                                                                                                                                                                                                                                                                                                                                                                                                                                                                                                                                                                                                                                                                                                                                                                                                                                                                                                                                                                                                                                                                                                                                                                                                                                                                                                                                                                                                                                                                         |
| <b>Order of Authors Secondary Information:</b> |                                                                                                                                                                                                                                                                                                                                                                                                                                                                                                                                                                                                                                                                                                                                                                                                                                                                                                                                                                                                                                                                                                                                                                                                                                                                                                                                                                                                                                                                                                                                                                                                                                                                                                                                                                                                                                                                                                                                                                                                                                                                                                                                                                                                                                                                                                                                                                                                                                                                                                                                                                                                                                                                                                                                                              |
| <b>Response to Reviewers:</b>                  | <p>Reviewer #1:</p> <p>The manuscript by Lopez-Garcia et al "Fungal and ciliate protozoa are the main rumen microbes associated with methane emissions in dairy cattle" describes a study where a large dataset of nanopore data was generated from rumen samples. It clearly describes the various steps that were taken to analyse the data. Various aspects of importance were taken into consideration such as abundance normalisation, and significance adjustment for multiple hypothesis testing. This study gives insights into previously unknown correlations between methane emission and taxa (particularly eukaryotic organisms), and between methane emission and genes.</p> <p>Provided that some suggestions are implemented, this research paper should be considered for publication.</p> <p>Minor comments:</p> <p>Figures: almost all figures need some improvement:</p> <p>All figures: axes titles font, and particularly, axes labels font needs to be larger.</p> <p>All figures should be pdf/vectorised files. I (reviewer) see them all pixelated and I was not able to read most of the words.</p> <p>AU: Thank you for your comments, we have considered them carefully. They were really useful and helped improving the manuscript in a nice manner. We would like to point out that the journal's built-in pdf shows the figures in lower quality than the expected, but downloading them makes possible to visualize them with high quality. We believe that the format of the figures will be adapted during the editing process keeping the high quality of the figures provided.</p> <p>Figure 1: this figure could be removed as it is little informative. If kept, a title on top of each panel could be added to highlight the different nature of the features.</p> <p>AU: Thank you. This figure has been moved to supplementary material and completed with titles and pre-filtering count distribution. New Fig.: Supplementary Figure 1.</p> <p>Figure 2: 2A is little informative. I suggest keeping 2B, but visualized as a treemap instead, much more readable than a pie chart.</p> <p>AU: Changes applied. New Fig.: Figure 1.</p> <p>Figure 3: is there a message in this figure that has not already been made broadly explicit in the manuscript? If not, I suggest removing it or keep it as a supplementary figure.</p> <p>AU: We believe that this figure visualizes nicely what is described in the text. However, we moved it to supplementary material and re-ordered samples by increasing RA of Bacteroidetes for a better difference appreciation. Please see new Fig.: Supplementary Figure 2.</p> <p>A figure to report the core microbiome composition (bact, euk, and arch) as reported</p> |

between line 131-138 would be more informative than the current figures 1,2A, and 3.  
AU: The composition percentages in the text are the ones represented in the former figure.

Figure 6: unreadable text right of 6A.  
AU: The font size was slightly increased, but as said before, downloading the figures might allow to visualize it correctly. Please see new Fig.: Figure 4.

Figure 7: there are node fill colours that do not match the colours shown in the legend. Shouldn't the node fill colours be orange, green, grey (high, low, ns)?  
AU: The nodes are filled correctly. Not every node in the clusters belong to the HIGH or LOW categories, as significant DA was not detected for every represented genus, but every HIGH or LOW node belong to the same cluster. Note that co-abundance proportionalities (i.e., edges) range from 0.4 to 1 in absolute values, as stated in methods (line 552), so edges connecting an orange node (i.e., over-abundant in HIGH group) and a grey node (i.e., not significantly DA:  $p\text{-val} > 0.05$  &  $|\log_2FC| < 0.5$ ) might be co-abundant but in a lesser grade. Please see new Fig.: Figure 5.

Line 46: differentially abundant between low and high emission animals? Needs to be made explicit.  
AU: Changes applied (Line 44).

Line 124: RA acronym has not been introduced before  
AU: Change applied by adding a sentence before the first RA occurrence (line 117).

Line 143: What is the N50 of these reads? N50 and L50 could be reported.  
AU: We added N50 values for both taxonomy-mapped and KEGG-mapped reads (lines 107 and 138).

Line 149: Could "most" here be made explicit in numbers (i.e. percentages)?  
AU: Changes applied (line 143): "A 26% of the rumen metagenome functions [...]".

Line 150: Explicit what falls within cellular generic processes (or sub groups here of) in numbers (i.e. percentages)?  
AU: Changes applied by adding percentages to each type of cellular process (lines 145-147).

Line 155: PCA acronym first time appearance; needs introduction.  
AU: Change applied.

Line 170: I assume p-values in Table 1 have been adjusted for FDR with the BH method as described in the methods. If not, adjusted p-values should (also) be reported. Also, p-value adjustment method could be mentioned either here or in the Table caption.  
AU: In this case, each PERMANOVA (phylum, class, order, etc.) was run separately with differently grouped datasets. Note that in each analyses the dependent variable are the microbiota composition dissimilarities between samples, at each respective taxonomic level. Independent variables are only three, (SL, NL and CH4), so BH correction is not required. P-values are outputted by `vegan::adonis` function in an ANOVA-like table, as described in documentation [Anderson, 2001; McArdle & Anderson, 2001].

Line 171-172: correlation is reported between parentheses when a statement about variance is made. Parentheses containing the correlation metric should be reported before the comma, while variance should be reported at the end of the sentence.  
AU: The sentence has been clarified. P-values for methane effect are now reported before the comma and R2 indicating the proportion of variance explained is kept at the end of the sentence.

Line 179-181: very interesting findings!  
AU: Thank you!

Line 182-183: sentence structure needs revisiting.  
AU: Changes applied (lines 178-179): "We classified these genera according to their respective overabundance (OA) in the LOW or HIGH emissions groups".

Line 225-226: CLR "helps" but does not avoid compositional artefacts, and therefore it does not avoid spurious correlations. See Quinn et al (2021) "A Critique of Differential Abundance Analysis, and Advocacy for an Alternative" and his previous works  
AU: Indeed, the word "avoid" was not correct in this sentence, changes have been made to suggest helping instead of total elimination.

Line 291-293: sentence structure needs revisiting.  
AU: Changes applied (lines 332-335): "Pathways related to pathogenic activity were also found, in agreement with the RA of several genera that include known pathogenic species (e.g. *Vibrio*, *Haemophilus*, *Trypanosoma* or *Staphylococcus*) although not every species from these genera are pathogenic, but opportunistic or commensal organisms".

Line 296: As the methods section comes later, SqueezeMeta software needs citation and (possibly) a short intro.  
 AU: Changes applied, a new section has been added from line 382.

Line 316: sentence structure needs revisiting.  
 AU: Changes applied (lines 402-403): "Former studies also revealed a link between ruminal microbiota and methane production. Difford et al. showed different clusters of high and low methane emitters within prokaryotic rumen subcompositions".

Line 369-371 + 396: Good acknowledgement of limitations :)  
 AU: Thanks again!

Line 378: sentence structure needs revisiting.  
 AU: Sentence has been revisited (lines 295-296): "Lactate and succinate-producers have been reported to be more abundant in low-emitters as well [...]".

Line 404: VFA acronym has been introduced once 200 lines earlier, could be just spelled out.  
 AU: Acronym has been removed, as VFA are only mentioned three times.

Line 426-431: Interesting hypotheses!  
 AU: Thanks again!

Line 484: I am not sure if the data from nanopore sequencing suffers much from the consequences of batch effects, but in other metagenomic sequencing techniques batch effects are unfortunately often cause of trouble. Here batches were used of 12 samples at a time per run. Was the batch effect controlled/tested for? Even though probably the samples were randomised (were they?), a batch effect could still be present. This is worth checking. A batch correction might even improve the signal!  
 AU: We already controlled batch effect in other experiments using ONT sequencing using this and other datasets. No significant batch effect was detected, nor PCA showed sample discrimination by batches. This effect might be important if sequencing runs experience problems, but our runs have performed appropriately, keeping ONT performance and quality standards, so we did not include batch in our final models.

Line 500: what package was used to assess sparsity?  
 AU: The details on the packages and methods used for prevalence filtering, i.e., reducing matrix sparsity, can be found in Supplementary Data 2. We did not use any package for sparsity estimation, we counted the density of zeros in the matrix. We also visualized it using `zCompositions::zerocount` function, but this figures are not included in the paper.

Supplementary Table 1:  $p > 0.05$  hits should be included.  
 AU: We think that this request is not possible to manage, as including  $p > 0.05$  hits means to include the entire genera dataset (1,240 genera) for every contrast done (HIGH vs LOW, HIGH vs L-MID, HIGH vs H-MID, L-MID vs H-MID, L-MID vs LOW and H-MID vs LOW). That would become a table of 7,440 genera each repeated 6 times, making it difficult to appreciate the genera significantly DA.

Reviewer #2:  
 My main point of concern is the suitability of the SqueezeMeta pipeline, and the choice of databases (nr and KEGG) for rumen data.  
 For example, many groups have now published data showing rumen metagenome genes are very dissimilar to those found in public databases e.g. RefSeq.  
 The most up-to-date rumen microbiome datasets are:  
 -the Hungate collection <https://www.nature.com/articles/nbt.4110>  
 -Anaerobic fungi from JGI  
<https://mycocosm.jgi.doe.gov/neocallimastigomycetes/neocallimastigomycetes.info.html>  
 I  
 -MAG collections (many summarised here:  
<https://www.biorxiv.org/content/10.1101/2021.04.02.438222v1.full.pdf>)  
 -more MAGs and a rumen gene catalogue here:  
<https://microbiomejournal.biomedcentral.com/articles/10.1186/s40168-021-01078-x>

As this analysis is the fundamental basis of most of the rest of the manuscript, I need to be reassured it is producing accurate results, and without including the latest rumen genomes and gene catalogues, I am unsure that it is.  
 AU: SqueezeMeta pipeline is described elsewhere: e.g.  
<https://www.frontiersin.org/articles/10.3389/fmicb.2018.03349/full>,  
<https://bmcbioinformatics.biomedcentral.com/articles/10.1186/s12859-020-03703-2>.  
 Detailed descriptions can be found in the manual  
 ([https://github.com/jtamames/SqueezeMeta/blob/master/SqueezeMeta\\_manual\\_v1.4.0](https://github.com/jtamames/SqueezeMeta/blob/master/SqueezeMeta_manual_v1.4.0)).

pdf). A non-comprehensive list of previous manuscripts using SqueezeMeta can be found at [https://github.com/jtamames/SqueezeMeta/wiki/Some-papers-using-SqueezeMeta-\(non-comprehensive-list\)](https://github.com/jtamames/SqueezeMeta/wiki/Some-papers-using-SqueezeMeta-(non-comprehensive-list)). This software has been tested previously with satisfactory results.

The reference database used is the non-redundant NCBI database, which is the most comprehensive database up to date. Certainly, there may be reads that could align to the MAGs in those data sets, however they can still align at some taxonomical level, and be classified for instances as Unknown Firmicutes. We believe that classifying those reads to a MAG instead to an unknown genus from a certain class does not invalidate our results and there is little added value to the manuscript. We believe that detecting our own MAGs and compare them to these MAGs data bases would be more interesting, and can be tackle in future studies. The resulting microbial composition is similar to previous published results, as we stated from lines 389 to 395.

Nonetheless, we have included the Hungate collection in our database and test the analyses in a couple of samples. The results showed that less than 7% of the reads mapped against KEGGs from such a collection instead to the nrNCBI. Hence, we believe this should not invalidate the results obtained with the reference database used. Indeed, we can benefit from assembling our own MAGs, and combine them with other specific databases as the reviewer suggested. We are working on this objective, but elaborating a more comprehensive database is a different scope from the current study, and we hope that the reviewer understands that it should not preclude the validity of the current study, as we have demonstrated that the reference database used is highly accurate.

We hope that this convinces the reviewer, otherwise the referee needs to specify why he thinks that the bioinformatics analysis is not producing satisfactory results.

Reviewer #3:

This study has generated the largest ONT ruminal metagenomic dataset currently available, and found that ciliates and fungi are closely associated with methane emission. The findings is novel and have wide interest, but the manuscript need revision to be a good manuscript.

1. In all the Figures, the text are not clear. For me, I can't distinguish most of the characters, words, so it must be resolved.

AU: Thank you for your comments. We have considered the carefully. They were really useful and helped improving the manuscript in a nice manner. We would like to point out that the journal's built-in pdf shows the figures in lower quality than the expected, but downloading them is possible to visualize them with high quality. We believe that the format of the figures will be adapted during the editing process keeping the high quality of the figures provided.

2. In the Abstract Part:

"Background: This study analysed whole rumen metagenome using long reads and considering its compositional nature in order to disentangle the role of rumen microbes in methane emissions." Is this really background? I can't see any background and logic.

AU: This is a good point. Thank you. Changes in 'background' were implemented accordingly.

Methods: Line 33-38, can be removed from Abstract. Abstract needs concise, methods is not necessary here.

AU: The methods section from the abstract has been removed, as suggested.

3. In the Results Part:

"3.1 Cohort description: Our cohort included 437 Holstein lactating cows sampled at 14 different herds from northern Spain (Cantabria, Euskadi, Navarra and Girona regions)." This paragraph is very short and only have one sentence. I suggest to put it into methods part, and remove it from the results part. It can be merged with Methods 6.1 "Animal housing and feeding".

AU: Changes made accordingly (lines 434-435).

"3.7 Interaction networks" and "3.8 Taxonomy of genes" do not like sub-title names, they should be revised, to focus on the novel discoveries, which be more meaningful for the readers.

AU: The sub-titles were changed to "Co-abundance of genera and KEGGs" and "Distribution of genes among clades".

4. The Discussion Part:

The biggest problem is that it is too long. I suggest either make them concise, or move some into the results part. Those discussion contents that are closely with the results

|                                                                                                                                                                                                                                                                                                                                                                                                                                                                                                             |                                                                                                                                                                                                                                                                                                                                                                                                                                                                                                                                                                                                                                                                                                                                                                                                                                                                                                                                                                                                                                                                     |
|-------------------------------------------------------------------------------------------------------------------------------------------------------------------------------------------------------------------------------------------------------------------------------------------------------------------------------------------------------------------------------------------------------------------------------------------------------------------------------------------------------------|---------------------------------------------------------------------------------------------------------------------------------------------------------------------------------------------------------------------------------------------------------------------------------------------------------------------------------------------------------------------------------------------------------------------------------------------------------------------------------------------------------------------------------------------------------------------------------------------------------------------------------------------------------------------------------------------------------------------------------------------------------------------------------------------------------------------------------------------------------------------------------------------------------------------------------------------------------------------------------------------------------------------------------------------------------------------|
|                                                                                                                                                                                                                                                                                                                                                                                                                                                                                                             | <p>can be merged into the results part, and further discussions can be kept in the Discussion part.</p> <p>AU: We revised the discussion and made some changes, mostly re-organizing parts that were difficult to follow and shortening some paragraphs. We hope that the discussion is more readable now.</p> <p>5. In the Methods Part:<br/> "6.6 Bioinformatics" this sub-title is not meaningful, better change it to "Reads filtering, taxonomic and functional assignment" or others.</p> <p>AU: Change applied. New subtitle: "6.5 Read processing, mapping and filtering".</p> <p>6. The last suggestion: try to assemble the ONT long reads, generate gene set, and chromosome results by binning or other technologies. Maybe this will get a lot more useful sequence data.</p> <p>AU: This is a good suggestion for future works, we are currently working in this approach. We think that this is not critical under the current approach of detecting association between ruminal methane production and known microbial gene functions and taxa.</p> |
| <b>Additional Information:</b>                                                                                                                                                                                                                                                                                                                                                                                                                                                                              |                                                                                                                                                                                                                                                                                                                                                                                                                                                                                                                                                                                                                                                                                                                                                                                                                                                                                                                                                                                                                                                                     |
| <b>Question</b>                                                                                                                                                                                                                                                                                                                                                                                                                                                                                             | <b>Response</b>                                                                                                                                                                                                                                                                                                                                                                                                                                                                                                                                                                                                                                                                                                                                                                                                                                                                                                                                                                                                                                                     |
| Are you submitting this manuscript to a special series or article collection?                                                                                                                                                                                                                                                                                                                                                                                                                               | No                                                                                                                                                                                                                                                                                                                                                                                                                                                                                                                                                                                                                                                                                                                                                                                                                                                                                                                                                                                                                                                                  |
| <b>Experimental design and statistics</b>                                                                                                                                                                                                                                                                                                                                                                                                                                                                   | Yes                                                                                                                                                                                                                                                                                                                                                                                                                                                                                                                                                                                                                                                                                                                                                                                                                                                                                                                                                                                                                                                                 |
| <p>Full details of the experimental design and statistical methods used should be given in the Methods section, as detailed in our <a href="#">Minimum Standards Reporting Checklist</a>. Information essential to interpreting the data presented should be made available in the figure legends.</p> <p>Have you included all the information requested in your manuscript?</p>                                                                                                                           |                                                                                                                                                                                                                                                                                                                                                                                                                                                                                                                                                                                                                                                                                                                                                                                                                                                                                                                                                                                                                                                                     |
| <b>Resources</b>                                                                                                                                                                                                                                                                                                                                                                                                                                                                                            | Yes                                                                                                                                                                                                                                                                                                                                                                                                                                                                                                                                                                                                                                                                                                                                                                                                                                                                                                                                                                                                                                                                 |
| <p>A description of all resources used, including antibodies, cell lines, animals and software tools, with enough information to allow them to be uniquely identified, should be included in the Methods section. Authors are strongly encouraged to cite <a href="#">Research Resource Identifiers</a> (RRIDs) for antibodies, model organisms and tools, where possible.</p> <p>Have you included the information requested as detailed in our <a href="#">Minimum Standards Reporting Checklist</a>?</p> |                                                                                                                                                                                                                                                                                                                                                                                                                                                                                                                                                                                                                                                                                                                                                                                                                                                                                                                                                                                                                                                                     |

|                                                                                                                                                                                                                                                                                                                                                                                                                                                                                                                                                         |            |
|---------------------------------------------------------------------------------------------------------------------------------------------------------------------------------------------------------------------------------------------------------------------------------------------------------------------------------------------------------------------------------------------------------------------------------------------------------------------------------------------------------------------------------------------------------|------------|
| <p><b>Availability of data and materials</b></p> <p>All datasets and code on which the conclusions of the paper rely must be either included in your submission or deposited in <a href="#">publicly available repositories</a> (where available and ethically appropriate), referencing such data using a unique identifier in the references and in the “Availability of Data and Materials” section of your manuscript.</p> <p>Have you have met the above requirement as detailed in our <a href="#">Minimum Standards Reporting Checklist</a>?</p> | <p>Yes</p> |
|---------------------------------------------------------------------------------------------------------------------------------------------------------------------------------------------------------------------------------------------------------------------------------------------------------------------------------------------------------------------------------------------------------------------------------------------------------------------------------------------------------------------------------------------------------|------------|



## **Fungal and ciliate protozoa are the main rumen microbes associated with methane emissions in dairy cattle.**

1 **Adrián López-García<sup>1</sup>, Alejandro Saborío-Montero<sup>1,2</sup>, Mónica Gutiérrez-Rivas<sup>1</sup>,**  
2 **Raquel Atxaerandio<sup>3</sup>, Idoia Goiri<sup>3</sup>, Aser García-Rodríguez<sup>3</sup>, Jose A. Jiménez-**  
3 **Montero<sup>4</sup>, Carmen González<sup>1</sup>, Javier Tamames<sup>5</sup>, Fernando Puente-Sánchez<sup>5</sup>,**  
4 **Magdalena Serrano<sup>1</sup>, Rafael Carrasco<sup>6</sup>, Cristina Óvilo<sup>1</sup>, Oscar González-Recio<sup>1,7\*</sup>**

5 <sup>1</sup>Departamento de Mejora Genética Animal. Instituto Nacional de Investigación y  
6 Tecnología Agraria y Alimentaria, Crta. de la Coruña km 7.5, 28040 Madrid, Spain.

7 <sup>2</sup>Escuela de Zootecnia y Centro de Investigación en Nutrición Animal, Universidad de  
8 Costa Rica, 11501, San José, Costa Rica

9 <sup>3</sup>NEIKER – Instituto Vasco de Investigación y Desarrollo Agrario. Basque Research and  
10 Technology Alliance (BRTA). Campus Agroalimentario de Arkaute s/n, 01192 Arkaute,  
11 Spain.

12 <sup>4</sup>Confederación de Asociaciones de Frisona Española (CONAFE). Ctra. de Andalucía km  
13 23600 Valdemoro, 28340 Madrid, Spain.

14 <sup>5</sup>Departamento de Biología de Sistemas, Centro Nacional de Biotecnología, CSIC,  
15 Madrid, Spain

16 <sup>6</sup>Departamento de Periodismo y Nuevos Medios. Universidad Complutense de Madrid,  
17 Ciudad Universitaria s/n, 28040 Madrid, Spain.

18 <sup>7</sup>Departamento de Producción Agraria. Escuela Técnica Superior de Ingeniería  
19 Agronómica, Alimentaria y de Biosistemas. Universidad Politécnica de Madrid, Ciudad  
20 Universitaria s/n, 28040 Madrid, Spain.

21

22 **\* Correspondence:**

23 Óscar González-Recio

24 gonzalez.oscar@inia.es

25 **Keywords: dairy cattle, microbiome, rumen, methane, Nanopore, long reads.**

26



27 **1 Abstract**

28 Background: Mitigating the effects of global warming has become the main challenge for  
29 humanity in the last decades. Livestock farming contributes to greenhouse gas emissions,  
30 with an important output of methane from enteric fermentation processes, mostly in  
31 ruminants. As ruminal microbiota is directly involved in digestive fermentation processes  
32 and methane biosynthesis, understanding the ecological relationships between rumen  
33 microorganisms and their active metabolic pathways is essential for reducing emissions.  
34 This study analyzed whole rumen metagenome using long reads and considering its  
35 compositional nature in order to disentangle the role of rumen microbes in methane  
36 emissions.

37 Results: The beta-diversity analyses suggested an association between methane  
38 production and overall microbiota composition ( $0.01 < R^2 < 0.02$ ). Differential abundance  
39 analysis identified 36 genera and 279 KEGGs as significantly associated to methane  
40 production ( $P_{adj} < 0.05$ ). Those genera associated to high methane production were  
41 Eukaryota from Alveolata and Fungi clades, while Bacteria were associated to low  
42 methane emissions. The genus-level association network showed two clusters grouping  
43 Eukaryota and Bacteria, respectively. Regarding microbial gene functions, 41 KEGGs  
44 resulted to be differentially abundant between low and high emission animals, and were  
45 mainly involved in metabolic pathways. No KEGGs included in the methane metabolism  
46 pathway (ko00680) were detected as associated to high methane emissions. The KEGG  
47 network showed three clusters grouping KEGGs associated to high emissions, low  
48 emissions and not differentially abundant in either of them. A deeper analysis of the  
49 differentially abundant KEGGs revealed that genes related with anaerobic respiration  
50 through nitrate degradation were more abundant in low emissions animals.

51 Conclusions: Methane emissions are largely associated to the relative abundance of ciliate  
52 and fungi. The role of nitrate electron acceptors can be particularly important as this  
53 respiration mechanism directly competes with methanogenesis. Therefore, whole  
54 metagenome sequencing is necessary to jointly consider relative abundance of Bacteria,  
55 Archaea and Eukaryota in the statistical analyses. Nutritional and genetic strategies to  
56 reduce CH<sub>4</sub> emissions should focus on reducing the relative abundance of Alveolata and  
57 Fungi in the rumen. This experiment has generated the largest ONT ruminal metagenomic  
58 dataset currently available.

## 59 2 Introduction

60 Next generation sequencing technologies have provided special relevance to microbial  
61 communities from different niches, as they allow identifying their taxonomic and  
62 functional profile. It has made possible to unravel the relationships between host and  
63 microbiota, as well as the complex interactions between microbes, with a special  
64 contribution to the role of digestive microbiome on complex traits both in humans [1]  
65 (e.g. type II diabetes, cancer, mental diseases) and in domestic animals [2,3] (e.g. feed  
66 efficiency, methane emissions, animal health).

67 Microbial communities are of special relevance in livestock. In ruminants, one of the  
68 main microbial communities lays in the rumen, due to its high diversity and large  
69 microbial mass [4] and its main role in feed fermentation to provide substrate to the  
70 animal, which is then transformed into product. Additionally, enteric methane is produced  
71 in the rumen by methanogenic microorganisms during feed fermentation [5] and is the  
72 main contributor of greenhouse gases (GHG) from livestock, with 2.8 to 3.5 gigatonnes  
73 of CO<sub>2</sub>-equivalent (CO<sub>2</sub>e) per year [6,7]. The ongoing climate emergency urgently calls  
74 for efficient strategies to mitigate the carbon footprint from all sectors, including

75 agriculture and livestock farming. Former studies have proven that complex traits in  
76 ruminants are usually influenced by global changes in **ruminal** microbial communities,  
77 more than by fluctuations in the abundance of specific microorganisms [8,9]. These  
78 global changes are usually due to the intricate interactions between different species in  
79 these communities (*i.e.*, predation, competition of ecological niche or co-dependency).  
80 Consequently, a better understanding of the interactions between microbial genes during  
81 methanogenesis is needed to propose strategies for reducing methane emissions.  
82 Promising strategies have been proposed to modulate the metagenome, nutrition and  
83 genetics [10].

84 Classical statistical approaches do not allow to accurately assess the results of  
85 microbiome studies. The high sparsity of these data and their compositional nature  
86 generate multiple problems in statistical analysis, including subcompositional  
87 incoherence, increase of false positive rates in differential abundance analyses and  
88 detection of spurious correlations [11].

89 As a consequence, new approaches considering both compositionality and multiple  
90 correlations are needed. It is also important to point out the advantages of whole  
91 metagenome sequencing over metataxonomic studies, because the latter cannot be used  
92 to determine functionality and because they pose some difficulties at simultaneously  
93 analyzing different superkingdoms [12], which is necessary to account for the total  
94 variability of microbiomes and the interactions among their components. Different  
95 amplicons must be used to correctly classify *Bacteria*, *Archaea*, *Protozoa* and *Fungi*,  
96 increasing the cost of the studies and involving additional bias due to PCR [13]. They  
97 pose the additional difficulty of a proper comparison between communities sequenced in  
98 different reactions with different primers. Nanopore sequencing offers a cost-efficient  
99 sequencing strategy for metagenomics studies providing both taxonomical and functional

100 information simultaneously and for microbes from all superkingdoms. This technology  
101 has been improved in recent years, allowing to perform taxonomic and functional  
102 assignments with an accuracy comparable to Illumina [14].

103 The objective of this study was to characterize the taxonomical and functional  
104 composition of rumen microbiota using long sequence reads obtained with Nanopore  
105 technology, and their relationship with enteric methane emission.

## 106 **3 Results**

### 107 **3.1 Taxonomy of microbial composition**

108 After initial **selection of core taxonomy**, 6,394,671 reads with N50 = **4,022** bp were  
109 classified in 3,921 taxonomical features up to genus level. A filtering strategy was  
110 implemented to **exclude** low abundance microbes while keeping the core microbiome  
111 relevant for methane emissions. This **process removed** 48,517 reads (<1%) which reduced  
112 the sparsity of the metagenome from 87% to 68%, although a large number of singleton  
113 and doubleton features remained (**Supplementary Figure 1**). The final core  
114 subcomposition included a total of 6,318,344 reads, in 437 samples, classified in 1,240  
115 taxonomical features: 967 known genera (722 bacteria, 13 archaea and 232 eukaryotes),  
116 and 273 that only reached family rank (*i.e.*, *Unclassified* denomination). Overall, 503  
117 families, 277 orders, 158 classes and 86 different phyla (37 bacterial phyla, 3 archaeal  
118 phyla and 46 eukaryotic clades) were classified. **Relative abundance (RA) distribution by  
119 superkingdoms and phyla is summarized below.**

120 Predominant microorganisms in this core rumen subcomposition were bacteria (91.6% ±  
121 6.93 of total average RA) from *Bacteroidetes*, *Firmicutes* and *Fibrobacteres* (**Figure 1**),  
122 representing an average RA of 63%, 16% and 5%, respectively. The *Bacteroidetes*

123 fraction was majorly composed by *Prevotella*, and was the main representative genus in  
124 the total community (19.4% average RA), along with other *Prevotellaceae* members. The  
125 *Firmicutes* group included a large number of genera. The order of *Clostridiales*  
126 dominated in terms of RA, with *Lachnospiraceae* and *Ruminococcaceae* families being  
127 the most representative ones. The remaining phyla (34) from the *Bacteria* superkingdom  
128 represented 7.6% averaged RA of the core metagenome. Eukaryotes represented a total  
129 average RA of 8.2% ( $\pm 6.95$ ) of the core subcomposition. Predominant eukaryotic clades  
130 were those included in the *SAR* supergroup (*Stramenopiles-Alveolata-Rhizaria*) [15],  
131 accounting for 6% of total average RA, followed by *Fungi* (1.3% of total average RA).  
132 *Alveolata* clade was the most abundant among the eukaryotes, with a high representation  
133 of unclassified *Ophryoscolecidae*, *Stentor* and *Paramecium*. *Archaea* representation in  
134 the core subcomposition ( $0.24\% \pm 0.25$  of total average RA) consisted mostly of  
135 *Methanomicrobia*, *Methanobacteria* and *Thermoplasmata* members. Yet, a large number  
136 of reads could not be assigned to a known genus. The relative abundance per animal of  
137 the most relevant taxonomic groups is depicted in **Supplementary Figure 2**.

### 138 **3.2 Functionality of microbial composition**

139 A total of 30,326,550 reads **with N50 = 5,720 bp** were assigned to KEGGs. After  
140 prevalence filtering, a total of 84,219 reads (0.28%) were removed and the sparsity was  
141 reduced from 72% to 39% (**Supplementary Figure 1**). The final KEGG table was  
142 composed by 30,145,459 reads from 437 samples, classified in 6,644 KEGGs. These  
143 KEGG pathways and BRITE hierarchies [16–18] were represented in a Treemap  
144 according to their average RA (**Figure 2**). **A 26%** of the rumen metagenome functions  
145 were in pathways that represent the metabolism of carbohydrate, amino acid and other  
146 biological compounds, as well as of energy metabolism. In addition, **11% of** functions  
147 **were** involved in cellular generic processes (cell growth **(3%)**, transport **and catabolism**

148 (4%), or genetic and environmental information processing (23%). KEGG BRITE  
149 classification showed a high presence of proteins involved in cellular processes (36%)  
150 and metabolism (26%).

### 151 3.3 Beta-diversity and PERMANOVA analysis

152 Beta-diversity was represented in Principal Component Analysis (PCA) between samples  
153 at five different taxonomic levels (phylum, class, order, family and genus), as well as with  
154 KEGG, using centered log-ratio (CLR) transformed datasets. Then a permutational  
155 analysis of variance (PERMANOVA) was implemented [11], sequentially adding the  
156 effect of farm-batch (B), stage of lactation (SL), number of lactation (NL) and level of  
157 methane emissions (CH<sub>4</sub>) discretized in four groups (LOW, L-MID, H-MID and HIGH).  
158 The visualization did not show a clear visual clustering of samples by methane emission  
159 levels (Figure 3). However, a generalized additive model (GAM) smooth fitting allowed  
160 visualizing non-linear distribution patterns of the microbial samples according to CH<sub>4</sub>  
161 emissions inside the ordination at all taxonomic levels. The non-linear pattern was more  
162 evident at the phylum, class and genus levels, although the proportion of methane  
163 variability explained was low ( $\approx 4.8\%$  according to GAM model fitting). No relevant  
164 differences were visually appreciated using the KEGG information. Nonetheless, some  
165 differences in the overall rumen microbiome composition between animals with different  
166 methane emissions were evidenced by the PERMANOVA analysis, both for taxonomy  
167 and functionality (Table 1). The results showed significant differences for the centroid  
168 distance between methane emission groups at every taxonomic level and also for KEGGs  
169 ( $P < 0.01$ ), but they explained a low percentage of total variance ( $0.01 < R^2 < 0.02$ ).

### 170 3.4 Rumen microbes associated to CH<sub>4</sub> emissions

171 The effect of taxonomical features on methane emission levels was evaluated through  
172 differential abundance analysis. Thirty-three genera were found as differentially abundant  
173 (DA) ( $P_{adj} < 0.05$ ) between LOW and HIGH emitters (**Figure 4A**), while 15 genera  
174 showed DA between LOW and H-MID emitters and one genus between LOW and L-  
175 MID emitters (**Supplementary Data 1**). Note that 13 out of the 15 genera showing DA  
176 ( $P_{adj} < 0.05$ ) between LOW and H-MID groups were also significant in the LOW vs HIGH  
177 contrast, but not in LOW vs L-MID contrast, indicating gradual abundance change from  
178 low to high emitters. Accounting for all contrasts and duplicated genera, 36 DA genera  
179 resulted significant. We classified these genera according to their respective  
180 overabundance (OA) in the LOW or HIGH emissions groups. Thus, 10 of them were  
181 more abundant in the LOW group (LOW-OA) and 1 in the L-MID group. The remaining  
182 25 genera were OA in the HIGH groups (HIGH-OA): HIGH (12), HIGH and H-MID (11)  
183 or H-MID (2). HIGH-OA genera represented an overall RA of 4.15%, whereas LOW-OA  
184 genera accounted for 0.25% of total RA. The two genera over-abundant in H-MID were  
185 *Dictyostelium* and *Unclassified Eimeriidae*, and the one associated to L-MID was  
186 classified as *Candidatus Izimaplasma (Tenericutes)*. The  $\log_2FC$  values ranged between  
187 0.7 and -0.7 in genera showing DA for methane emission levels, highlighting that the  
188 differences between groups were moderate.

189 Overall, DA results indicate that taxa associated to higher methane levels belong to the  
190 *Eukaryota* superkingdom, while those associated to lower emissions were bacteria. We  
191 found multiple *Ciliophora* genera associated to the HIGH group (mostly *Parameciidae*,  
192 *Stentoridae* and *Pseudocohnilembidae* members) but also *Amoebozoa* and some *Fungi* or  
193 pseudo-fungi. Other bacterial genera associated to lower methane production were  
194 *Hespellia*, from *Clostridiales*, and *Sutterella*, an asaccharolytic genus from  
195 *Betaproteobacteria*.



### 196 **3.5 Microbial gene function associated to CH<sub>4</sub> emissions**

197 Differential abundance analysis was also performed for KEGG features on methane  
198 emission levels. A total of 192 KEGGs were DA between the LOW and HIGH emissions  
199 groups (**Figure 4B**). Differences were also found between the LOW and H-MID groups  
200 (**Supplementary Data 1**). As in the taxonomy dataset, some of the KEGGs presented  
201 significant DA in both LOW vs HIGH and LOW vs H-MID contrasts. Accounting for  
202 these duplicates and all the contrasts, 182 were over-abundant in the high emissions  
203 groups (HIGH-OA), whereas 97 KEGGs were over-abundant in low emissions groups  
204 (LOW-OA). The overall RA for HIGH-OA KEGGs was 2.31% and 0.64% for LOW-OA  
205 KEGGs. Of these, 13 HIGH-OA KEGGs and 28 LOW-OA KEGGs were assigned to  
206 metabolic pathways. No KEGGs from the ko00680 pathway were found as HIGH-OA.  
207 KEGGs related to inositol-phosphate metabolism (K00889, K01110, K18082 and  
208 K20279), starch and sucrose metabolism (K01203) or several lipid metabolism pathways  
209 were present in the HIGH-OA group. According to LOW-OA KEGGs, some of them  
210 were involved in volatile fatty acid metabolism (e.g., K00209 enoyl-[acyl-carrier protein]  
211 reductase [EC:1.3.1.9], K01902 succinyl-CoA synthetase alpha subunit [EC:6.2.1.5] and  
212 K01682 aconitate hydratase 2 [EC:4.2.1.3]) and the K09251 putrescine aminotransferase  
213 [EC:2.6.1.82] related to putrescine and cadaverine degradation to 4-amino-butanoate  
214 (GABA) or 2-oxoglutarate. Also, several KEGGs in the LOW-OA group were related to  
215 N metabolism (K00370 and K00371 nitrate reductase subunits [EC:1.7.5.1]), oxidative  
216 phosphorylation (K03885 NADH dehydrogenase [EC:1.6.99.3]) and to carbohydrate,  
217 lipid or vitamin metabolism pathways. The ko00680 KEGG K13788 was also over-  
218 abundant in the LOW emissions group.

### 219 **3.6 Co-abundance of genera and KEGGs**

220 Interaction networks were built using the previous results in order to visualize the  
221 association between taxa and genes using pairwise correlations between features.  
222 Pairwise proportionality correlation coefficients ( $\rho_p$ ) were calculated on the CLR-  
223 transformed datasets for phylum, genus and KEGG features to mitigate the effect of  
224 spurious correlations that can potentially surge in compositional data [19].

225 The most relevant pairwise proportionalities between genera and between KEGGs were  
226 visualized as interaction networks, classifying features as associated to high methane  
227 emissions (HIGH), low methane emissions (LOW) or not associated to methane  
228 emissions (N/A), according to the results from the differential abundance analyses. The  
229 interaction networks for genera and KEGGs are shown in **Figure 5** and **Figure 6**,  
230 respectively.

231 Eukaryotes clustered together in the network with large representation of the *SAR*  
232 supergroup, and showed negative proportionality to bacteria. The genera that were  
233 associated to higher methane emissions belonged to the *Eukaryota* superkingdom  
234 (*Ciliophora* and *Fungi*), whereas *Bacteria* were associated to lower CH<sub>4</sub> production. The  
235 strongest inverse proportionalities between both subpopulations connected several  
236 eukaryotes with *Unclassified Veillonellaceae* and *Oribacterium* ( $-0.64 < \rho_p < -0.53$ ),  
237 *i.e.*, microbiomes with lower abundance of *Oribacterium* or *Veillonellaceae* tend to  
238 present larger abundances of protozoa and fungi, and were therefore associated to larger  
239 emissions. Unclassified microbes from *Neocallimastigaceae*, *Oxytrichidae* and  
240 *Vibrionaceae* families showed the highest centrality and a large connectivity degree.

241 The functional network showed three main clusters that grouped KEGGs associated to  
242 HIGH methane level (cluster H), KEGGs not related to methane emissions (cluster N),  
243 and a small one including KEGGs associated to lower emissions (cluster L). Connections

244 between clusters were not symmetric: H cluster was connected to N cluster by inverse  
245 proportionalities between some of their components, but the L cluster appeared connected  
246 only to N cluster by direct proportionalities through non-clustered KEGGs. Also, most of  
247 the ko00680 KEGGs (*i.e.*, directly involved in methanogenesis or participating in  
248 pathways leading to methanogenesis precursors) did not appear as differentially abundant  
249 between high-emission and low-emission cows.

### 250 **3.7 Distribution of genes among clades**

251 A traceback of genes' taxonomy was carried out, separately for ko00680 KEGGs and for  
252 DA KEGGs. Thirty out of the 85 ko00680 KEGGs were predominant in Archaea groups,  
253 one predominated in *Eukaryota* (K05979) and the rest were predominant in *Bacteria*  
254 (**Figure 7**). Although the RA distribution of these KEGGs was normally between 60%  
255 and 100% in the predominant superkingdom, 4 KEGGs were more evenly distributed  
256 between clades: K01007 and K00863 had a RA < 60% in *Bacteria* and showed RA >  
257 30% in *Eukaryota*; K05979 was the KEGG predominating in *Eukaryota*, but with a RA  
258 near to 60% (38% in *Bacteria* and 12% in *Archaea*); and K14080 had a RA of 57% in  
259 *Archaea* and 43% in *Bacteria*. Regarding the DA KEGGs, those from the LOW-OA  
260 group showed larger abundance in *Bacteria*, mostly in genera from *Proteobacteria*,  
261 *Bacteroidetes* and *Firmicutes* phyla. Different groups of bacteria also carried KEGGs  
262 from the HIGH-OA group although these KEGGs were more abundant in eukaryotes.  
263 The HIGH-OA KEGGs were mainly mapped to unclassified eukaryotes, but those which  
264 could be classified belonged majorly to *Fungi* and *SAR* supergroup (**Figure 8**).

## 265 **4 Discussion**

266 In this study we assessed the composition of the ruminal microbiota using long reads from  
267 Nanopore sequencing technology. We observed predominance of *Bacteroidetes*,

268 *Firmicutes* and *Fibrobacteres*, as reported in previous studies [8,20]. *Bacteroidetes* and  
269 *Firmicutes* are common bacteria in all kind of ecosystems, including gut microbiota of  
270 multiple animals. The fraction of *Bacteroidetes* was mainly composed by *Prevotella*, a  
271 group of anaerobic gram-negative bacteria involved in saccharolytic processes [21]. Their  
272 large abundance in the digestive microbiota has been previously reported in ruminant  
273 [22–26] and monogastric species [27,28]. *Firmicutes* were less abundant, with a more  
274 diverse distribution of genera. *Fibrobacteres*, a small group of cellulose-degrading  
275 bacteria usually present in ruminant digestive system [29], was mainly represented by the  
276 *Fibrobacter* genus. Eukaryotes also represented a relevant amount of the rumen core  
277 metagenome. This group has been reported to contribute up to 50% of total ruminal  
278 biomass [30]. The SAR supergroup and *Fungi* were the most relevant ones, which are  
279 found in a wide variety of ruminants and pseudoruminants [15,31]. Other eukaryotes  
280 included *Stentor* and *Paramecium*, the former are aquatic free-living heterotrichs  
281 which can be particle filtrators or predators of other protozoa and live symbiotically with  
282 some algae species [32,33], whereas the latter are well-known ciliates which predate  
283 bacteria and other microorganisms, including protozoa [34]. Archaeal fraction was mostly  
284 composed by strict methanogenic organisms from *Methanomicrobia* and  
285 *Methanobacteria* clades [35], but also included *Thermoplasmata*, which are  
286 methylotrophic-methanogenic acidophilic organisms [36].

287 The DA analysis showed that ciliates, fungi and pseudo-fungi were more abundant in  
288 cows with higher levels of methane emissions. Microbes associated to lower methane  
289 emissions were saccharolytic members of class *Gammaproteobacteria*  
290 (*Anaerobiospirillum* [37], *Vibrio* [38] or *Pseudoalteromonas* [39]), as well as  
291 *Negativicutes* genera from *Veillonellaceae* (*Dialister*, *Megasphaera*) and  
292 *Selenomonadaceae* (*Mitsuokella*). *Dialister* produce succinate decarboxylation, and

293 *Megasphaera* ferment carbohydrate and lactate [40], while *Mitsuokella* are saccharolytic  
294 bacteria [41]. The low-emissions ruminotype had larger abundance of *Proteobacteria* and  
295 *Firmicutes* genera. Other authors also reported higher abundances of these bacterial phyla  
296 in low methane emissions animals [8]. Lactate and succinate-producers have been  
297 reported to be more abundant in low-emitters as well [42], supporting the higher  
298 abundance of *Anaerobiospirillum* or *Megasphaera* in LOW animals.

299 Despite this association between methane and large taxonomic groups, it is of interest to  
300 find out which specific clades and microbial genes are participating directly or indirectly  
301 in methanogenesis. The genera co-abundance network showed a clear cluster of  
302 eukaryotes, with many of them being significantly more abundant in the high emissions  
303 group. Other authors have already established a positive correlation between fungi  
304 abundance and methane emissions [8], as well as a close interdependence of protists and  
305 fungi. Although correlation between methane emissions and protozoa abundances is still  
306 under discussion [43,44], current meta-analyses point to a linear relationship between  
307 protozoa abundance and methane emissions ( $r=0.96$ ) [45].

308 Interestingly, no taxonomic group of methanogenic archaea showed association with  
309 methane emissions. The relationship between Archaea and methane production in rumen  
310 is not consistent in the literature. Some authors reported either individual relationships  
311 between methane emissions and some archaeal species [46,47] or correlations between  
312 overall archaeal gene abundance and methane emissions level [43,48]. However, other  
313 studies showed no relationship between methanogenic *Archaea* and methane [47,49]. All  
314 studies to date showed a low relative abundance of archaea in the rumen, compared to  
315 eukaryotes and bacteria [50]. However, the association between the abundance of rumen  
316 eukaryotes and methane emissions has been demonstrated through defaunation  
317 experiments, both in vitro [51,52] and in vivo [44,53], with lower emissions in defaunated

318 animals [54]. This has been attributed to the tight link existing between methanogenic  
319 archaea abundance and some fungi and protozoa [50]. Specifically, ciliates and some  
320 *Chytridiomycota* (e.g. *Neocallimastix* sp.) are known to symbiotically engulf a variety of  
321 methanogenic archaea. They provide the archaea with substrate for methane production  
322 from H<sub>2</sub> produced in their hydrogenosomes, as well as protection against oxygen toxicity  
323 [30,55,56]. Thus, free-living methanogens might represent a low fraction of microbial  
324 population [45], and CH<sub>4</sub> biosynthesis might be more influenced by endosymbiotic  
325 methanogens [55]. Hence, a larger methanogenesis activity is expected to be correlated  
326 with a larger abundance of eukaryotes, especially ciliates, which are more abundant and  
327 better represented. Another partial explanation for the low abundance of free archaea, and  
328 thereby for the lack of association between Archaea and methane emissions in previous  
329 studies [10], is that lysis of archaea cell walls often requires specific protocols during  
330 DNA extraction, and they might be under-represented in metagenomics studies [57].

331 In terms of Gene Ontology, the KEGGs were associated to several metabolic functions  
332 and cellular processes (nutrient metabolism and biosynthesis, cellular transport, cell  
333 growth or genetic information processing). Pathways related to pathogenic activity were  
334 also found, in agreement with the RA of several genera that include known pathogenic  
335 species (e.g. *Vibrio*, *Haemophilus*, *Trypanosoma* or *Staphylococcus*) although not every  
336 species from these genera are pathogenic, but opportunistic or commensal organisms.  
337 Besides, pathogenic activity presence in our dataset might be biased due to a larger  
338 representation of human related diseases in the databases. The KEGGs were classified  
339 according to their presence or absence in ko00680 pathway (methane metabolism), as a  
340 way to evaluate their direct involvement in methanogenesis or an indirect involvement in  
341 pathways leading to biosynthesis of precursor compounds. Although we found several  
342 ko00680 KEGGs which are presumably involved in the biosynthesis of methanogenesis

343 precursors, most of them were not associated to methane emissions (*i.e.*, not differentially  
344 abundant between methane groups). **Most of these KEGGs were** mainly present in  
345 bacteria or eukaryotes and might be functioning in metabolic pathways not related **to**  
346 methanogenesis. For instance, some of the KEGGs inside the methane metabolism  
347 pathway can also be involved in glycine, serine and threonine metabolism (e.g. K00058,  
348 K00831, K01079 and K00600), pyruvate and propanoate metabolism (e.g. K00625 and  
349 K13788), glycolysis (e.g. K01689, K15633, K01624 and K02446) or anaerobic carbon  
350 fixation (e.g. K00198) [16–18]. Another group of ko00680 KEGGs is exclusive from  
351 *Archaea*, but the under-representation of this clade in our dataset might obscure statistical  
352 significance.

353 **Other detected** KEGGs could be indirectly related with methanogenesis through  
354 biosynthesis of precursor compounds. **For instances,** K00209 and K13788 are involved  
355 in butyrate and propanoate biosynthesis, being essentially carried by primary  
356 fermentative bacteria [58]. **Then the volatile fatty acids** can be used by secondary  
357 fermenters to produce methanogenesis precursors such as H<sub>2</sub>, CO<sub>2</sub>, acetate and formate  
358 [59,60]. In fact, K13788 is a phosphate acetyltransferase [EC:2.3.1.8] that can be involved  
359 in the biosynthesis of acetate from acetyl-CoA [61]. Also, K09251 is involved in  
360 biosynthesis of GABA and 2-oxoglutarate. GABA has been related with a **volatile fatty**  
361 **acid** concentration increment [62], while 2-oxoacid compounds can be used by *Archaea*  
362 to synthesize coenzyme M and coenzyme B, which are essential in methane production  
363 [63]. However, all these KEGGs were observed as over-abundant in LOW methane  
364 group, suggesting a strong presence of fermentative bacteria in these animals, not directly  
365 correlated with methane production.

366 Other KEGGs that were over-abundant in LOW emitters might offer an explanation to  
367 the lower presence of active methanogenesis processes through competence mechanisms



368 (e.g. LOW-OA KEGGs K01682, K01902 and K13788, are involved in citrate cycle and  
369 pyruvate metabolism, related to respiration). The K00370 and K00371 are nitrate  
370 oxidoreductase subunits playing a role in anaerobic respiration using nitrate as electron  
371 acceptor. This enzyme uses nitrate as electron acceptor, a process that has been reported  
372 as competitive inhibitor of methanogenesis [64,65]. Nitrate supplementation has proven  
373 to be an useful strategy to mitigate methane emissions [66]. Nitrite produced by the  
374 nitrate-reductases has a known antimicrobial effect and toxicity to animal cells [67–69],  
375 which might also reduce the proportion of free archaea in LOW animals, although toxicity  
376 to archaea must be further studied [70]. However, the role of ciliates and fungi must be  
377 clarified, as their abundance is also lower in LOW emitters. We hypothesize that the  
378 predatory nature of these eukaryotes might be a control mechanism for bacterial  
379 populations, and their lower relative abundance in LOW animals might allow overgrowth  
380 of related bacteria. Nevertheless, there is the possibility that a higher proportion of  
381 facultative anaerobes using nitrate as acceptor might affect ciliate populations by toxicity,  
382 thus reducing the presence of endosymbiotic methanogenic archaea.

383 The SqueezeMeta software [71] uses a last common ancestor (LCA) algorithm, which  
384 assigns to one read the lowest-level taxon common to all hits, using a stringent cutoff  
385 identity value for each taxonomic rank. On its part, functional assignments are done with  
386 fun3 algorithm, which by default assigns the hit with the highest average bitscore  
387 compared to the n first hits passing the e-value, identity and coverage filters. This LCA  
388 approach ensures that reads have a large probability of being correctly classified, at  
389 expense of a large number of reads remaining unclassified, which explains the larger  
390 number of reads assigned to a known KEGG than to taxa. Despite this strict requirement,  
391 this composition is consistent with other populations reported before [2,3,20]. Most  
392 studies to date report large abundance of *Bacteroidetes* and *Firmicutes*, with *Prevotella*

393 *spp.* as the most prevalent genus. Some minor discrepancies with other studies were  
394 observed in the RA of the core subcomposition. For example, Wallace *et al.* [20] showed  
395 a higher presence of *Proteobacteria* and *Euryarchaeota*, although using amplicons  
396 instead of whole metagenome sequencing.

397 Our statistical approach evidenced the difficulty of inferring a phenotypic association  
398 between microbiome composition and methane production, with an important role of  
399 environmental factors that mask the statistical signal. However, a meaningful relationship  
400 between the microbiome composition and methane emissions could be uncovered yet,  
401 emphasizing the role of the different phyla, with the *Eukaryota* superkingdom being of  
402 particular relevance. Former studies also revealed a link between ruminal microbiota and  
403 methane production. Difford *et al.* [3] showed different clusters of high and low methane  
404 emitters according to their bacterial and archaeal subcomposition. Danielsson *et al.* [46]  
405 also found clustering for low and high methane emitters within prokaryotic rumen  
406 subcompositions. Wallace *et al.* [20] found that a core set of rumen microbiome was  
407 capable of explaining up to 30% of methane emissions variability, mostly formed by  
408 prokaryotes. The aforementioned studies used different methodologies, like amplicon  
409 analysis and OTU clustering, contrasting with our full-metagenome genus-clustering  
410 protocol, which increases the information entropy. Stewart *et al.* [72] used Nanopore  
411 sequencing and found significant differences between low and high-methane emitter  
412 sheep, with clear clustering between groups, but using a lower number of microbial  
413 groups and animals in the same farm with similar management practices.

## 414 **5 Conclusions**

415 The full metagenome compositional analysis used in this study provided novel insights  
416 in the association between the microbiota and CH<sub>4</sub> emissions through differential

417 abundance analysis, pairwise correlation and interaction networks. Our approach  
418 evidenced a phenotypic association between microbiome composition and methane  
419 production, regardless of the challenges posed by the microbiome complexity and the  
420 compositional nature of the data. This association is mainly driven by the relative  
421 abundance of ciliates and fungi, which carry host specific genetic functions providing  
422 substrate to the methanogenic archaea. On the other side, we detected some bacterial  
423 groups that performed a more efficient feed digestion, leaving less hydrogen available to  
424 archaea and hence associated to lower methane emissions.

425 This study generated the largest ruminal metagenomic dataset sequenced using ONT and  
426 grants free access to a publicly-available data set. The complexity of the rumen  
427 microbiome and the compositional nature of their sequencing data require proper  
428 statistical methods to allow disentangling the role of microbes and their genes in host  
429 complex traits such as methane emissions. Future nutritional and genetic strategies to  
430 reduce CH<sub>4</sub> emissions should focus on reducing the relative abundance of *Alveolata* and  
431 *Fungi* in the rumen, without impairing other important metabolic processes for an  
432 efficient feed digestion in ruminants.

## 433 **6 Methods**

### 434 **6.1 Animal housing and feeding**

435 Our cohort included 437 Holstein lactating cows sampled at 14 different herds from  
436 northern Spain (Cantabria, Euskadi, Navarra and Girona regions). The animals received  
437 total mixed ration (TMR) diet differently formulated on each individual herd, although  
438 most of them were based on maize and grass silage plus concentrate. Cows were fed ad-  
439 libitum, with concentrate supplementation in the automatic milking station (AMS) during  
440 milking.

## 441 **6.2 Methane measuring**

442 Methane concentration was individually recorded through breath sampling during each  
443 cow visit to the AMS (3-7 times daily) in a period of 2-3 weeks. Eructation peaks were  
444 recorded using a non-dispersive infrared methane detector (Guardian NG infrared gas  
445 monitor, Edinburgh Sensors, Scotland, UK) as described by Rey *et al.* (2019) [73]. Each  
446 cow's peaks were then averaged in order to get a unique methane record per cow, as  
447 described in López-Paredes *et al.* (2020) [74]. Animals were distributed in groups  
448 according to number of lactation (NL) and stage of lactation (SL) criteria. Furthermore,  
449 quartile-based qualitative categories were created for CH<sub>4</sub> recordings (ppm), resulting in  
450 a methane factor (CH<sub>4</sub>) with 4 levels (LOW, L-MID, H-MID and HIGH methane  
451 emissions).

## 452 **6.3 Ruminal content sampling**

453 Ruminal fluid was sampled using an oral tube (18 mm diameter and 160 mm long)  
454 connected to a 1000 mL Erlenmeyer flask and continued to a mechanical pump  
455 (Vacubrand ME 2SI, Wertheim, Germany), with all the material contacting the cow being  
456 carefully cleaned between cows. Each animal was moved to an individual stall for this  
457 process. The solid fraction of the ruminal content was discarded by filtering through 4  
458 layers of sterile cheesecloth, while the outcoming liquid fraction was instantly frozen  
459 using liquid nitrogen (LN<sub>2</sub>) and then stored at -80 °C until DNA extraction.

## 460 **6.4 DNA extraction and sequencing**

461 Genomic DNA was extracted from 250 µl of each thawed and homogenized ruminal  
462 content sample, using the "DNeasy Power Soil" commercial kit (QIAGEN, Valencia, CA,  
463 USA). Qubit fluorometer (ThermoFisher Scientific, 150 Waltham, MA, USA) and

464 Nanodrop ND-1000 UV/Vis spectrophotometer (Nanodrop Technologies Inc., DE, USA)  
465 were used to measure DNA concentration and purity. 260/280 and 260/230 ratios were  
466 around 1.8 and 2.0, respectively. Oxford Nanopore Technologies (ONT) SQK-LSK109  
467 Ligation Sequencing kit was used for multiplexed sequencing in MinION automatic  
468 sequencer. The 1D Native barcoding ONT kit (EXP-NBD104 or EXP-NBD114) was used  
469 for multiplexing the samples, pooling barcoded DNA from 12 samples for each run.  
470 Pooling was done using a 1.5 ml DNA LoBind tube to perform adapter ligation and  
471 sequenced using a R9.4.1 flow cell.

## 472 **6.5 Read processing, mapping and filtering**

473 Guppy toolkit (ONT) was used for basecalling. A quality control was then applied  
474 removing sequences with  $QS < 7$  and  $length < 150$  bp. Sequence analysis was performed  
475 using SqueezeMeta (SQM) pipeline for long reads [71], which performs Diamond Blastx  
476 against GenBank nr taxonomic database and against COG and KEGG functional  
477 databases, then identifying and annotating ORFs using the LCA method for taxonomy  
478 and the fun3 algorithm for functional annotation (based on e-value and identity scores).  
479 This tool is specifically designed to process long reads from ONT.

480 49,718,901 reads were processed in Blastx by SQM longreads pipeline. Blastx mapped  
481 25,750,755 reads (51.79%) to taxonomy (NCBI-nr database) or function (KEGG  
482 database). All sequences mapped as non-microbial (*i.e.*, virus, animals and plants) were  
483 discarded. Microbial sequences were then filtered by prevalence to reduce data sparsity  
484 and sequencing errors (**Supplementary Data 2**). A first estimation of sample sparsity and  
485 reads distribution was assessed using R. Two animals were then withdrawn from the  
486 filtered dataset, one due to low read coverage and other due to lack of host information,  
487 leaving 437 animals in the final dataset.

488 Genera were divided into superkingdom groups (Archaea, Bacteria or Eukaryota) and  
489 KEGGs were sorted by their involvement in methane metabolism (MP): KEGGs included  
490 in the KEGG orthology pathway ko00680 (Methane metabolism) were labeled as  
491 “ko00680”, while the rest were identified as “Other”.

## 492 **6.6 Compositional data**

493 Considering the compositional nature of metagenomic data, a CLR method [75] was  
494 applied using the unweighted option of the *CLR* function from the *easyCODA* R package  
495 [76] as follows:

$$496 \quad \mathbf{x}_{\text{clr}} = [\log(x_1/G(x)), \log(x_2/G(x)) \dots \log(x_D/G(x))],$$

497 with  $G(x) = \sqrt[D]{x_1 * x_2 * \dots * x_D}$ .

498 Being  $\mathbf{x} = [x_1, x_2, \dots, x_D]$  a vector of counted features (taxa or KEGGs) in one sample and  
499  $G(x)$  the geometric mean of  $\mathbf{x}$ . Count zero values in the initial data frame were imputed  
500 through the Geometric Bayesian Multiplicative (GBM) procedure, using the  
501 *zCompositions* R package [77] *cmultRepl* function, so that logarithms could be computed.

## 502 **6.7 Beta-diversity and PERMANOVA analysis**

503 The CLR-transformed data (at phylum, class, order, family, genus and KEGG levels)  
504 were used to explore beta-diversity in the samples through PCA using the *prcomp*  
505 function in R. Fitted smooth surface of methane emissions corrected by SL and NL was  
506 included for principal components 1 and 2 using *ordisurf* function from the *vegan* R  
507 package [78]. A generalized additive model smooth fitting (GAM) was used in order to  
508 elucidate non-linear distribution of samples in PCA according to methane emissions.  
509 Differences between centroid distances using methane as grouping variable (CH<sub>4</sub>) were

510 determined through Permutational Multivariate Analysis of Variance (PERMANOVA)  
511 [79,80] following this model and using the matrix of Aitchison distances between samples  
512 (*i.e.*, the Euclidean distance on CLR-transformed data) as input variable:

$$513 \quad D_{jkl ni} = \mu + B_j + SL_k + NL_l + CH4_n + e_{jkl ni}$$

514 with  $B_j$  being the farm-batch effect ( $j = 24$  levels),  $SL_k$  being the stage of lactation at the  
515 day of sampling ( $k = 3$  levels),  $NL_l$  the number of lactation ( $l = 2$  levels) and  $CH4_n$  the  
516 methane emission level ( $n = 4$  levels: LOW, L-MID, H-MID, HIGH), and  $e_{jkl ni}$  was the  
517 corresponding residual term.

## 518 **6.8 Association between microbiota and methane production**

519 Differential abundance of genera and KEGGs between samples regarding the different  
520 methane emissions levels was addressed through linear regression using Limma [81].  
521 Count normalization and log-transformation were addressed using CLR-transformed data  
522 as inputs.  $P$ -values were adjusted by Benjamini-Hochberg method, to control false  
523 discovery rate. Differential abundance threshold was set to  $|\log_2FC| \geq 0.5$  and the  
524 adjusted significance threshold was set to  $\alpha = 0.05$ .

## 525 **6.9 Pairwise proportionality analysis**

526 Pairwise correlations between phyla, genera and KEGGs were calculated as described in  
527 the *propr* R package [82]. Proportionality coefficient  $\rho_p$  [83] under CLR data  
528 transformation was chosen. Thresholds were selected according to two conditions: 1)  
529 representing the maximum number of proportionalities avoiding computational issues; 2)  
530 FDR lower than 1%. Used threshold were  $|\rho_p| \geq 0.4$  for genera proportionalities and  $|\rho_p| \geq$   
531 0.7 for KEGG proportionalities.



## 532 **6.10 Microbial networks**

533 Microbial networks for taxonomy (at the genus level) and functionality were built from  
534 the proportionality matrices described above. Input edges were defined from the  
535 cytoscape function in *propr* package in R, which converts a *propr* object into a data frame  
536 of node connections compatible with Cytoscape software (v. 3.8.0). Results from the DA  
537 analyses were used to associate each feature (node) to high or low methane emissions  
538 levels. Significantly over-abundant genera and KEGGs in the low methane emitters group  
539 (*i.e.*, more abundant in LOW than in HIGH or H-MID groups) were designated as LOW-  
540 associated, while those contrary over-abundant in high methane emitters were appointed  
541 as HIGH-associated. Non-DA features were classified as N/A (not associated). In  
542 addition, SK and MP factors were included as node attributes for genera and KEGGs,  
543 respectively. For graph visualization, Kamada-Kawai algorithm (Edge-weighted spring  
544 embedded layout) was set [84], using  $\rho_p$  coefficient as force parameter.

## 545 **7 Ethical statement**

546 This study was conducted in accordance with Spanish Royal Decree 53/2013 for the  
547 protection of animals used for experimental and other scientific purposes and was  
548 approved by the Basque Institute for Agricultural Research and Development Ethics  
549 Committee (Neiker-OEBA-2017-004) on March 28, 2017.

## 550 **8 Conflict of Interest**

551 The authors have not stated any conflicts of interest.

## 552 **9 Author Contributions**

553 A.L.G. and A.S.M. filtered and prepared the data, implemented the statistical analyses  
554 and prepared the first draft of the manuscript. M.G.R and C.G. performed the DNA  
555 extraction and sequencing. O.G.R. supervised the DNA sequencing and contributed to  
556 the statistical analyses. R.C. contributed to develop interaction networks. O.G.R., A.G.R.,  
557 R.A., I.G. conceived the study and designed the experiments. J.T. and F.P.S developed  
558 the computational pipelines for the metagenome and assisted on its analyses. A.L.G.,  
559 A.S.M. and O.G.R. wrote the manuscript. All authors helped writing and configuring the  
560 last version of the manuscript.

## 561 **10 Funding**

562 This research was financed by RTA2015-00022-C03-02 (METALGEN) and RTI2018-  
563 096487-RC33 projects from the national plan of research, development and innovation  
564 2013-2020 and the Department of Economic Development and Competitiveness (Madrid,  
565 Spain).

## 566 **11 Acknowledgments**

567 We thank the regional Holstein Associations and farmers collaborating in the project.  
568 Computational support from the High-Performance Computing Centre in Galicia (Spain)  
569 is acknowledged. A.L.G. was funded by FPI-INIA grant with reference FPI-SGIT2016-  
570 06.

## 571 **12 Consent for publication**

572 Not applicable.

## 573 **13 Availability of supporting data and material**

574 The datasets generated during and/or analyzed during the current study have been  
575 uploaded to ENA browser, with accession number of the project: PRJEB44278  
576 (<https://www.ebi.ac.uk/ena/browser/view/PRJEB44278>) and can be requested to the  
577 METALGEN project, <https://www.metalgen.es>.

578 SqueezeMeta software is available at <https://github.com/jtamames/SqueezeMeta>.  
579 Guppy basecaller software was used to convert fast5 raw signals to fastq files  
580 (<https://community.nanoporetech.com/downloads>). The R environment and used  
581 packages are available from <https://cran.r-project.org/>. Correspondence and material  
582 requests should be addressed to Oscar González-Recio ([gonzalez.oscar@inia.es](mailto:gonzalez.oscar@inia.es)). Other  
583 data further supporting this work are openly available in the GigaScience repository,  
584 GigaDB [85].

585 **14 References**

- 586 1. Wang B, Yao M, Lv L, Ling Z, Li L. The Human Microbiota in Health and Disease.  
587 *Engineering*. 2017; doi: 10.1016/J.ENG.2017.01.008.
- 588 2. Delgado B, Bach A, Guasch I, González C, Elcoso G, Pryce JE, et al.. Whole rumen  
589 metagenome sequencing allows classifying and predicting feed efficiency and  
590 intake levels in cattle. *Sci Rep*. 2019; doi: 10.1038/s41598-018-36673-w.
- 591 3. Difford GF, Plichta DR, Løvendahl P, Lassen J, Noel SJ, Højberg O, et al.. Host  
592 genetics and the rumen microbiome jointly associate with methane emissions in  
593 dairy cows. Leeb T, editor. *PLoS Genet*. 2018; doi: 10.1371/journal.pgen.1007580.
- 594 4. Weimer PJ. Redundancy, resilience, and host specificity of the ruminal  
595 microbiota: Implications for engineering improved ruminal fermentations. *Front*  
596 *Microbiol*. 2015; doi: 10.3389/fmicb.2015.00296.
- 597 5. Knapp JR, Laur GL, Vadas PA, Weiss WP, Tricarico JM. Invited review: Enteric  
598 methane in dairy cattle production: Quantifying the opportunities and impact of  
599 reducing emissions. *J Dairy Sci*. 2014; doi: 10.3168/JDS.2013-7234.
- 600 6. Gerber, PJ, Steinfeld, Henderson, Mottet, Opio, et al.. Tackling Climate Change  
601 Through Livestock. A global assessment of emissions and mitigation opportunities.  
602 Rome, Italy: Food and Agriculture Organization of the United Nations (FAO); 2013;  
603 doi: www.fao.org/publications.
- 604 7. FAO: Global Livestock Environmental Assessment Model (GLEAM). Food Agric.  
605 Organ. <http://www.fao.org/gleam/results/en/> (2019). Accessed 2021 Aug 4.
- 606 8. Martínez-Álvaro M, Auffret MD, Stewart RD, Dewhurst RJ, Duthie CA, Rooke JA, et  
607 al.. Identification of Complex Rumen Microbiome Interaction Within Diverse  
608 Functional Niches as Mechanisms Affecting the Variation of Methane Emissions in  
609 Bovine. *Front Microbiol*. 2020; doi: 10.3389/fmicb.2020.00659.
- 610 9. Malmuthuge N, Guan LL. Understanding host-microbial interactions in rumen:  
611 Searching the best opportunity for microbiota manipulation. *J Anim Sci Biotechnol*.  
612 2017; doi: 10.1186/s40104-016-0135-3.
- 613 10. Negussie E, de Haas Y, Dehareng F, Dewhurst RJ, Dijkstra J, Gengler N, et al..  
614 Invited review: Large-scale indirect measurements for enteric methane emissions  
615 in dairy cattle: A review of proxies and their potential for use in management and  
616 breeding decisions. *J Dairy Sci*. 2017; doi: 10.3168/jds.2016-12030.
- 617 11. Gloor GB, Macklaim JM, Pawlowsky-Glahn V, Egozcue JJ. Microbiome datasets  
618 are compositional: And this is not optional. *Front Microbiol*. 2017; doi:  
619 10.3389/fmicb.2017.02224.
- 620 12. Liu YX, Qin Y, Chen T, Lu M, Qian X, Guo X, et al.. A practical guide to amplicon  
621 and metagenomic analysis of microbiome data. *Protein Cell*. 2021; doi:  
622 10.1007/s13238-020-00724-8.

- 623 13. Bonk F, Popp D, Harms H, Centler F. PCR-based quantification of taxa-specific  
624 abundances in microbial communities: Quantifying and avoiding common pitfalls. *J*  
625 *Microbiol Methods*. 2018; doi: 10.1016/J.MIMET.2018.09.015.
- 626 14. Brandt C, Bongcam-Rudloff E, Müller B. Abundance tracking by long-read  
627 nanopore sequencing of complex microbial communities in samples from 20  
628 different biogas/wastewater plants. *Appl Sci*. 2020; doi: 10.3390/app10217518.
- 629 15. Burki F, Shalchian-Tabrizi K, Minge M, Skjæveland Å, Nikolaev SI, Jakobsen KS,  
630 et al.. Phylogenomics reshuffles the eukaryotic supergroups. Butler G, editor. *PLoS*  
631 *One*. 2007; doi: 10.1371/journal.pone.0000790.
- 632 16. Kanehisa M, Goto S. KEGG: Kyoto Encyclopedia of Genes and Genomes. *Nucleic*  
633 *Acids Res*. 2000; doi: 10.1093/nar/28.1.27.
- 634 17. Kanehisa M. Toward understanding the origin and evolution of cellular  
635 organisms. *Protein Sci*. 2019; doi: 10.1002/pro.3715.
- 636 18. Kanehisa M, Sato Y, Furumichi M, Morishima K, Tanabe M. New approach for  
637 understanding genome variations in KEGG. *Nucleic Acids Res*. 2019; doi:  
638 10.1093/nar/gky962.
- 639 19. Lovell D, Pawlowsky-Glahn V, Egozcue JJ, Marguerat S, Bähler J.  
640 Proportionality: A Valid Alternative to Correlation for Relative Data. *PLOS Comput*  
641 *Biol*. 2015; doi: 10.1371/journal.pcbi.1004075.
- 642 20. Wallace RJ, Sasson G, Garnsworthy PC, Tapio I, Gregson E, Bani P, et al.. A  
643 heritable subset of the core rumen microbiome dictates dairy cow productivity and  
644 emissions. *Sci Adv*. 2019; doi: 10.1126/sciadv.aav8391.
- 645 21. Shah HN, Collins DM. Prevotella, a new genus to include Bacteroides  
646 melaninogenicus and related species formerly classified in the genus Bacteroides.  
647 *Int J Syst Bacteriol*. 1990; doi: 10.1099/00207713-40-2-205.
- 648 22. Pitta DW, Pinchak WE, Dowd SE, Osterstock J, Gontcharova V, Youn E, et al..  
649 Rumen bacterial diversity dynamics associated with changing from bermudagrass  
650 hay to grazed winter wheat diets. *Microb Ecol*. 2010; doi: 10.1007/s00248-009-  
651 9609-6.
- 652 23. Lee HJ, Jung JY, Oh YK, Lee SS, Madsen EL, Jeon CO. Comparative survey of  
653 rumen microbial communities and metabolites across one caprine and three  
654 bovine groups, using bar-coded pyrosequencing and <sup>1</sup>H nuclear magnetic  
655 resonance spectroscopy. *Appl Environ Microbiol*. 2012; doi: 10.1128/AEM.00104-  
656 12.
- 657 24. Lopes LD, de Souza Lima AO, Taketani RG, Darias P, da Silva LRF, Romagnoli  
658 EM, et al.. Exploring the sheep rumen microbiome for carbohydrate-active  
659 enzymes. *Antonie van Leeuwenhoek, Int J Gen Mol Microbiol*. 2015; doi:  
660 10.1007/s10482-015-0459-6.
- 661 25. Li J, Zhong H, Ramayo-Caldas Y, Terrapon N, Lombard V, Potocki-Veronese G, et

- 662 al.. A catalog of microbial genes from the bovine rumen unveils a specialized and  
663 diverse biomass-degrading environment. *Gigascience*. 2020; doi:  
664 10.1093/gigascience/giaa057.
- 665 26. Seshadri R, Leahy SC, Attwood GT, Teh KH, Lambie SC, Cookson AL, et al..  
666 Cultivation and sequencing of rumen microbiome members from the Hungate1000  
667 Collection. *Nat Biotechnol*. 2018; doi: 10.1038/nbt.4110.
- 668 27. Crespo-Piazuelo D, Estellé J, Revilla M, Criado-Mesas L, Ramayo-Caldas Y, Óvilo  
669 C, et al.. Characterization of bacterial microbiota compositions along the intestinal  
670 tract in pigs and their interactions and functions. *Sci Rep*. 2018; doi:  
671 10.1038/s41598-018-30932-6.
- 672 28. Han GG, Lee JY, Jin GD, Park J, Choi YH, Kang SK, et al.. Tracing of the fecal  
673 microbiota of commercial pigs at five growth stages from birth to shipment. *Sci*  
674 *Rep*. 2018; doi: 10.1038/s41598-018-24508-7.
- 675 29. Ransom-Jones E, Jones DL, McCarthy AJ, McDonald JE. The Fibrobacteres: An  
676 Important Phylum of Cellulose-Degrading Bacteria. *Microb Ecol*. 2012; doi:  
677 10.1007/s00248-011-9998-1.
- 678 30. Newbold CJ, De la Fuente G, Belanche A, Ramos-Morales E, McEwan NR. The  
679 role of ciliate protozoa in the rumen. *Front Microbiol*. 2015; doi:  
680 10.3389/fmicb.2015.01313.
- 681 31. Williams AG, Coleman GS. The Rumen Protozoa. Williams AG, Coleman GS,  
682 editors. New York, NY: Springer New York;
- 683 32. Johnson HP. A contribution to the morphology and biology of the Stentors. *J*  
684 *Morphol*. 1893; doi: 10.1002/jmor.1050080303.
- 685 33. Tartar V. The Biology of Stentor. Tartar V, editor. Oxford, London, New York,  
686 Paris: Pergamon Press;
- 687 34. Wichterman R. The Biology of Paramecium. Wichterman R, editor. New York:  
688 Springer US;
- 689 35. Cavalier-Smith T. The neomuran origin of archaeobacteria, the negibacterial root  
690 of the universal tree and bacterial megaclassification. *Int J Syst Evol Microbiol*.  
691 2002; doi: 10.1099/00207713-52-1-7.
- 692 36. Poulsen M, Schwab C, Borg Jensen B, Engberg RM, Spang A, Canibe N, et al..  
693 Methylophilic methanogenic Thermoplasmata implicated in reduced methane  
694 emissions from bovine rumen. *Nat Commun*. 2013; doi: 10.1038/ncomms2432.
- 695 37. Santos E de O, Thompson F. The family Succinivibrionaceae. In: Rosenberg E,  
696 DeLong EF, Lory S, Stackebrandt E, Thompson F, editors. *The Prokaryotes:*  
697 *Gammaproteobacteria*. Springer, Berlin, Heidelberg;
- 698 38. Gomez-Gil B, Thompson, Cristinane C. Matsumura Y, Sawabe T, Iida T, Christen  
699 R, Thompson F, et al.. The Family Vibrionaceae. In: Rosenberg E, DeLong EF, Lory S,

- 700 Stackebrandt E, Thompson F, editors. *The Prokaryotes: Gammaproteobacteria*.  
701 Springer, Berlin, Heidelberg;
- 702 39. Ivanova EP, Ng HJ, Webb HK. The family Pseudoalteromonadaceae. In:  
703 Rosenberg E, DeLong EF, Lory S, Stackebrandt E, Thompson F, editors. *The*  
704 *Prokaryotes: Gammaproteobacteria*. Springer, Berlin, Heidelberg;
- 705 40. Marchandin H, Jumas-Bilak E. The family Veillonellaceae. In: Rosenberg E,  
706 DeLong EF, Lory S, Stackebrandt E, Thompson F, editors. *The Prokaryotes:*  
707 *Firmicutes and Tenericutes*. Springer, Berlin, Heidelberg;
- 708 41. Shah HN, Collins MD. Reclassification of *Bacteroides multiacidus* (Mitsuoka,  
709 Terada, Watanabe and Uchida) in a new genus *Mitsuokella*, as *Mitsuokella*  
710 *multiacidus* comb. nov. *Zentralblatt für Bakteriologie Angewandte und Allgemeine Mikrobiologie*  
711 *OrigC Hyg.* 1982; doi: 10.1016/S0721-9571(82)80006-9.
- 712 42. Kittelmann S, Pinares-Patiño CS, Seedorf H, Kirk MR, Ganesh S, McEwan JC, et  
713 al.. Two Different Bacterial Community Types Are Linked with the Low-Methane  
714 Emission Trait in Sheep. *PLoS One.* 2014; doi: 10.1371/JOURNAL.PONE.0103171.
- 715 43. Wallace RJ, Rooke JA, Duthie CA, Hyslop JJ, Ross DW, McKain N, et al.. Archaeal  
716 abundance in post-mortem ruminal digesta may help predict methane emissions  
717 from beef cattle. *Sci Rep.* 2014; doi: 10.1038/srep05892.
- 718 44. Morgavi DP, Martin C, Jouany JP, Ranilla MJ. Rumen protozoa and  
719 methanogenesis: Not a simple cause-effect relationship. *Br J Nutr.* 2012; doi:  
720 10.1017/S0007114511002935.
- 721 45. Tapio I, Snelling TJ, Strozzi F, Wallace RJ. The ruminal microbiome associated  
722 with methane emissions from ruminant livestock. *J Anim Sci Biotechnol.* 2017; doi:  
723 10.1186/s40104-017-0141-0.
- 724 46. Danielsson R, Dicksved J, Sun L, Gonda H, Müller B, Schnürer A, et al.. Methane  
725 production in dairy cows correlates with rumen methanogenic and bacterial  
726 community structure. *Front Microbiol.* 2017; doi: 10.3389/fmicb.2017.00226.
- 727 47. Shi W, Moon CD, Leahy SC, Kang D, Froula J, Kittelmann S, et al.. Methane yield  
728 phenotypes linked to differential gene expression in the sheep rumen microbiome.  
729 *Genome Res.* 2014; doi: 10.1101/gr.168245.113.
- 730 48. Wallace RJ, Rooke JA, McKain N, Duthie CA, Hyslop JJ, Ross DW, et al.. The  
731 rumen microbial metagenome associated with high methane production in cattle.  
732 *BMC Genomics.* 2015; doi: 10.1186/s12864-015-2032-0.
- 733 49. Aguinaga Casañas MA, Rangkasenee N, Krattenmacher N, Thaller G, Metges CC,  
734 Kuhla B. Methyl-coenzyme M reductase A as an indicator to estimate methane  
735 production from dairy cows. *J Dairy Sci.* 2015; doi: 10.3168/jds.2015-9310.
- 736 50. Janssen PH, Kirs M. Structure of the archaeal community of the rumen. *Appl*  
737 *Environ Microbiol.* 2008; doi: 10.1128/AEM.02812-07.

- 738 51. Newbold CJ, Lassalas B, Jouany JP. The importance of methanogens associated  
739 with ciliate protozoa in ruminal methane production in vitro. *Lett Appl Microbiol.*  
740 1995; doi: 10.1111/j.1472-765X.1995.tb01048.x.
- 741 52. Qin WZ, Li CY, Kim JK, Ju JG, Song MK. Effects of defaunation on fermentation  
742 characteristics and methane production by rumen microbes in vitro when  
743 incubated with starchy feed sources. *Asian-Australasian J Anim Sci.* 2012; doi:  
744 10.5713/ajas.2012.12240.
- 745 53. Schönhusen U, Zitnan R, Kuhla S, Jentsch W, Derno M, Voigt J. Effects of  
746 protozoa on methane production in rumen and hindgut of calves around time of  
747 weaning. *Arch Anim Nutr.* 2003; doi: 10.1080/00039420310001594423.
- 748 54. Guyader J, Eugène M, Nozière P, Morgavi DP, Doreau M, Martin C. Influence of  
749 rumen protozoa on methane emission in ruminants: a meta-analysis approach.  
750 *Animal.* 2014; doi: 10.1017/S1751731114001852.
- 751 55. Belanche A, de la Fuente G, Newbold CJ. Study of methanogen communities  
752 associated with different rumen protozoal populations. *FEMS Microbiol Ecol.* 2014;  
753 doi: 10.1111/1574-6941.12423.
- 754 56. Hackstein JHP, de Graaf RM. Anaerobic Ciliates and Their Methanogenic  
755 Endosymbionts. In: Hackstein JHP, editor. *(Endo)symbiotic Methanogenic Archaea.*  
756 2nd ed. Berlin: Springer Berlin;
- 757 57. Roopnarain A, Mukhuba M, Adeleke R, Moeletsi M. Biases during DNA  
758 extraction affect bacterial and archaeal community profile of anaerobic digestion  
759 samples. *Biotech.* 2017; doi: 10.1007/s13205-017-1009-x.
- 760 58. Esquivel-Elizondo S, Ilhan ZE, Garcia-Peña EI, Krajmalnik-Brown R. Insights  
761 into Butyrate Production in a Controlled Fermentation System via Gene  
762 Predictions. *mSystems.* 2017; doi: 10.1128/msystems.00051-17.
- 763 59. Crable BR, Plugge CM, McInerney MJ, Stams AJM. Formate formation and  
764 formate conversion in biological fuels production. *Enzyme Res.* 2011; doi:  
765 10.4061/2011/532536.
- 766 60. Hao L, Michaelsen TY, Singleton CM, Dottorini G, Kirkegaard RH, Albertsen M, et  
767 al.. Novel syntrophic bacteria in full-scale anaerobic digesters revealed by genome-  
768 centric metatranscriptomics. *ISME J.* 2020; doi: 10.1038/s41396-019-0571-0.
- 769 61. Brown TDK, Jones-Mortimer MC, Kornberg HL. The enzymic interconversion of  
770 acetate and acetyl-coenzyme A in *Escherichia coli*. *J Gen Microbiol.* 1977; doi:  
771 10.1099/00221287-102-2-327.
- 772 62. Xie M, Chen HH, Nie SP, Yin JY, Xie MY. Gamma-aminobutyric acid increases the  
773 production of short-chain fatty acids and decreases pH values in mouse colon.  
774 *Molecules.* 2017; doi: 10.3390/molecules22040653.
- 775 63. Graham DE. 2-oxoacid metabolism in methanogenic CoM and CoB biosynthesis.  
776 *Methods Enzymol.* Academic Press Inc.;



- 777 64. Klüber HD, Conrad R. Effects of nitrate, nitrite, NO and N<sub>2</sub>O on methanogenesis  
778 and other redox processes in anoxic rice field soil. *FEMS Microbiol Ecol.* 2006; doi:  
779 10.1111/j.1574-6941.1998.tb00482.x.
- 780 65. Yang C, Rooke JA, Cabeza I, Wallace RJ. Nitrate and inhibition of ruminal  
781 methanogenesis: Microbial ecology, obstacles, and opportunities for lowering  
782 methane emissions from ruminant livestock. *Front Microbiol.* 2016; doi:  
783 10.3389/fmicb.2016.00132.
- 784 66. Lee C, Beauchemin KA. Une revue de l'ajout de nitrate dans l'alimentation des  
785 ruminants : Toxicité aux nitrates, émissions de méthane et performance de  
786 production. *Can J Anim Sci.* 2014; doi: 10.4141/CJAS-2014-069.
- 787 67. Cui X. The bacteriocidal effects of transition metal complexes containing the  
788 NO<sup>+</sup> group on the food-spoilage bacterium *Clostridium sporogenes*. *FEMS*  
789 *Microbiol Lett.* 1992; doi: 10.1016/0378-1097(92)90133-9.
- 790 68. Zumft WG. The biological role of nitric oxide in bacteria. *Arch Microbiol.* 1993;  
791 doi: 10.1007/BF00292074.
- 792 69. Reed B, Dinn J, McCann S, Wilson P, O'Sullivan H, Weir DG, et al.. Alterations in  
793 mammalian cells induced by inactivation of vitamin B12 with nitrous oxide. In:  
794 Zagalak B, Friedrich W, editors. *Vitam B12*. Zürich: De Gruyter;
- 795 70. Klüber HD, Conrad R. Inhibitory effects of nitrate, nitrite, NO and N<sub>2</sub>O on  
796 methanogenesis by *Methanosarcina barkeri* and *Methanobacterium bryantii*. *FEMS*  
797 *Microbiol Ecol.* 1998; doi: 10.1111/j.1574-6941.1998.tb00484.x.
- 798 71. Tamames J, Puente-Sánchez F. SqueezeMeta, A Highly Portable, Fully Automatic  
799 Metagenomic Analysis Pipeline. *Front Microbiol.* 2019; doi:  
800 10.3389/fmicb.2018.03349.
- 801 72. Stewart RD, Auffret MD, Warr A, Walker AW, Roehe R, Watson M. Compendium  
802 of 4,941 rumen metagenome-assembled genomes for rumen microbiome biology  
803 and enzyme discovery. *Nat Biotechnol.* 2019; doi: 10.1038/s41587-019-0202-3.
- 804 73. Rey J, Atxaerandio R, Ruiz R, Ugarte E, González-Recio O, Garcia-Rodriguez A, et  
805 al.. Comparison Between Non-Invasive Methane Measurement Techniques in  
806 Cattle. *Animals.* 2019; doi: 10.3390/ani9080563.
- 807 74. López-Paredes J, Goiri I, Atxaerandio R, García-Rodríguez A, Ugarte E, Jiménez-  
808 Montero JA, et al.. Mitigation of greenhouse gases in dairy cattle via genetic  
809 selection: 1. Genetic parameters of direct methane using noninvasive methods and  
810 proxies of methane. *J Dairy Sci.* ; 2020; doi: 10.3168/jds.2019-17597.
- 811 75. Aitchison J. The Statistical Analysis of Compositional Data. *J R Stat Soc Ser B.*  
812 1982; doi: 10.1111/j.2517-6161.1982.tb01195.x.
- 813 76. Greenacre M. Package "easyCODA". Compositional Data Analysis in Practice.  
814 Chapman & Hall / CRC Press; p. 35.

815 77. Palarea-Albaladejo J, Martín-Fernández JA. ZCompositions - R package for  
816 multivariate imputation of left-censored data under a compositional approach.  
817 Chemom. Intell. Lab. Syst.

818 78. Oksanen J, Blanchet FG, Friendly M, Kindt R, Legendre P, Mcglinn D, et al..  
819 vegan: Community Ecology Package. R package version 2.5-6.

820 79. Anderson MJ. A new method for non-parametric multivariate analysis of  
821 variance. *Austral Ecol.* 2001; doi: 10.1111/j.1442-9993.2001.01070.pp.x.

822 80. McArdle BH, Anderson MJ. Fitting multivariate models to community data: A  
823 comment on distance-based redundancy analysis. *Ecology.* 2001; doi:  
824 10.1890/0012-9658(2001)082[0290:FMMTCD]2.0.CO;2.

825 81. Ritchie ME, Phipson B, Wu D, Hu Y, Law CW, Shi W, et al.. limma powers  
826 differential expression analyses for RNA-sequencing and microarray studies.  
827 *Nucleic Acids Res.* 2015; doi: 10.1093/nar/gkv007.

828 82. Quinn TP, Richardson MF, Lovell D, Crowley TM. Propr: An R-package for  
829 Identifying Proportionally Abundant Features Using Compositional Data Analysis.  
830 *Sci Rep.* 2017; doi: 10.1038/s41598-017-16520-0.

831 83. Erb I, Notredame C. How should we measure proportionality on relative gene  
832 expression data? *Theory Biosci.* 2016; doi: 10.1007/s12064-015-0220-8.

833 84. Kamada T, Kawai S. An algorithm for drawing general undirected graphs. *Inf*  
834 *Process Lett.* 1989; doi: 10.1016/0020-0190(89)90102-6.

835 85. López-García A; Saborío-Montero A; Gutiérrez-Rivas M; Atxaerandio R; Goiri I;  
836 García-Rodríguez A; Jiménez-Montero JA; González C; Tamames J; Puente-Sánchez  
837 F; Serrano M; Carrasco R; Óvilo C; Gonzalez-Recio O: Supporting data for "Fungal  
838 and ciliate protozoa are the main rumen microbes associated with methane  
839 emissions in dairy cattle" GigaScience Database. 2021.  
840 <http://dx.doi.org/10.5524/100950>

841

## 842 15 Tables

843 **Table 1:** F statistic and P-values for stage of lactation (SL), number of lactation (NL) and  
844 methane emission (CH<sub>4</sub>) variables (added sequentially) and P-values from  
845 PERMANOVA of the entire dataset (i.e., including all superkingdoms).

|        |                 | F statistic | R <sup>2</sup> | P-value* |
|--------|-----------------|-------------|----------------|----------|
| Phylum | SL              | 6.1         | 0.014          | <0.01    |
|        | NL              | 1.4         | 0.003          | 0.11     |
|        | CH <sub>4</sub> | 2.8         | 0.019          | <0.01    |
| Class  | SL              | 5.6         | 0.013          | <0.01    |
|        | NL              | 1.5         | 0.003          | 0.07     |

|        |            |     |       |                 |
|--------|------------|-----|-------|-----------------|
|        | <i>CH4</i> | 2.4 | 0.016 | <i>&lt;0.01</i> |
| Order  | <i>SL</i>  | 5.4 | 0.012 | <i>&lt;0.01</i> |
|        | <i>NL</i>  | 1.7 | 0.004 | <i>0.03</i>     |
|        | <i>CH4</i> | 2.3 | 0.016 | <i>&lt;0.01</i> |
| Family | <i>SL</i>  | 4.9 | 0.011 | <i>&lt;0.01</i> |
|        | <i>NL</i>  | 1.6 | 0.004 | <i>0.03</i>     |
|        | <i>CH4</i> | 2.1 | 0.014 | <i>&lt;0.01</i> |
| Genus  | <i>SL</i>  | 4.0 | 0.009 | <i>&lt;0.01</i> |
|        | <i>NL</i>  | 1.4 | 0.003 | <i>0.03</i>     |
|        | <i>CH4</i> | 1.7 | 0.012 | <i>&lt;0.01</i> |
| KEGG   | <i>SL</i>  | 5.3 | 0.012 | <i>&lt;0.01</i> |
|        | <i>NL</i>  | 2.0 | 0.004 | <i>0.02</i>     |
|        | <i>CH4</i> | 2.4 | 0.016 | <i>&lt;0.01</i> |

846 \*Significance level was considered 0.05. P-values lower than this  
847 significance levels are in italics.

848

## 849 16 Figure captions

850 **Figure 1: Average relative abundance of genera.** Average relative abundance of core  
851 microbial taxa, including those classified only to family level (i.e., unclassified genera),  
852 which represent a 60.2% of total abundance.

853 **Figure 2: Metagenome functionality.** TreeMap distribution of functionality abundances  
854 classified as KEGG pathways (left) and BRITE hierarchies (right) associated with core  
855 KEGG subcomposition.

856 **Figure 3. Fitted surface representation of Principal Component Analysis.** Dots  
857 represent the samples using euclidean distances of CLR-transformed taxa abundances,  
858 coloured by CH<sub>4</sub> levels. CH<sub>4</sub> emissions (ppm) corrected by number and stage of lactation  
859 are represented as smooth fitting following a generalized additive model (GAM) (–). Dev.  
860 Explained: variability explained by GAM; P-val: approximate significance of the smooth  
861 terms being zero ( $\alpha=0.05$ ).

862 **Figure 4. Volcano plots.** Volcano plot representing the differential abundance (DA) of  
863 genera (A) and KEGGs (B) between LOW and HIGH groups from limma. Significance

864 thresholds were established at  $adj.P-val = 0.05$  and  $\log_2FC = \pm 0.5$ . • Significant features  
865 with DA above the fold change (FC) threshold. • Significant features with DA below the  
866 FC threshold. • Non-significant features with DA above the FC threshold. • Non-  
867 significant features with DA below the FC threshold.

868 **Figure 5. Taxonomy interaction network.** Pairwise proportionalities between genera  
869 with  $|p_p| \geq 0.4$ . Superkingdom:  $\Delta$  Archaea;  $\square$  Bacteria;  $\bigcirc$  Eukaryota. / CH<sub>4</sub> association:  
870  $\text{---}$  HIGH CH<sub>4</sub>;  $\text{---}$  LOW CH<sub>4</sub>;  $\text{---}$  No CH<sub>4</sub> associated. / Proportionality sense:  $\leftrightarrow$  direct ( $>$   
871 0);  $\leftrightarrow$  inverse ( $<$  0).

872 **Figure 6. Functionality interaction network.** Presented pairwise proportionalities  
873 between KEGGs with  $|p_p| \geq 0.7$ / Participation in methane metabolism:  $\square$  ko00680 (direct  
874 or indirect part.);  $\bigcirc$  Other (no part.) / CH<sub>4</sub> association:  $\text{---}$  HIGH CH<sub>4</sub>;  $\text{---}$  LOW CH<sub>4</sub>;  $\text{---}$   
875 No CH<sub>4</sub> associated. / Proportionality sense:  $\leftrightarrow$  direct ( $>$  0);  $\leftrightarrow$  inverse ( $<$  0). Clusters are  
876 indicated as L (KEGGs associated to LOW methane), H (KEGGs associated to HIGH  
877 methane) and N (KEGGs not related to methane emissions).

878 **Figure 7: Taxonomy of ko00680 KEGGs.** Relative abundance of KEGGs present in  
879 ko00680 pathway for each phylum in Archaea ( $\text{---}$ ), Bacteria ( $\text{---}$ ) and Eukaryota ( $\text{---}$ )  
880 superkingdoms. Relative abundance of each ko00680-KEGG respect to the sum of reads  
881 mapped to all ko00680-KEGGs.

882 **Figure 8. Taxonomic distribution of DA KEGGs.** Red density scale represents KEGGs  
883 over-abundant (OA) in HIGH emitters; Blue density scale represents KEGGs OA in LOW  
884 emitters. More intense colors mean a higher number of reads assigned to one phylum.  
885 Superkingdom: • Archaea; • Bacteria; • Eukaryota.

886 **Supplementary Figure 1: Feature counts distribution.** Features with zero counts,  
887 singletons, doubletons and 3 or more counts per sample. A) Count distribution in raw  
888 taxonomy table (87% sparsity); B) Count distribution in filtered taxonomy table (68%  
889 sparsity); C) Count distribution in raw KEGG table (72% sparsity); D) Count distribution  
890 in filtered KEGG table (39% sparsity). Filtering processes removed less than 1% of total  
891 reads in both datasets.

892 **Supplementary Figure 2: Phyla relative abundance per sample.** Samples are sorted  
893 from lowest to highest RA of *Bacteroidetes*.

894



KEGG Pathway abundance treemap

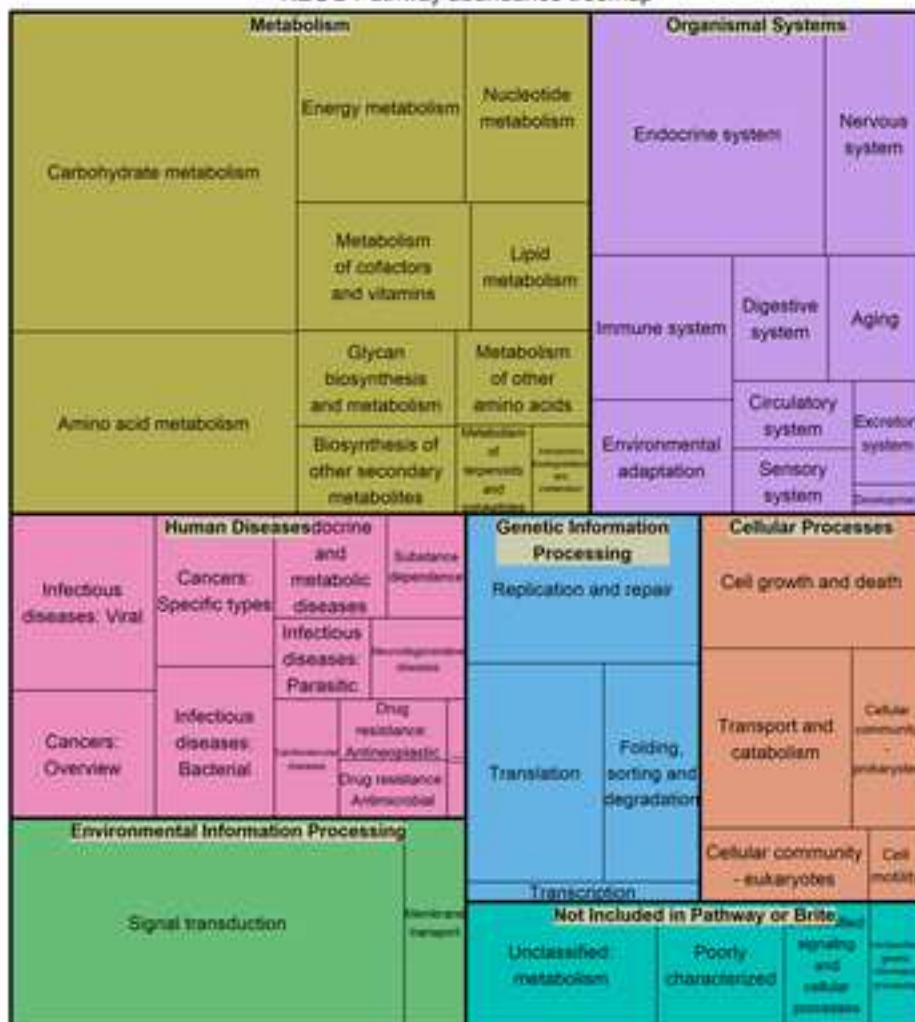

BRITE Hierarchies abundance treemap

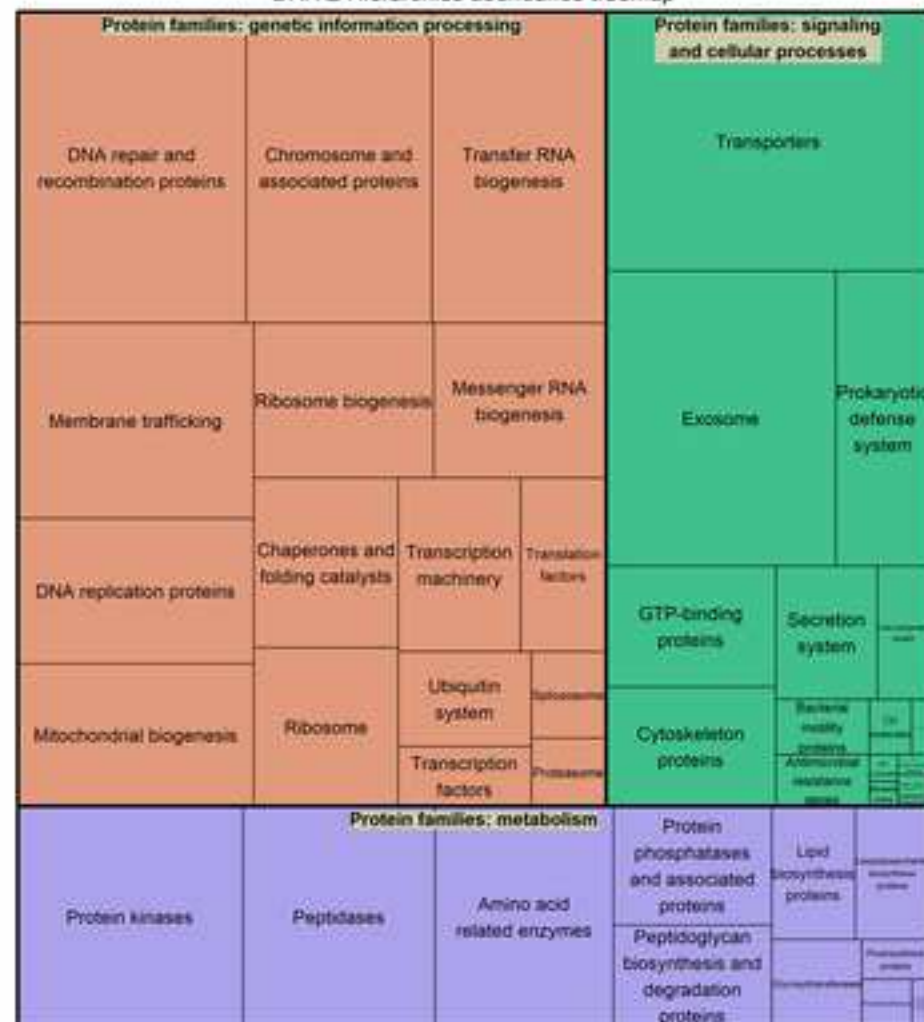



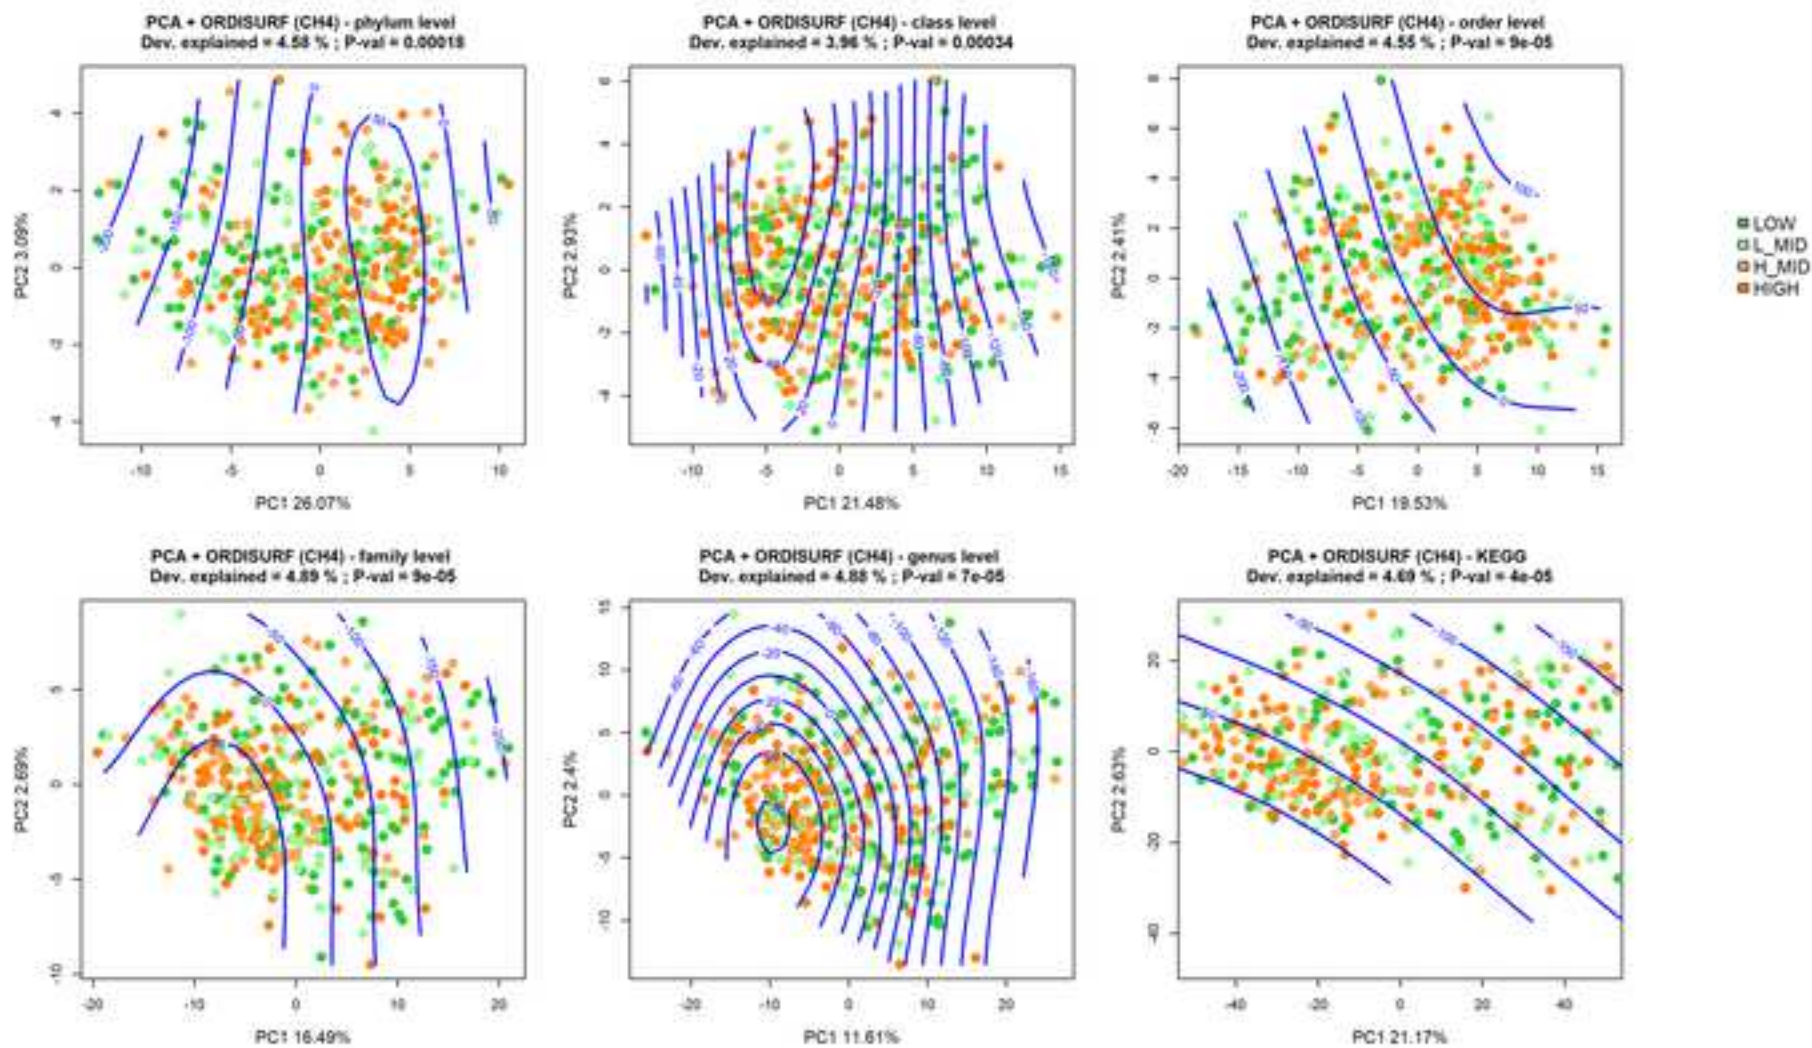



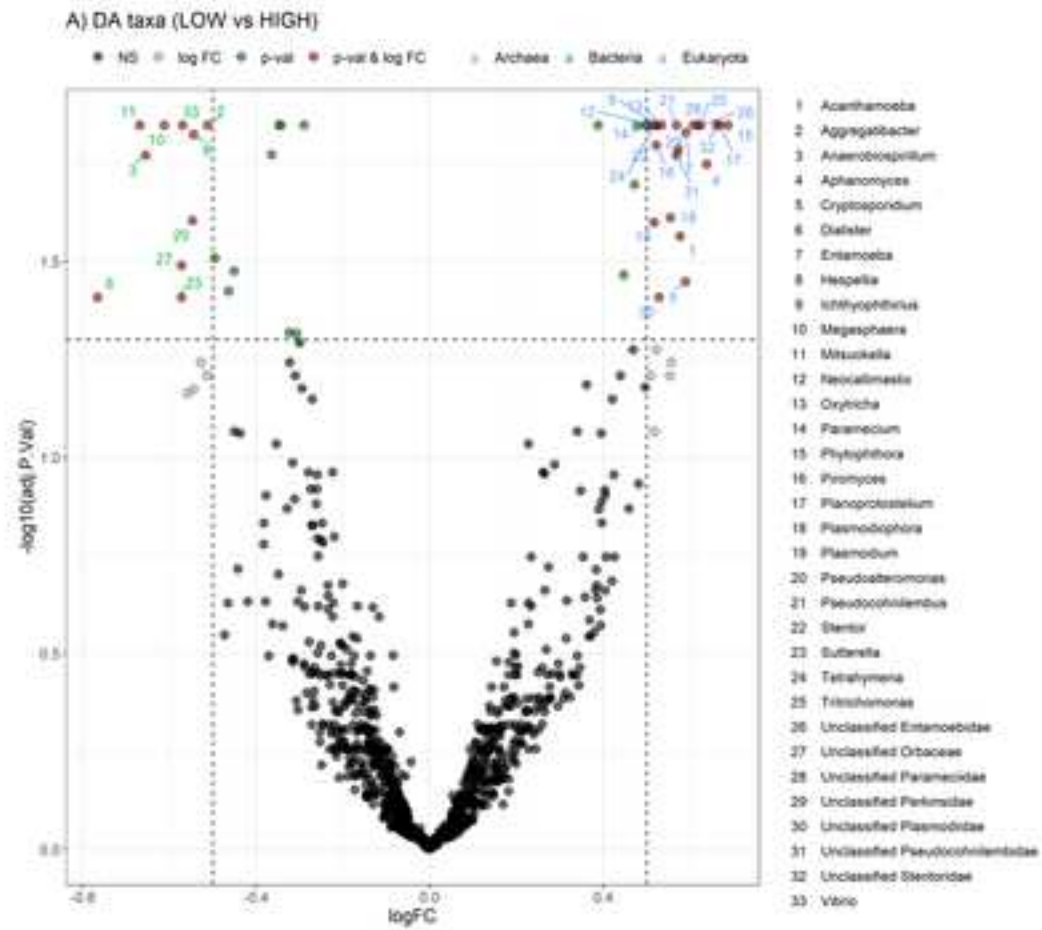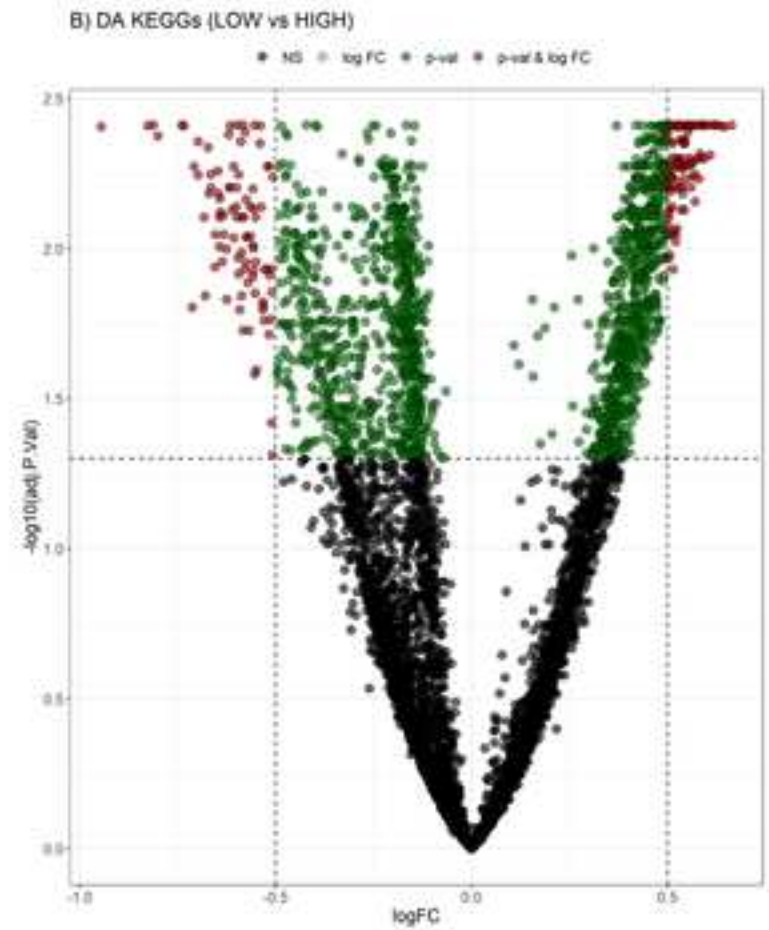

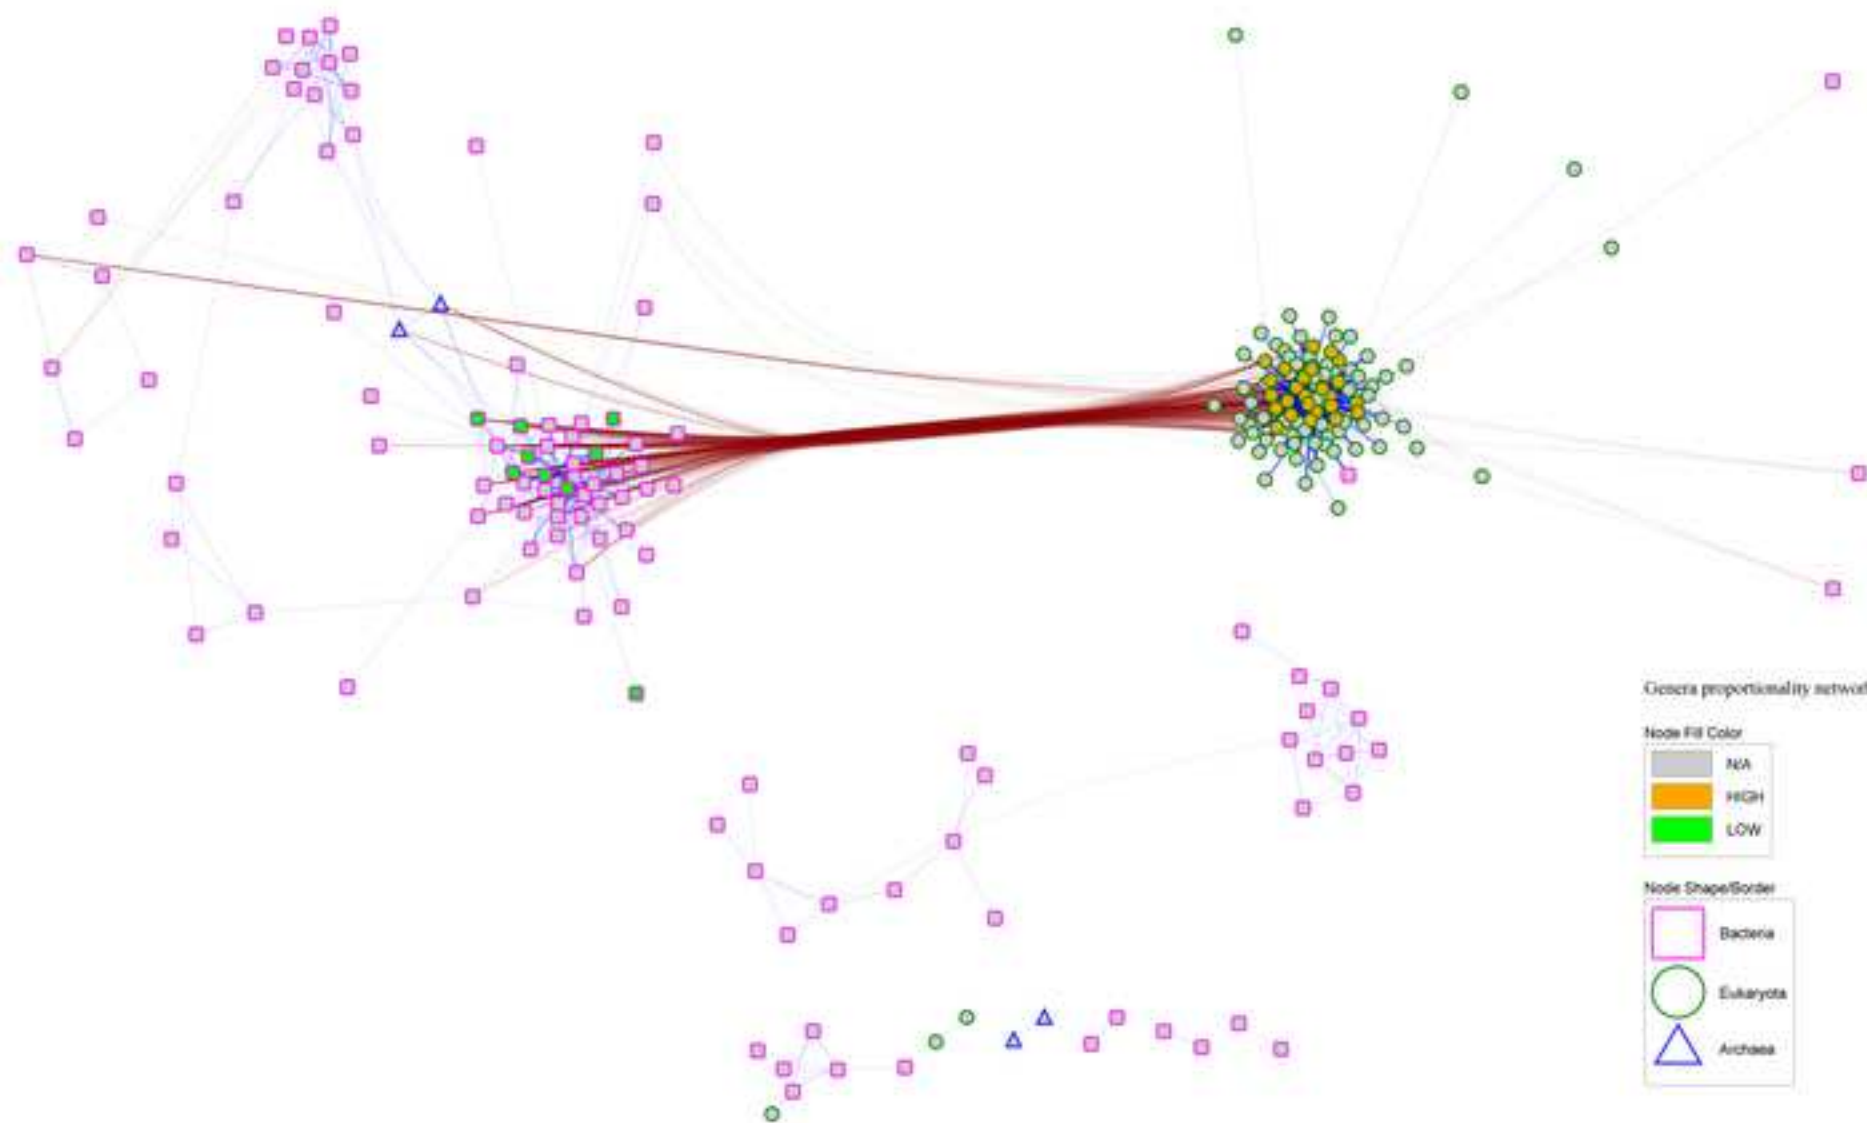

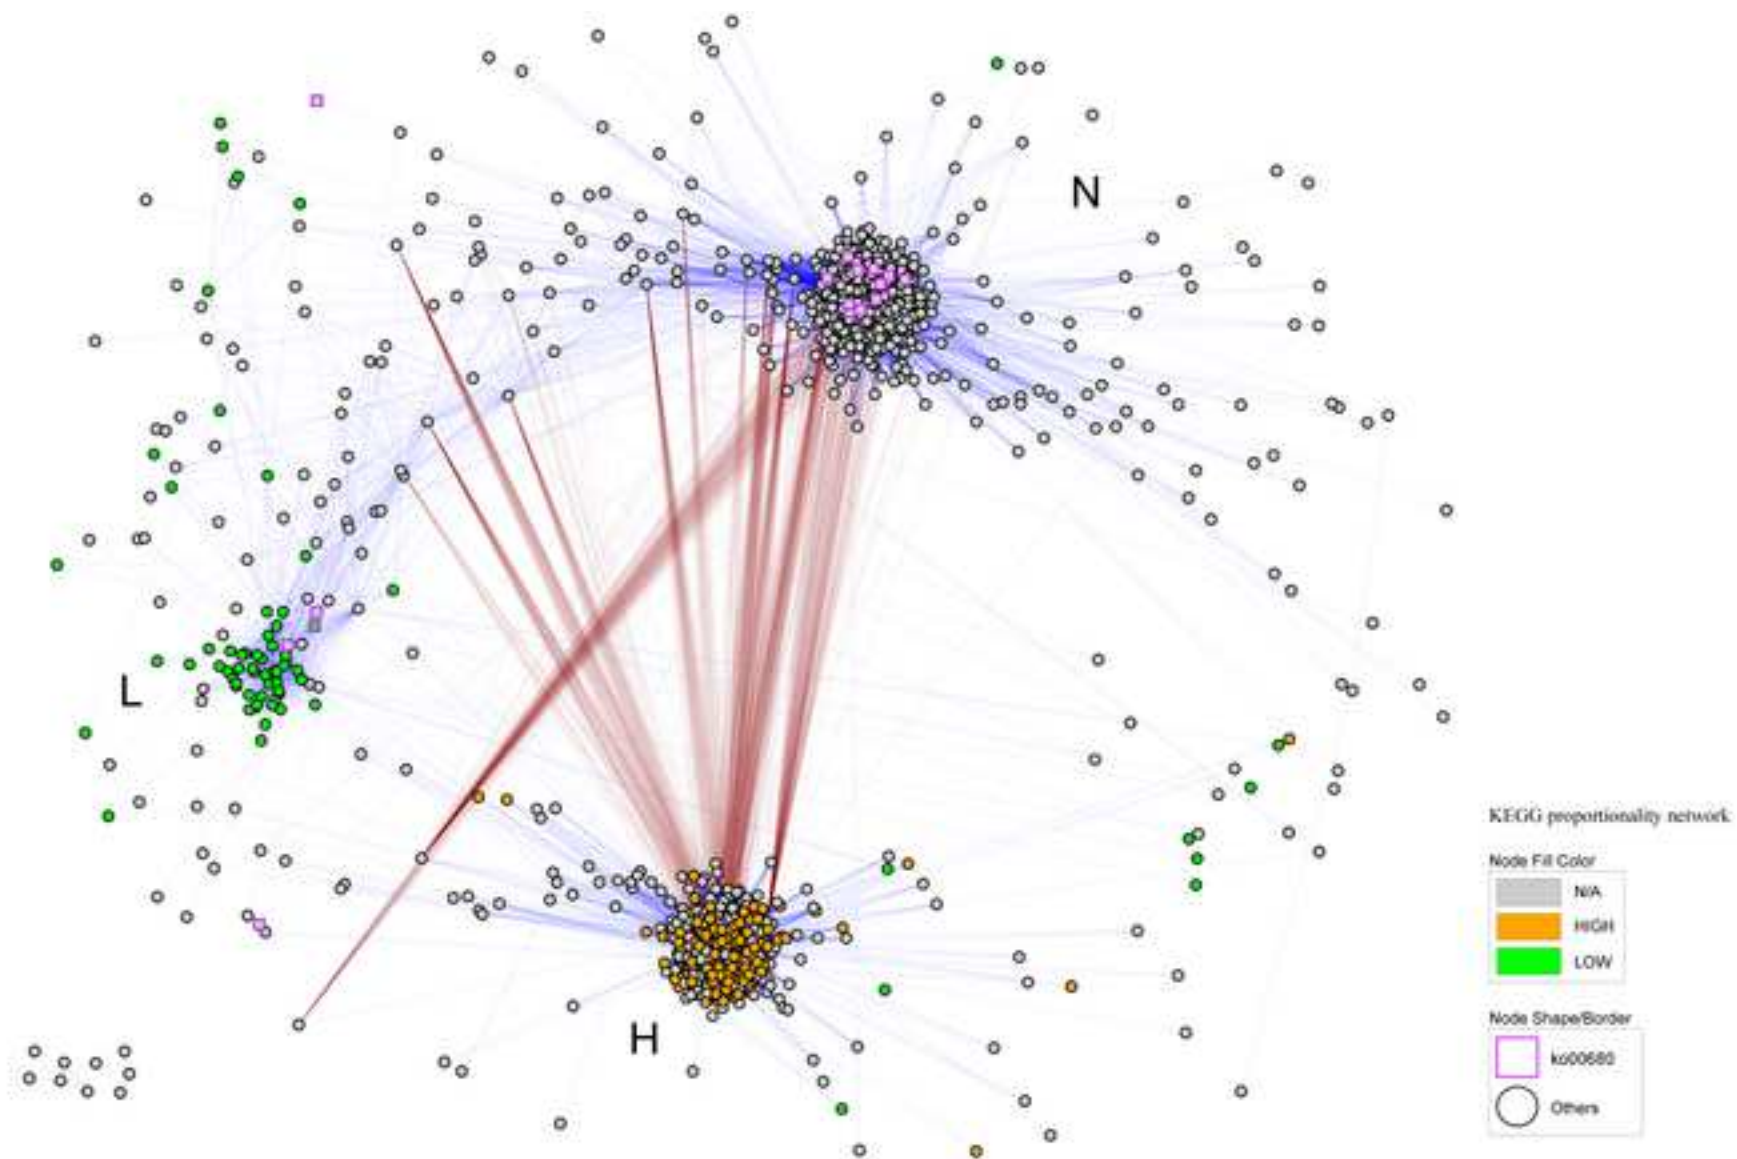

Figure 7

[Click here to access/download;Figure;Fig7.tif](#)

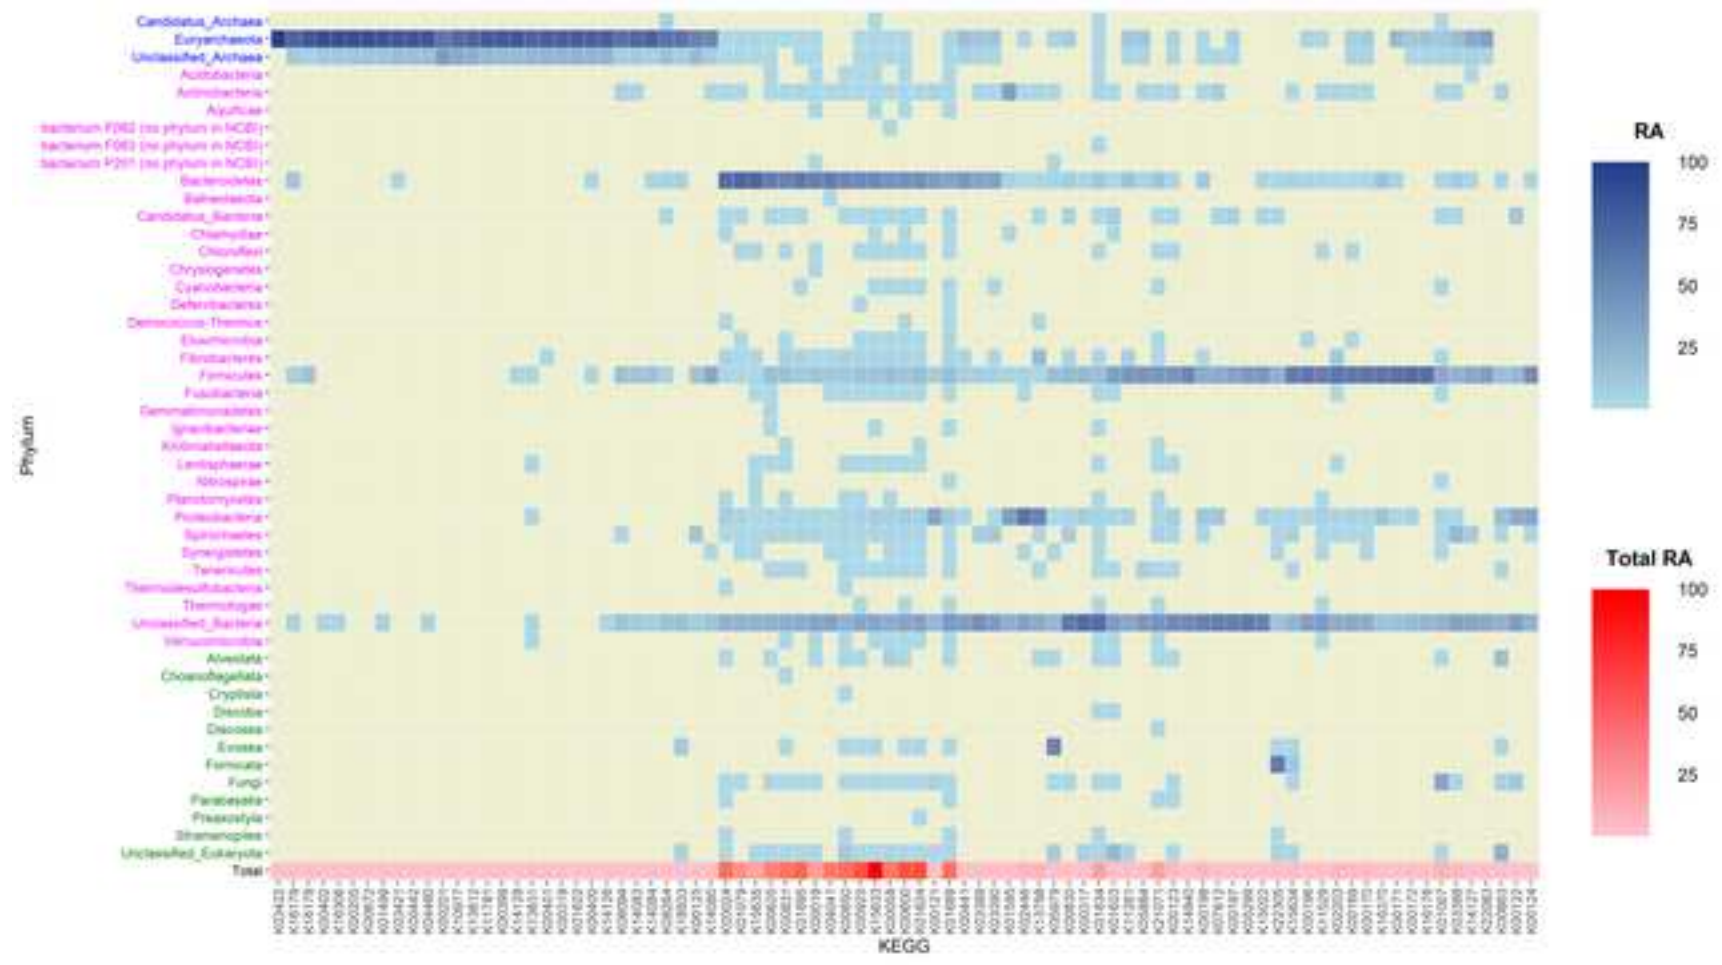



Figure 8

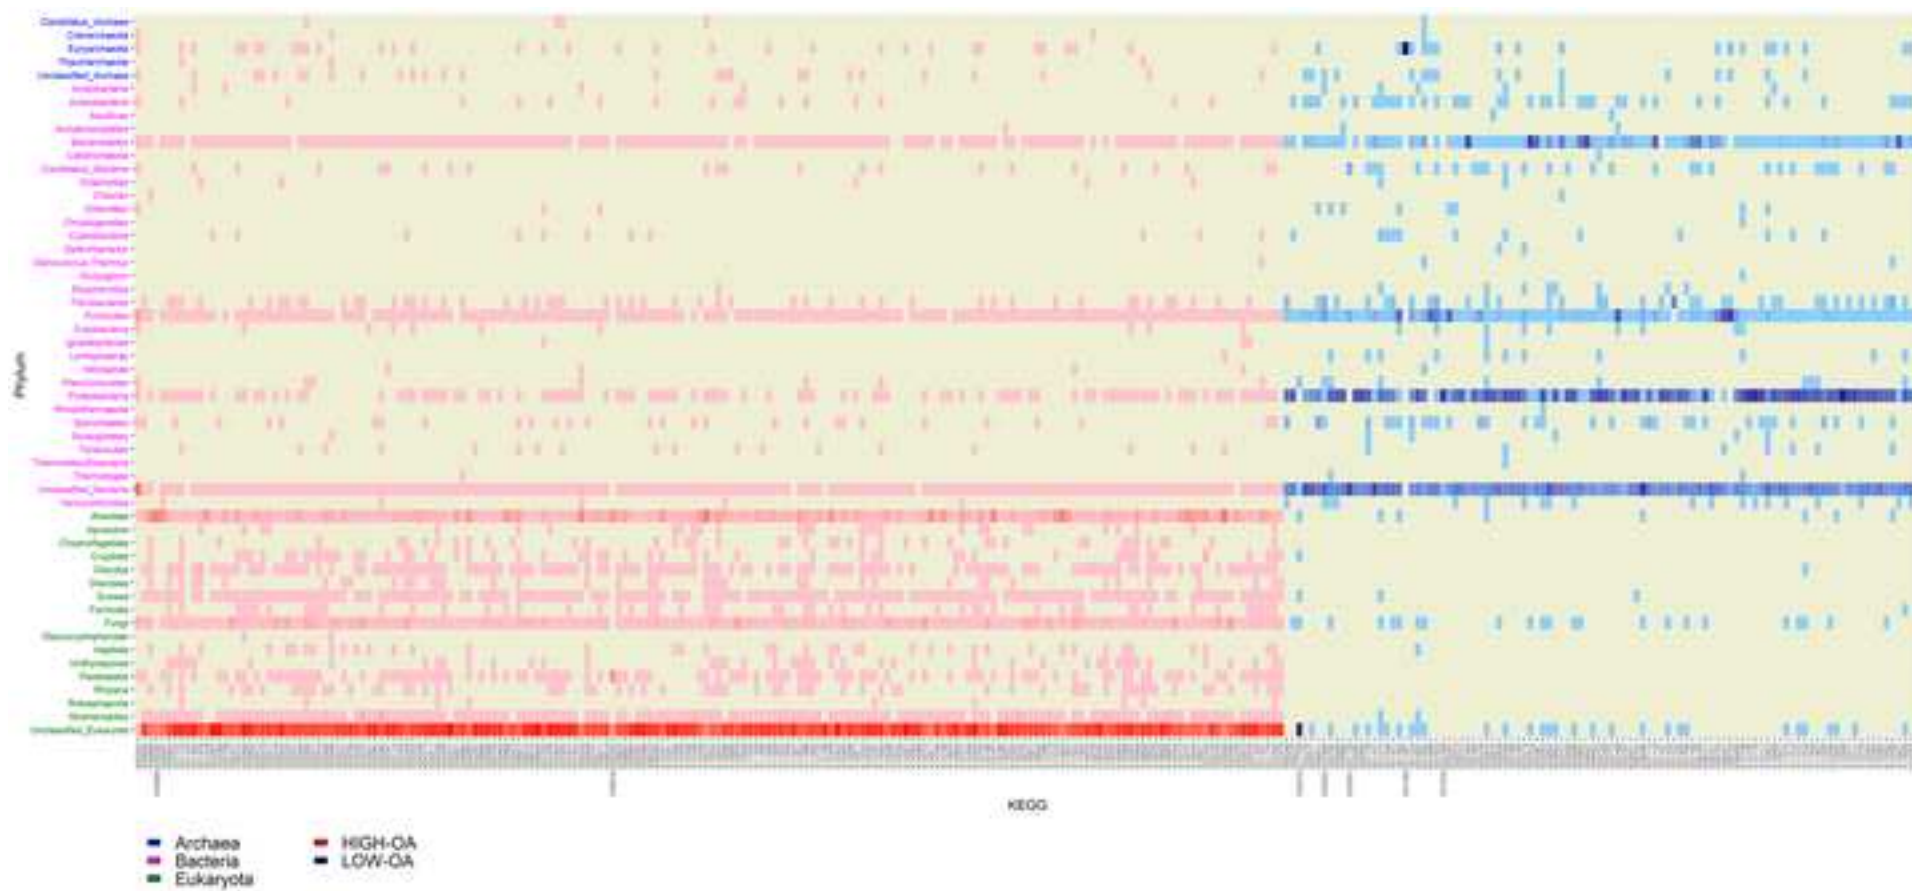



Click here to access/download  
**Supplementary Material**  
SFig1.tif





Click here to access/download  
**Supplementary Material**  
SFig2.tif



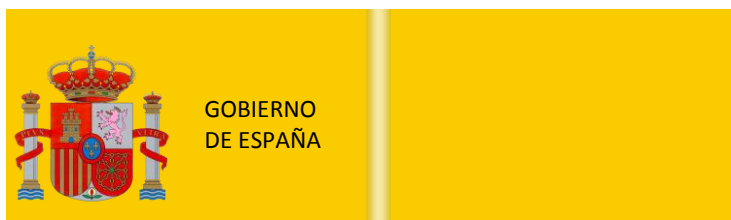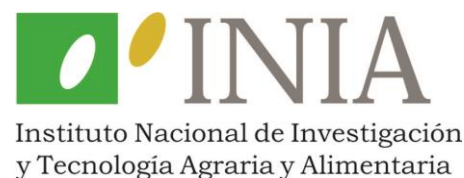

DEPARTAMENTO DE MEJORA GENETICA ANIMAL

Madrid, 28th October, 2021

Dear Editor Nicole Nogoy,

herewith, we re-submit our manuscript entitled "FUNGAL AND CILIATE PROTOZOA ARE THE MAIN RUMEN MICROBES ASSOCIATED WITH METHANE EMISSIONS IN DAIRY CATTLE", to be considered for publication in GigaScience.

The manuscript was previously submitted to GigaScience with manuscript ID: GIGA-D-21-00239. The manuscript was reviewed by three reviewers. Two of them recommended acceptance, whereas only one rejection. Unfortunately, the final decision was rejection. However, you kindly opened the door for a resubmission of the manuscript if we could address this reviewer's concerns in a full cover letter.

Hence, we took this opportunity and resubmit the manuscript explaining that we strongly disagree with the reasons given by the reviewer that led to rejection of the manuscript:

- 1) the reviewer stated that the way we annotated genes is not correct. He said "*I do not think it is at all clear that a DIAMOND search against the NR database (which is full of errors) will accurately reconstruct rumen taxonomy, nor do I believe that a DIAMOND search against KEGG or COG will reconstruct rumen function*". And he provided some reference as example on how to properly do the search. Our method is actually the same procedure as the one used in the references he provided as an example on how to do this (which he actually coauthored): (<https://www.nature.com/articles/s41467-018-03317-6>). In this manuscript they stated: "*Proteins were predicted using Prodigal (v.2.6.3) with option '-p meta'. Using DIAMOND, each protein was searched against KEGG (downloaded on 15 September 2018), UniRef100, UniRef90 and UniRef50 (downloaded 3 October 2018), and CAZy (dbCAN2 version, 31 July 2018). The protein predictions were clustered by CD-HIT<sup>68</sup>(v.4.7) at 100%, 90% and 50% identity, mirroring similar methods at UniRef.*".

The reviewer assumed that the pipeline is not correct, but it actually follows the same procedure as the one cited by the reviewer as reference. The reviewer did not take the time to read how our pipeline works, which is fully described elsewhere: e.g. <https://www.frontiersin.org/articles/10.3389/fmicb.2018.03349/full>, <https://bmcbioinformatics.biomedcentral.com/articles/10.1186/s12859-020-03703-2>. Detailed descriptions can be also found in the manual ([https://github.com/jtamames/SqueezeMeta/blob/master/SqueezeMeta\\_manual\\_v1.4.0.pdf](https://github.com/jtamames/SqueezeMeta/blob/master/SqueezeMeta_manual_v1.4.0.pdf)).

- 2) The second concern of the reviewer was: "*The data presented directly contradict previous results (e.g. <https://bmcgenomics.biomedcentral.com/articles/10.1186/s12864-015-2032-0>) and so the authors need to ensure they are sound.*" The manuscript he provided used results based on 16S and 18S RNA amplicons using abundances from qPCR. I'm not going to give details on how troublesome using PCR products from different amplicons can be at comparing bacteria, archaea and protozoa. His manuscript also used the GREENGENES database which has not been properly updated in the last decade. On the other hand, our study is free from possible bias caused by PCR, because we are using a metagenomic approach which is PCR free, and can properly compare relative abundances of bacteria and eukaryotes. Our results are in agreement with

CORREO ELECTRÓNICO:

adrian.lopez@inia.es

Ctra. de La Coruña, Km. 7,5  
28040 MADRID  
TEL: 91 347 14 92  
FAX: 91 347 87 43



other studies that do not find a clear relationship between methane emissions and archaea relative abundance in the rumen (e.g. Shi W et al. 2014 Methane yield phenotypes linked to differential gene expression in the sheep rumen microbiome. *Genome Res.* 2014; doi: 10.1101/gr.168245.113. and Aguinaga Casañas MA, et al 2015. Methyl-coenzyme M reductase A as an indicator to estimate methane production from dairy cows. *J Dairy Sci.* 2015; doi: 10.3168/jds.2015-9310).

However, it must be pointed out that not-significant association does not imply absence of association, and therefore our results are not in contradiction with the reference provided by the reviewer. Besides, our results are in agreement with many other studies that reported an important role of fungi and protozoa with methane emissions, which we cited in our manuscript. For instances:

-Newbold CJ, et al. 2015 The role of ciliate protozoa in the rumen. *Front Microbiol.* 2015; doi:678 10.3389/fmicb.2015.01313.

-Williams AG and Coleman GS. *The Rumen Protozoa.* New York, NY: Springer New York;

and also Williams CL, et al. 2020. Rumen Protozoa Play a Significant Role in Fungal Predation and Plant Carbohydrate Breakdown. *Front. Microbiol.* 11:720. doi: 10.3389/fmicb.2020.00720 (actually not cited in the manuscript).

Thus, our study does not contradict previous results, not even those from the reviewer, and are actually in agreement with many other studies.

- 3) Finally, Dr. Watson suggested in his review that we should use some specific rumen microbiome gene catalogues. Interestingly, these reference databases were built by the reviewer and his collaborators. We believe this may incur in some conflict of interest at evaluating the manuscript. His group is currently working on a similar topic, even building a large database of rumen microbiomes using ONT. The other two reviewers are also experienced bioinformaticians working with microbial communities and they did not report any concerns with the methods in our article. Nonetheless, in order to double check the reviewer's concern, we used the Hungate database as reference in our pipeline. Below is a figure that compares the number of reads mapped to the KEGGs that resulted significant in our statistical analysis using either the NCBI or the Hungate databases. The figure shows a correlation=1 for the number of reads assigned from each reference data base. It also shows that the regression is exactly linear with  $x=y$ . This is a proof of concept that demonstrates that we obtain the same results with either database, and proves the reviewer wrong.

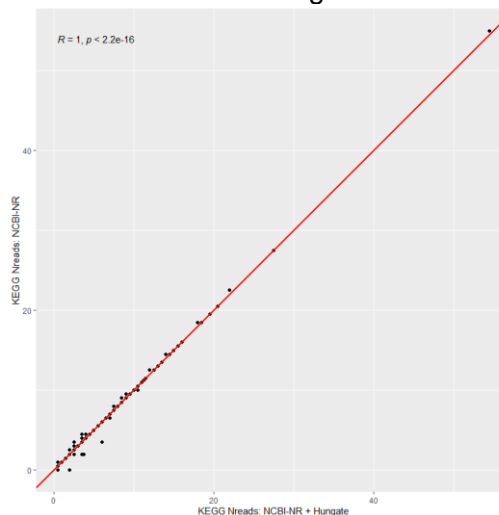

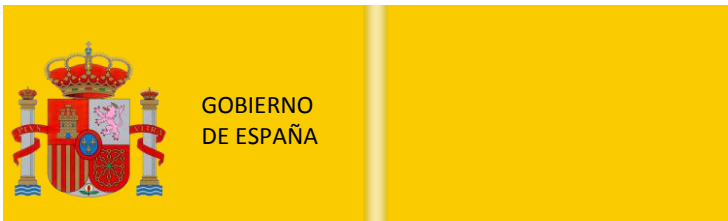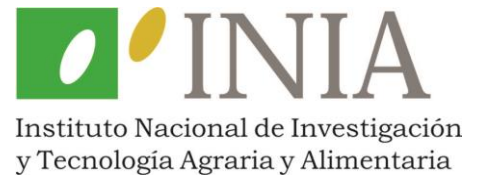

DEPARTAMENTO DE MEJORA GENETICA ANIMAL

Given the responses and analyses above, we believe that we have fully addressed the comments from the three reviewers or otherwise provided convincing reasons when appropriate.

Therefore, I would like to kindly ask to reconsider the decision made on our manuscript.

Sincerely,

Oscar González-Recio, on the behalf of my coauthors and myself

CORREO ELECTRÓNICO:

adrian.lopez@inia.es

Ctra. de La Coruña, Km. 7,5  
28040 MADRID  
TEL: 91 347 14 92  
FAX: 91 347 87 43
